# Supplementary material for: Rhodium-catalyzed oxidative amidation of allylic alcohols and aldehydes: effective conversion of amines and anilines into amides
Source: Royal Society of Chemistry journal article supplement (doi:10.1039/c5sc03103f), 2015-10-27
Supplement: c5sc03103f1.pdf [file c5sc03103f1.pdf]

# Rhodium-catalyzed oxidative amidation of allylic alcohols and aldehydes: effective conversion of amines and anilines into amides

Zhao Wu and Kami L. Hull

Department of Chemistry, University of Illinois at Urbana-Champaign, Urbana, IL 61820

## Supporting Information

### Table of Contents

|                                                                         |            |
|-------------------------------------------------------------------------|------------|
| <b>A. General Information .....</b>                                     | <b>S2</b>  |
| <b>B. Select Optimization Reactions.....</b>                            | <b>S3</b>  |
| <b>C. Control Experiments.....</b>                                      | <b>S11</b> |
| <b>D. Robust Chemical Screens for the Rapid Assessment.....</b>         | <b>S16</b> |
| <b>E. Deuterium Incorporation Studies .....</b>                         | <b>S17</b> |
| <b>F. Kinetic Isotope Effect Studies .....</b>                          | <b>S21</b> |
| <b>G. Competition Studies .....</b>                                     | <b>S22</b> |
| <b>H. Kinetic Profile of E- vs Z- Allylic Alcohol Amidation .....</b>   | <b>S24</b> |
| <b>I. Experimental Procedure, Isolation, and Characterization .....</b> | <b>S25</b> |
| <b>J. References .....</b>                                              | <b>S62</b> |
| <b>K. Spectral Data .....</b>                                           | <b>S63</b> |

## A. General Information

**General Experimental Procedures:** All reactions were carried out in flame-dried (or oven-dried at 140 °C for at least 2 h) glassware under an atmosphere of nitrogen unless otherwise indicated. Nitrogen was dried using a drying tube equipped with Drierite™ unless otherwise noted. Air- and moisture-sensitive reagents were handled in a nitrogen-filled glovebox (working oxygen level ~ 0.1 ppm). Column chromatography was performed with silica gel from Grace Davison Discovery Sciences (35-75 µm) with a column mixed as a slurry with the eluent and was packed, rinsed, and run under air pressure. Analytical thin-layer chromatography (TLC) was performed on precoated glass silica gel plates (by EMD Chemicals Inc.) with F-254 indicator. Visualization was either by short wave (254 nm) ultraviolet light, or by staining with potassium permanganate followed by brief heating on a hot plate or by a heat gun. Distillations were performed using a 3 cm short-path column under reduced pressure or by using a Hickman still at ambient pressure.

**Instrumentation:** <sup>1</sup>H NMR and <sup>13</sup>C NMR were recorded on a Varian Unity 400/500 MHz (100/125 MHz respectively for <sup>13</sup>C) or a VXR-500 MHz spectrometer. Spectra were referenced using either CDCl<sub>3</sub> or C<sub>6</sub>D<sub>6</sub> as solvents (unless otherwise noted) with the residual solvent peak as the internal standard (<sup>1</sup>H NMR: δ 7.26 ppm, <sup>13</sup>C NMR: δ 77.00 ppm for CDCl<sub>3</sub> and <sup>1</sup>H NMR: δ 7.15 ppm, <sup>13</sup>C NMR: δ 128.60 ppm for C<sub>6</sub>D<sub>6</sub>). Chemical shifts were reported in parts per million and multiplicities are as indicated: s (singlet,) d (doublet,) t (triplet,) q (quartet,) p (pentet,) m (multiplet,) and br (broad). Coupling constants, *J*, are reported in Hertz and integration is provided, along with assignments, as indicated. Analysis by Gas Chromatography-Mass Spectrometry (GC-MS) was performed using a Shimadzu GC-2010 Plus Gas chromatograph fitted with a Shimadzu GCMS-QP2010 SE mass spectrometer using electron impact (EI) ionization after analytes traveled through a SHRXI-5MS- 30m x 0.25 mm x 0.25 µm column using a helium carrier gas. Data are reported in the form of *m/z* (intensity relative to base peak = 100). Gas Chromatography (GC) was performed on a Shimadzu GC-2010 Plus gas chromatograph with SHRXI-MS- 15m x 0.25 mm x 0.25 µm column with nitrogen carrier gas and a flame ionization detector (FID). Low-resolution Mass Spectrometry and High Resolution Mass Spectrometry were performed in the Department of Chemistry at University of Illinois at Urbana-Champaign. The glove box, MBraun LABmaster sp, was maintained under nitrogen atmosphere. Melting points were recorded on a Thomas Hoover capillary melting point apparatus and are uncorrected.

**Materials:** Solvents used for extraction and column chromatography were reagent grade and used as received. Reaction solvents tetrahydrofuran (Fisher, unstabilized HPLC ACS grade), diethyl ether (Fisher, BHT stabilized ACS grade), methylene chloride (Fisher, unstabilized HPLC grade), dimethoxyethane (Fisher, certified ACS), toluene (Fisher, optima ACS grade), 1,4-dioxane (Fisher, certified ACS), acetonitrile (Fisher, HPLC grade), and hexanes (Fisher, ACS HPLC grade) were dried on a Pure Process Technology Glass Contour Solvent Purification System using activated Stainless Steel columns while following manufacture's recommendations for solvent preparation and dispensation unless otherwise noted. All amines were distilled and degassed by the freeze-pump-thaw method, and were stored under an atmosphere of nitrogen in glove box before use. All liquid aldehydes were distilled prior to use, and ketones, benzophenone and cyclohexanone, were used as received.

## B. Select Optimization Reactions

**Table S1.** Varying the ligand in optimizing the Rh-catalyzed oxidative amidation reaction <sup>a</sup>

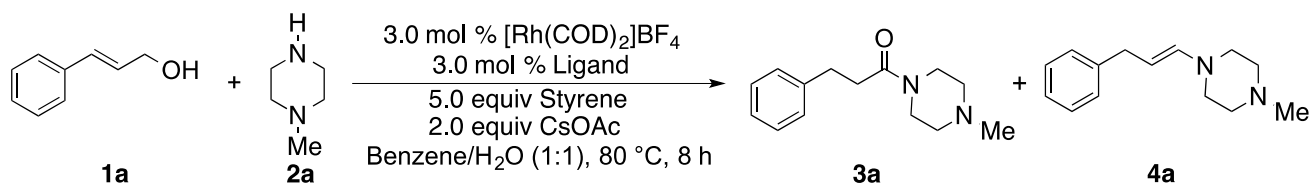

| Entry | Ligand     | % Yield <b>3a</b> <sup>b</sup> | % Yield <b>4a</b> <sup>b</sup> |
|-------|------------|--------------------------------|--------------------------------|
| 1     | dppp       | 72                             | 22                             |
| 2     | dppb       | 57                             | 32                             |
| 3     | dpppent    | 9                              | 70                             |
| 4     | dppf       | 31                             | 64                             |
| 5     | bipyridine | 4                              | 2                              |
| 6     | DPEphos    | 11                             | 75                             |
| 7     | Xantphos   | 17                             | 68                             |
| 8     | Davephos   | 18                             | 34                             |
| 9     | BINAP      | 87                             | 2                              |
| 10    | None       | 9                              | 10                             |

<sup>a</sup> Unless otherwise specified, all reactions were set up in oven-dried 4mL vials and performed with 3.0 mol % catalyst at 1.25 M in **alcohol** (0.25 mmol) with 3.0 equiv of **amine** for 8 h at 80 °C. **Amine** was distilled prior to use. <sup>b</sup> *In situ* yields were determined by GC analysis of the crude reaction mixture and comparison to diphenylmethane (20 μL, 0.12 mmol, 0.48 equiv.) as an internal standard.

**Table S2.** Varying the solvent in optimizing the Rh-catalyzed oxidative amidation reaction <sup>a</sup>

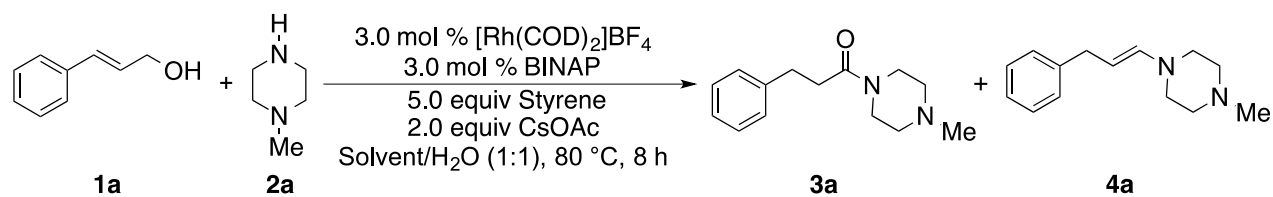

| Entry          | Solvent           | % Yield <b>3a</b> <sup>b</sup> | % Yield <b>4a</b> <sup>b</sup> |
|----------------|-------------------|--------------------------------|--------------------------------|
| 1              | Benzene           | 91                             | 3                              |
| 2              | Toluene           | 79                             | 7                              |
| 3              | Hexanes           | 88                             | 2                              |
| 4              | DME               | 80                             | 0                              |
| 5              | Et <sub>2</sub> O | 83                             | 0                              |
| 6              | 1,4-dioxane       | 75                             | 0                              |
| 7              | THF               | 82                             | 0                              |
| 8 <sup>c</sup> | MeCN              | 43                             | 0                              |

<sup>a</sup> Unless otherwise specified, all reactions were set up in oven-dried 4mL vials and performed with 3.0 mol % catalyst at 1.25 M in **alcohol** (0.25 mmol) with 3.0 equiv of **amine** for 8 h at 80 °C. **Amine** was distilled prior to use. <sup>b</sup> *In situ* yields were determined by GC analysis of the crude reaction mixture and comparison to diphenylmethane (20 μL, 0.12 mmol, 0.48 equiv.) as an internal standard. <sup>c</sup> Aldol condensation product was observed.

**Table S3.** Varying the concentration, and benzene/H<sub>2</sub>O ratio in optimizing the Rh-catalyzed oxidative amidation reaction <sup>a</sup>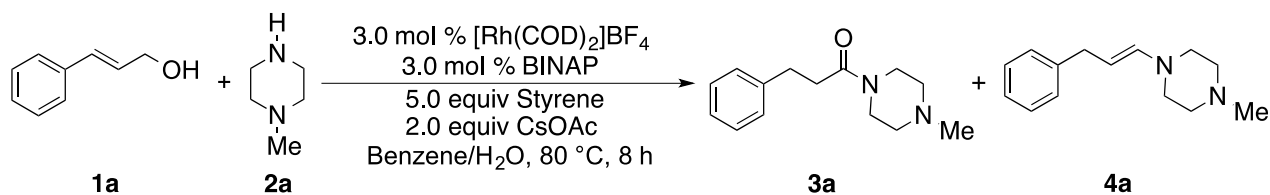

| Entry | Concentration (M) | Benzene: H <sub>2</sub> O | % Yield <b>3a</b> <sup>b</sup> | % Yield <b>4a</b> <sup>b</sup> |
|-------|-------------------|---------------------------|--------------------------------|--------------------------------|
| 1     | 0.31              | 1 : 1                     | 35                             | 14                             |
| 2     | 0.62              | 1 : 1                     | 60                             | 5                              |
| 3     | 1.2               | 1 : 1                     | 89                             | 0                              |
| 4     | 2.5               | 1 : 1                     | 88                             | 7                              |
| 5     | 1.2               | 2 : 1                     | 78                             | 15                             |
| 6     | 1.2               | 3 : 1                     | 66                             | 34                             |
| 7     | 1.2               | 4 : 1                     | 68                             | 32                             |
| 8     | 1.2               | 10: 1                     | 70                             | 30                             |
| 9     | 1.2               | 1 : o                     | 49                             | 51                             |
| 10    | 1.2               | 1 : 2                     | 62                             | 0                              |
| 11    | 1.2               | 1 : 3                     | 34                             | 13                             |

<sup>a</sup> Unless otherwise specified, all reactions were set up in oven-dried 4mL vials and performed with 3.0 mol % catalyst at 1.25 M in **alcohol** (0.25 mmol) with 3.0 equiv of **amine** for 8 h at 80 °C. **Amine** was distilled prior to use. <sup>b</sup> *In situ* yields were determined by GC analysis of the crude reaction mixture and comparison to diphenylmethane (20 μL, 0.12 mmol, 0.48 equiv.) as an internal standard.

**Table S4.** Varying the oxidants and bases in optimizing the Rh-catalyzed oxidative amidation reaction <sup>a</sup>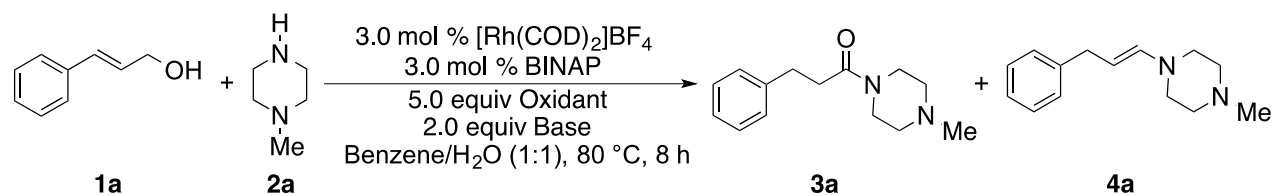

| Entry | Base                            | Oxidant             | % Yield 3a <sup>b</sup> | % Yield 4a <sup>b</sup> |
|-------|---------------------------------|---------------------|-------------------------|-------------------------|
| 1     | Na <sub>2</sub> CO <sub>3</sub> | styrene             | 36                      | 49                      |
| 2     | K <sub>2</sub> CO <sub>3</sub>  | styrene             | 47                      | 31                      |
| 3     | Cs <sub>2</sub> CO <sub>3</sub> | styrene             | 31                      | 58                      |
| 4     | NaOAc                           | styrene             | 89                      | 0                       |
| 5     | KOAc                            | styrene             | 88                      | 0                       |
| 6     | CsOAc                           | styrene             | 89                      | 0                       |
| 7     | NaO <sup>t</sup> Bu             | styrene             | 17                      | 47                      |
| 8     | KO <sup>t</sup> Bu              | styrene             | 13                      | 27                      |
| 9     | Et <sub>3</sub> N               | styrene             | 18                      | 38                      |
| 10    | Py                              | styrene             | 63                      | 0                       |
| 11    | none                            | styrene             | 39                      | 15                      |
| 12    | CsOAc                           | norbornene          | 56                      | 0                       |
| 13    | CsOAc                           | cyclohexene         | 39                      | 21                      |
| 14    | CsOAc                           | tert-butylethylene  | 28                      | 31                      |
| 15    | CsOAc                           | methyl-methacrylate | 25                      | 2                       |
| 16    | CsOAc                           | NMO                 | 65                      | 0                       |
| 17    | CsOAc                           | trans-stilbene      | 58                      | 7                       |
| 18    | CsOAc                           | acetone             | 58                      | 0                       |
| 19    | CsOAc                           | cyclohexanone       | 65                      | 0                       |
| 20    | CsOAc                           | none                | 41                      | 5                       |

<sup>a</sup> Unless otherwise specified, all reactions were set up in oven-dried 4mL vials and performed with 3.0 mol % catalyst at 1.25 M in **alcohol** (0.25 mmol) with 3.0 equiv of **amine** for 8 h at 80 °C. **Amine** was distilled prior to use. <sup>b</sup> *In situ* yields were determined by GC analysis of the crude reaction mixture and comparison to diphenylmethane (20 μL, 0.12 mmol, 0.48 equiv.) as an internal standard.

**Table S5.** Varying the equivalences of oxidants and bases in optimizing the Rh-catalyzed oxidative amidation reaction <sup>a</sup>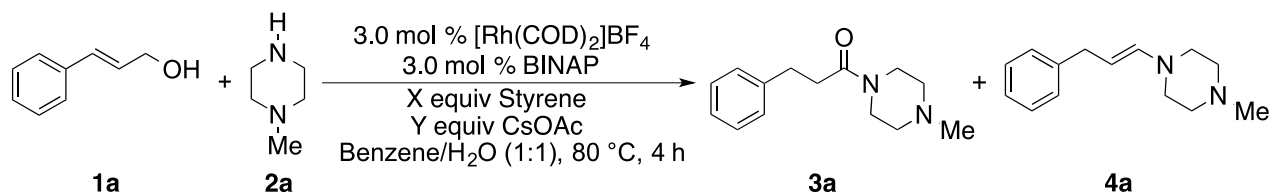

| Entry | X equiv styrene | Y equiv CsOAc | % Yield 3a <sup>b</sup> | % Yield 4a <sup>b</sup> |
|-------|-----------------|---------------|-------------------------|-------------------------|
| 1     | 5.0             | 0.20          | 48                      | 0                       |
| 2     | 5.0             | 0.50          | 61                      | 0                       |
| 3     | 5.0             | 1.0           | 63                      | 0                       |
| 4     | 5.0             | 1.5           | 76                      | 0                       |
| 5     | 5.0             | 2.0           | 81                      | 0                       |
| 6     | 5.0             | 2.5           | 87                      | 0                       |
| 7     | 5.0             | 3.0           | 85                      | 0                       |
| 8     | 1.0             | 2.5           | 61                      | 0                       |
| 9     | 2.0             | 2.5           | 73                      | 0                       |
| 10    | 3.0             | 2.5           | 78                      | 0                       |
| 11    | 4.0             | 2.5           | 80                      | 0                       |
| 12    | 8.0             | 2.5           | 83                      | 0                       |

<sup>a</sup> Unless otherwise specified, all reactions were set up in oven-dried 4mL vials and performed with 3.0 mol % catalyst at 1.25 M in **alcohol** (0.25 mmol) with 3.0 equiv of **amine** for 4 h at 80 °C. **Amine** was distilled prior to use. <sup>b</sup> *In situ* yields were determined by GC analysis of the crude reaction mixture and comparison to diphenylmethane (20 μL, 0.12 mmol, 0.48 equiv.) as an internal standard.

**Table S6.** Varying the equivalence of catalyst/ligand, allylic alcohol, and amine in optimizing the Rh-catalyzed oxidative amidation reaction <sup>a</sup>

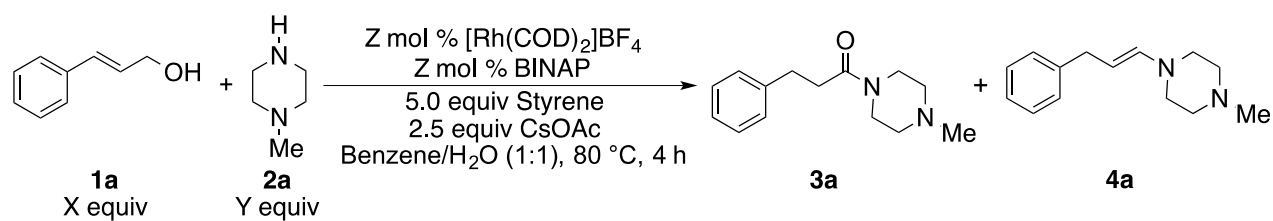

| Entry | X equiv alcohol | Y equiv amine | Z mol% catalyst | % Yield <b>3a</b> <sup>b</sup> | % Yield <b>4a</b> <sup>b</sup> |
|-------|-----------------|---------------|-----------------|--------------------------------|--------------------------------|
| 1     | 1.0             | 1.0           | 3.0             | 20                             | 13                             |
| 2     | 1.0             | 2.0           | 3.0             | 63                             | 0                              |
| 3     | 1.0             | 3.0           | 3.0             | 87                             | 0                              |
| 4     | 1.0             | 4.0           | 3.0             | 87                             | 0                              |
| 5     | 1.0             | 5.0           | 3.0             | 85                             | 0                              |
| 6     | 2.0             | 1.0           | 3.0             | 16                             | 35                             |
| 7     | 3.0             | 1.0           | 3.0             | 15                             | 45                             |
| 8     | 1.0             | 3.0           | 1.0             | 14                             | 65                             |
| 9     | 1.0             | 3.0           | 2.0             | 62                             | 11                             |
| 10    | 1.0             | 3.0           | 4.0             | 87                             | 0                              |
| 11    | 1.0             | 3.0           | 5.0             | 90                             | 0                              |
| 12    | 1.0             | 3.0           | 3.0             | 91                             | 0                              |

<sup>a</sup> Unless otherwise specified, all reactions were set up in oven-dried 4mL vials and performed with 3.0 mol % catalyst at 1.25 M in **alcohol** (0.25 mmol) with 3.0 equiv of **amine** for 4 h at 80 °C. **Amine** was distilled prior to use. <sup>b</sup> *In situ* yields were determined by GC analysis of the crude reaction mixture and comparison to diphenylmethane (20  $\mu\text{L}$ , 0.12 mmol, 0.48 equiv.) as an internal standard.



**Table S7.** Varying the temperature and reaction time in optimizing the Rh-catalyzed oxidative amidation reaction <sup>a</sup>

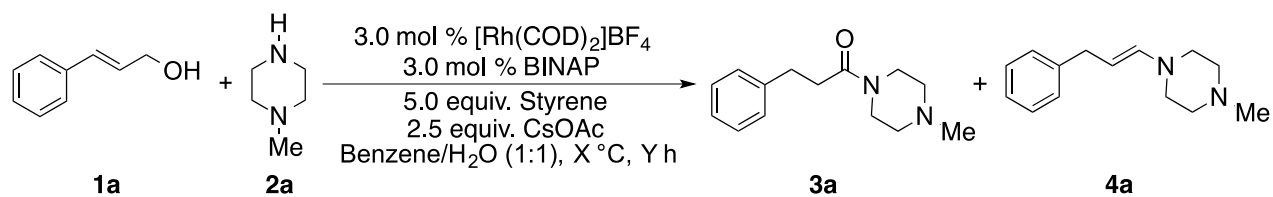

| Entry | X (°C) | Y (h) | % Yield <b>3a</b> <sup>b</sup> | % Yield <b>4a</b> <sup>b</sup> |
|-------|--------|-------|--------------------------------|--------------------------------|
| 1     | rt     | 8     | 9                              | 46                             |
| 2     | 40     | 8     | 10                             | 36                             |
| 3     | 60     | 8     | 76                             | 16                             |
| 4     | 80     | 8     | 91                             | 0                              |
| 5     | 100    | 8     | 91                             | 0                              |
| 6     | 120    | 8     | 86                             | 0                              |
| 7     | 80     | 0.5   | 43                             | 50                             |
| 8     | 80     | 1     | 68                             | 15                             |
| 9     | 80     | 2     | 75                             | 10                             |
| 10    | 80     | 4     | 83                             | 1                              |
| 11    | 80     | 6     | 83                             | 1                              |
| 12    | 80     | 8     | 84                             | 0                              |

<sup>a</sup> Unless otherwise specified, all reactions were set up in oven-dried 4mL vials and performed with 3.0 mol % catalyst at 1.25 M in **alcohol** (0.25 mmol) with 3.0 equiv of **amine**. **Amine** was distilled prior to use. <sup>b</sup> *In situ* yields were determined by GC analysis of the crude reaction mixture and comparison to diphenylmethane (20 μL, 0.12 mmol, 0.48 equiv.) as an internal standard.

**Table S8.** Optimization of Primary Amine Nucleophiles <sup>a</sup>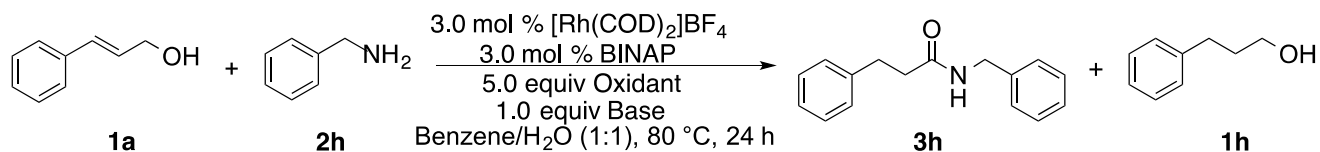

| Entry | Base                            | Oxidant           | % Yield <b>3h</b> <sup>b</sup> | % Yield <b>1h</b> <sup>b</sup> |
|-------|---------------------------------|-------------------|--------------------------------|--------------------------------|
| 1     | CsOAc                           | styrene           | 4                              | 0                              |
| 2     | Cs <sub>2</sub> CO <sub>3</sub> | styrene           | 35                             | 20                             |
| 3     | KOH                             | styrene           | 34                             | 26                             |
| 4     | CsOH·H <sub>2</sub> O           | styrene           | 37                             | 29                             |
| 5     | KOH                             | norbornene        | 56                             | 26                             |
| 6     | KOH                             | NMO               | 48                             | 37                             |
| 7     | KOH                             | acetone           | 84                             | 4                              |
| 8     | KOH                             | acetone(3 equiv)  | 82                             | 6                              |
| 9     | LiOH                            | acetone(3 equiv ) | 64                             | 5                              |
| 10    | NaOH                            | acetone(3 equiv ) | 74                             | 6                              |
| 11    | CsOH·H <sub>2</sub> O           | acetone(3 equiv ) | 77                             | 6                              |

<sup>a</sup> Unless otherwise specified, all reactions were set up in oven-dried 4mL vials and performed with 3.0 mol % catalyst at 1.25 M in **alcohol** (0.25 mmol) with 3.0 equiv of **amine** for 24 h at 80 °C. **Amine** was distilled prior to use. <sup>b</sup> *In situ* yields were determined by GC analysis of the crude reaction mixture and comparison to diphenylmethane (20  $\mu\text{L}$ , 0.12 mmol, 0.48 equiv.) as an internal standard.

### C. Control Reaction

1) **Table S9.** Control reactions for base and water in oxidative amidation of allylic alcohol<sup>a</sup>

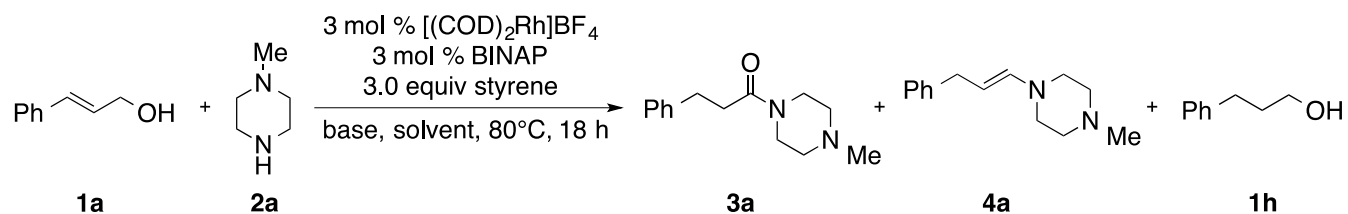

| Entry | Solvent                                         | Solvent Ratio | Base                  | % Yield <b>3a</b> <sup>b</sup> | % Yield <b>4a</b> <sup>b</sup> | % Yield <b>1h</b> <sup>b</sup> |
|-------|-------------------------------------------------|---------------|-----------------------|--------------------------------|--------------------------------|--------------------------------|
| 1     | C <sub>6</sub> H <sub>6</sub> /H <sub>2</sub> O | 1:1           | CsOAc                 | 88                             | 0                              | < 5                            |
| 2     | C <sub>6</sub> H <sub>6</sub>                   | -             | none                  | 1                              | 44                             | < 5                            |
| 3     | C <sub>6</sub> H <sub>6</sub> /H <sub>2</sub> O | 1:1           | none                  | 59                             | 0                              | < 5                            |
| 4     | C <sub>6</sub> H <sub>6</sub> /H <sub>2</sub> O | 1:2           | none                  | 68                             | 0                              | < 5                            |
| 5     | C <sub>6</sub> H <sub>6</sub>                   | -             | CsOAc                 | 60                             | 38                             | < 5                            |
| 6     | C <sub>6</sub> H <sub>6</sub>                   | 1:1           | buffer 1 <sup>c</sup> | 55                             | 5                              | < 5                            |
| 7     | C <sub>6</sub> H <sub>6</sub>                   | 1:2           | buffer 1 <sup>c</sup> | 68                             | 8                              | < 5                            |
| 8     | C <sub>6</sub> H <sub>6</sub>                   | 1:1           | buffer 2 <sup>d</sup> | 65                             | 4                              | < 5                            |
| 9     | C <sub>6</sub> H <sub>6</sub>                   | 1:2           | buffer 2 <sup>d</sup> | 69                             | 10                             | < 5                            |
| 10    | C <sub>6</sub> H <sub>6</sub>                   | 1:1           | buffer 3 <sup>e</sup> | 63                             | 5                              | < 5                            |
| 11    | C <sub>6</sub> H <sub>6</sub>                   | 1:2           | buffer 3 <sup>e</sup> | 70                             | 4                              | < 5                            |

<sup>a</sup> Standard conditions are: **1a** (1.0 equiv) **3a** (3.0 equiv), [(COD)<sub>2</sub>Rh]BF<sub>4</sub> (3.0 mol%), BINAP (3.0 mol%), styrene (3.0 equiv), CsOAc (1.5 equiv), benzene (0.2 mL, 1.2 M), 80°C, 4 hours. <sup>b</sup> *In situ* yields were determined by GC analysis of the crude reaction mixture and comparison to diphenylmethane (20 μL, 0.12 mmol, 0.48 equiv.) as an internal standard.

<sup>c</sup> buffer 1: pH=9.0, 20 nM Tris-HCl, 50 nM KCl, HCl <sup>d</sup> buffer 2: pH=7.5, 20 nM Tris-HCl, 50 nM KCl, HCl <sup>e</sup> buffer 3: pH=5.2, 300mM NaOAc, HOAc.

## 2) Oxidative amidation of homoallylic alcohol

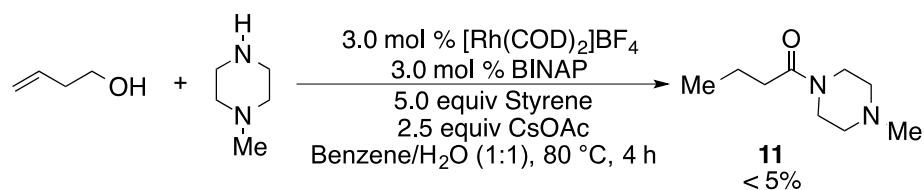

Procedure:  $[\text{Rh}(\text{COD})_2]\text{BF}_4$  (3.1 mg, 0.0075 mmol, 3.0 mol %), BINAP (4.7 mg, 0.0075 mmol, 3.0 mol %), and CsOAc (120 mg, 0.62 mmol, 2.5 equiv) were added to a 4 mL vial equipped with a stir bar. After purging with nitrogen, to the vial was added sequentially benzene (0.2 mL), 1-methylpiperazine (65  $\mu\text{L}$ , 0.75 mmol, 3.0 equiv), styrene (145  $\mu\text{L}$ , 1.25 mmol, 5.0 equiv), but-3-en-1-ol (21  $\mu\text{L}$ , 0.25 mmol, 1.0 equiv), and  $\text{D}_2\text{O}$  (0.2 mL). The resulting solution was allowed to stir for 4 h at 80 °C. Then, the reaction vial was cooled to room temperature followed by the addition of diphenylmethane as an internal standard for analysis of the crude reaction mixture. Only trace amount of **11** was not observed by analysis of reaction mixture by gas chromatography.

### GC of Reaction Crude

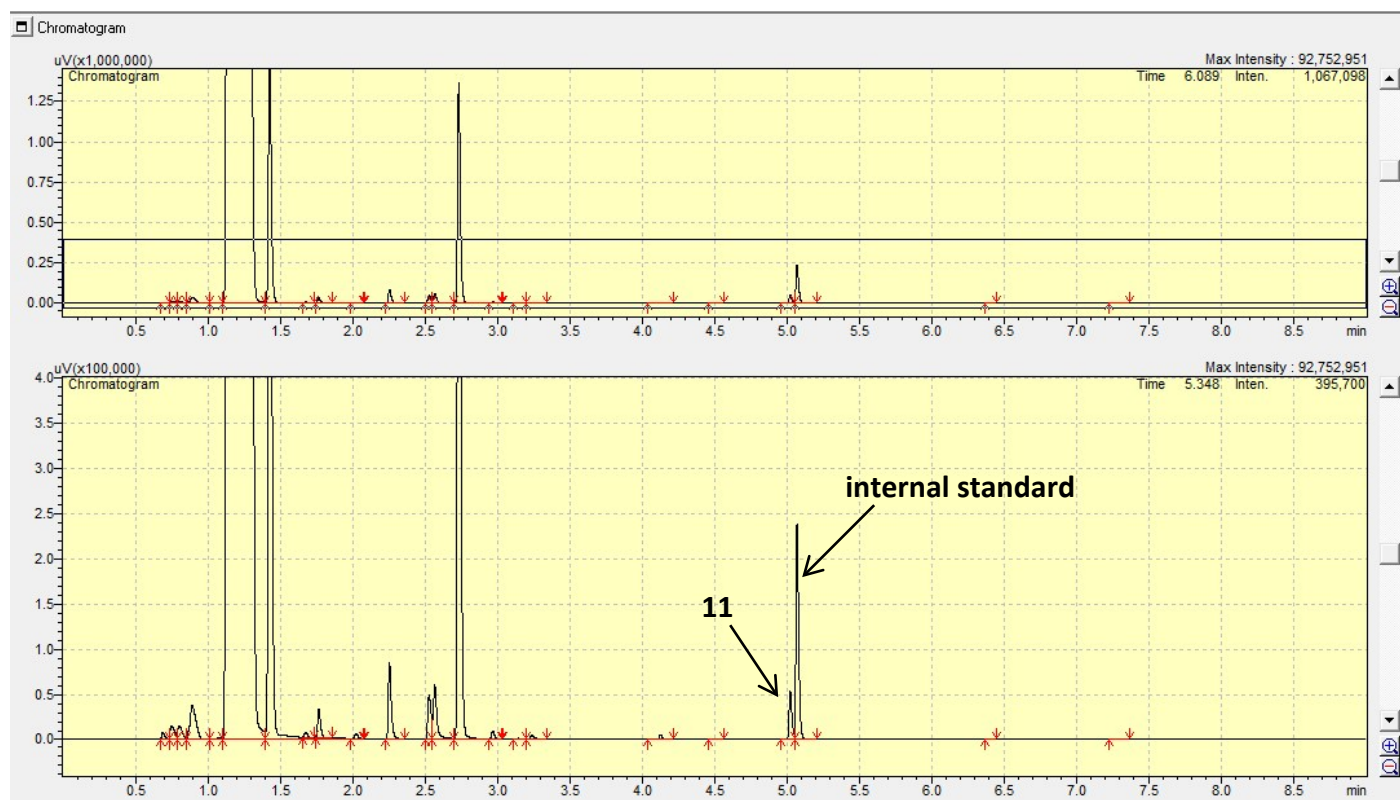

### 3) Oxidative amidation of primary alcohol **1h**

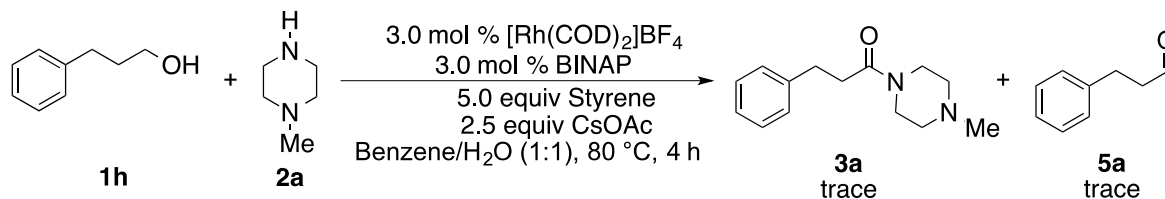

Procedure:  $[\text{Rh}(\text{COD})_2]\text{BF}_4$  (3.1 mg, 0.0075 mmol, 3.0 mol %), BINAP (4.7 mg, 0.0075 mmol, 3.0 mol %), and CsOAc (120 mg, 0.62 mmol, 2.5 equiv) were added to a 4 mL vial equipped with a stir bar. After purging with nitrogen, to the vial was added sequentially benzene (0.2 mL), 1-methylpiperazine (65  $\mu\text{L}$ , 0.75 mmol, 3.0 equiv), styrene (145  $\mu\text{L}$ , 1.25 mmol, 5.0 equiv), hydrocinnamyl alcohol (**1h**, 34  $\mu\text{L}$ , 0.25 mmol, 1.0 equiv), and  $\text{D}_2\text{O}$  (0.2 mL). The resulting solution was allowed to stir for 4 h at 80 °C. Then, the reaction vial was cooled to room temperature followed by the addition of diphenylmethane as an internal standard for analysis of the crude reaction mixture. **3a** and **5a** were observed as trace peaks by when analyzing the reaction mixture by gas chromatography.

GC of Reaction Crude

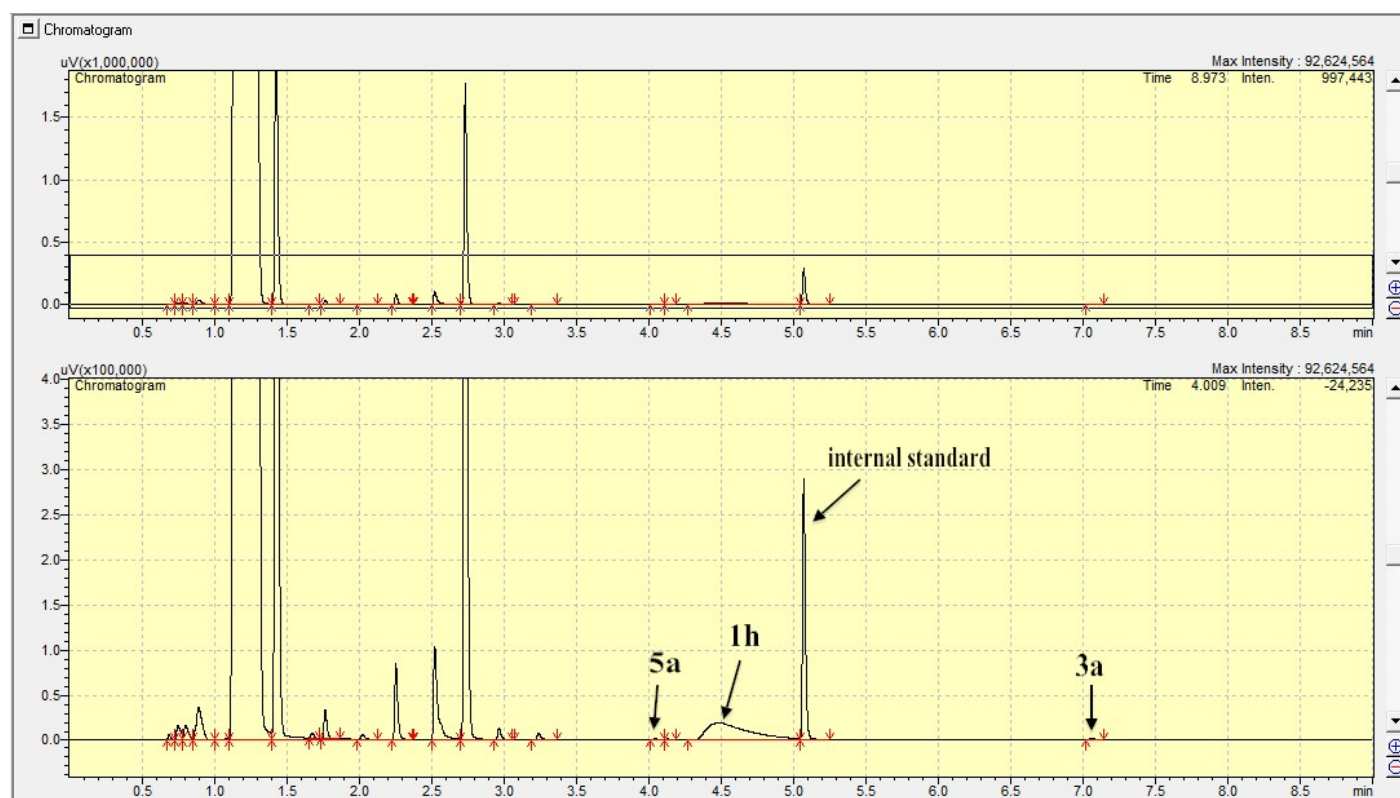

#### 4) Oxidative amidation of carboxylic acid

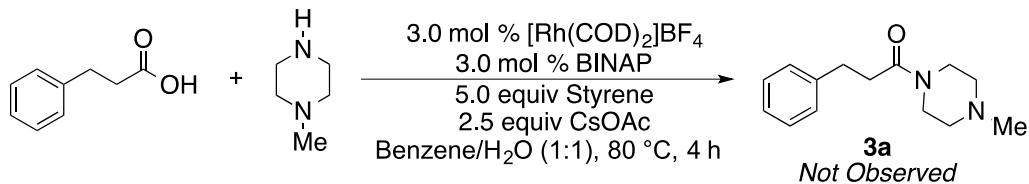

Procedure:  $[\text{Rh}(\text{COD})_2]\text{BF}_4$  (3.1 mg, 0.0075 mmol, 3.0 mol %), BINAP (4.7 mg, 0.0075 mmol, 3.0 mol %), and CsOAc (120 mg, 0.62 mmol, 2.5 equiv) were added to a 4 mL vial equipped with a stir bar. After purging with nitrogen, to the vial was added sequentially benzene (0.2 mL), 1-methylpiperazine (65  $\mu\text{L}$ , 0.75 mmol, 3.0 equiv), styrene (145  $\mu\text{L}$ , 1.25 mmol, 5.0 equiv), 3-phenylpropanoic acid (38 mg, 0.25 mmol, 1.0 equiv), and  $\text{D}_2\text{O}$  (0.2 mL). The resulting solution was allowed to stir for 4 h at 80 °C. Then, the reaction vial was cooled to room temperature followed by the addition of diphenylmethane as an internal standard for analysis of the crude reaction mixture. **3a** was not observed by analysis of reaction mixture by gas chromatography.

#### GC of Reaction Crude

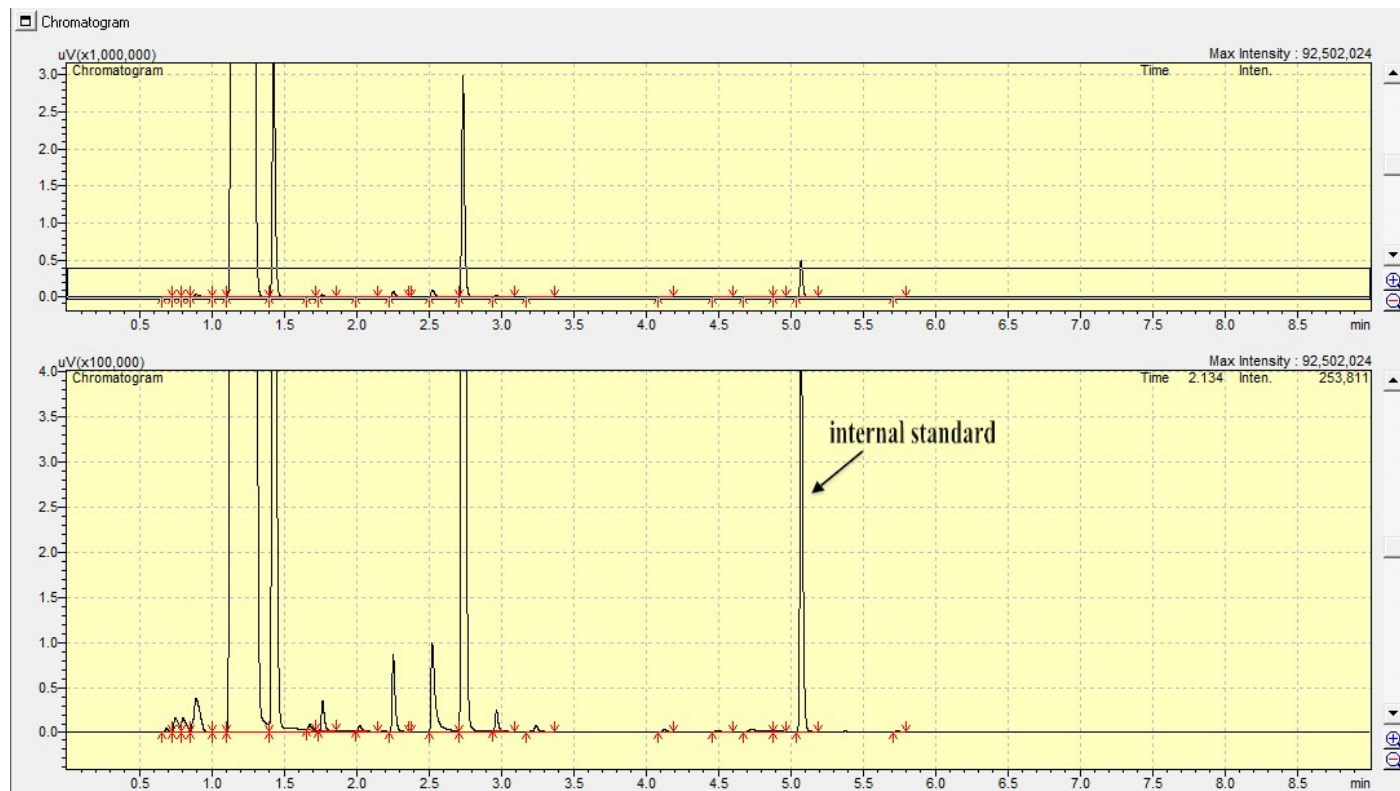

## 5) Oxidative amidation of carboxylic ester **12**

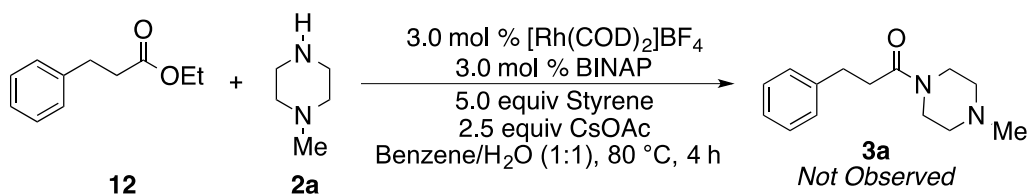

Procedure:  $[\text{Rh}(\text{COD})_2]\text{BF}_4$  (3.1 mg, 0.0075 mmol, 3.0 mol %), BINAP (4.7 mg, 0.0075 mmol, 3.0 mol %), and CsOAc (120 mg, 0.62 mmol, 2.5 equiv) were added to a 4 mL vial equipped with a stir bar. After purging with nitrogen, to the vial was added sequentially benzene (0.2 mL), 1-methylpiperazine (65  $\mu\text{L}$ , 0.75 mmol, 3.0 equiv), styrene (145  $\mu\text{L}$ , 1.25 mmol, 5.0 equiv), ethyl 3-phenylpropanoate (**12**, 44  $\mu\text{L}$ , 0.25 mmol, 1.0 equiv), and  $\text{D}_2\text{O}$  (0.2 mL). The resulting solution was allowed to stir for 4 h at 80  $^\circ\text{C}$ . Then, the reaction vial was cooled to room temperature followed by the addition of diphenylmethane as an internal standard for analysis of the crude reaction mixture. **3a** was not observed by analysis of reaction mixture by gas chromatography.

### GC of Reaction Crude

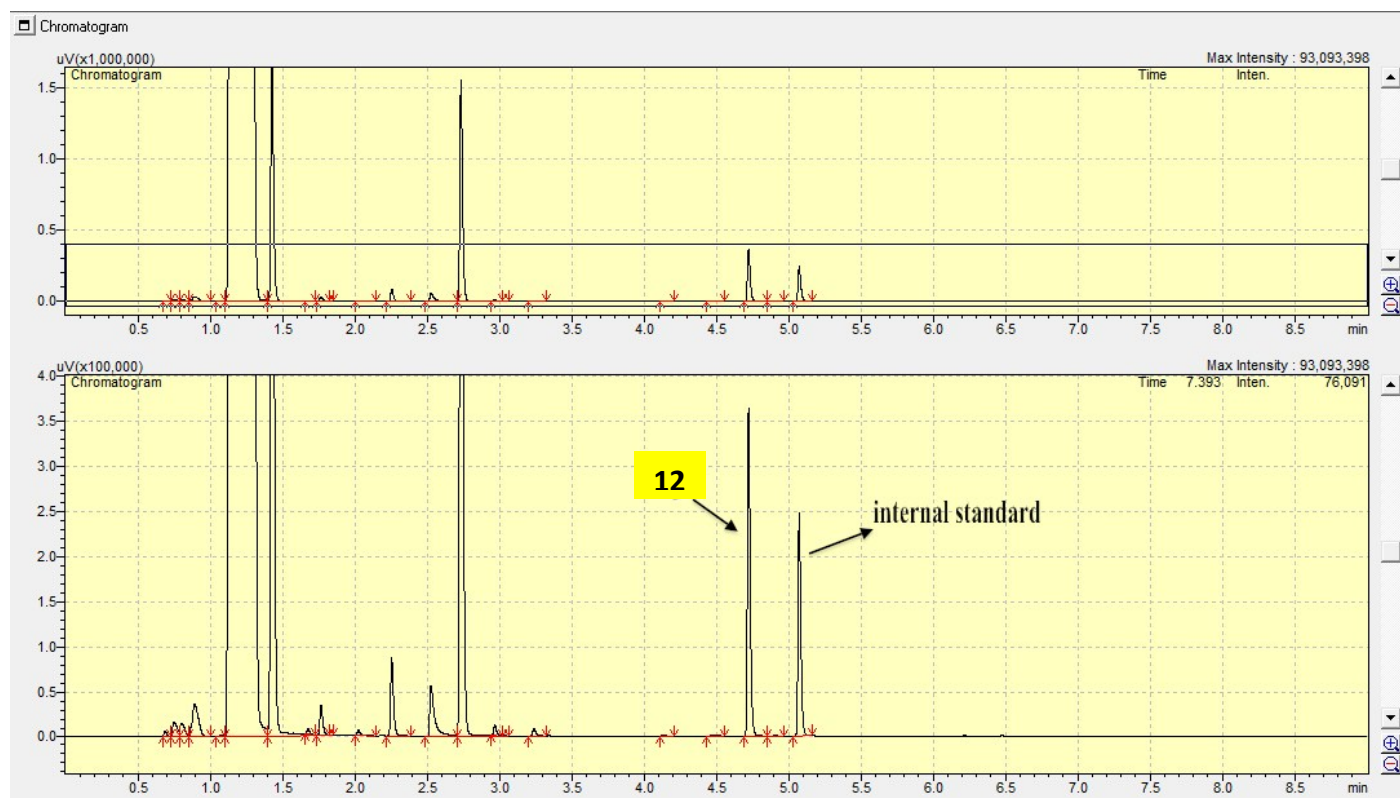

#### D. Robust Chemical Screens for the Rapid Assessment of Allylic alcohols Amidation

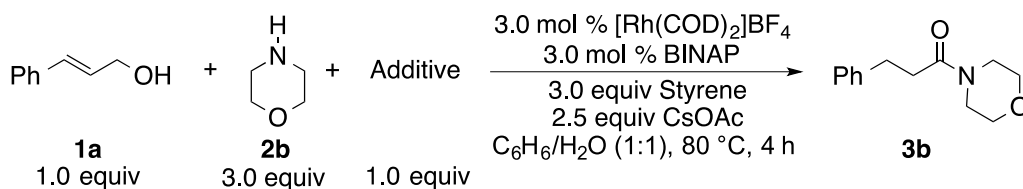

| Entry | Additive                                                                            | Yield of <b>3b</b> (%) | Additive remaining (%) |
|-------|-------------------------------------------------------------------------------------|------------------------|------------------------|
| 1     | None                                                                                | 83                     | ---                    |
| 2     | 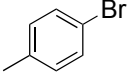   | 85                     | > 99%                  |
| 3     |    | 83                     | > 99%                  |
| 4     |    | 84                     | 92%                    |
| 5     |  | 86                     | 98%                    |
| 6     |  | 84                     | 99%                    |

**Experiment:**  $[\text{Rh}(\text{COD})_2]\text{BF}_4$  (3.1 mg, 0.0075 mmol, 3.0 mol %), BINAP (4.7 mg, 0.0075 mmol, 3.0 mol %), and CsOAc (120 mg, 0.62 mmol, 2.5 equiv) were added to a 4 mL vial equipped with a stir bar. After purging with nitrogen, to the vial was added sequentially benzene (0.2 mL), morpholine (65  $\mu\text{L}$ , 0.75 mmol, 3.0 equiv), styrene (87  $\mu\text{L}$ , 0.75 mmol, 3.0 equiv), cinnamyl alcohol (32  $\mu\text{L}$ , 0.25 mmol, 1.0 equiv), additive (0.25 mmol, 1.0 equiv) and DI water (0.2 mL). The resulting solution was allowed to stir for 4 h at 80 °C. Then, the reaction vial was cooled to room temperature followed by the addition of diphenylmethane as an internal standard for GC analysis of the crude reaction mixture to determine the yields of **3a** and remaining additives.



## E. Deuterium Incorporation Study

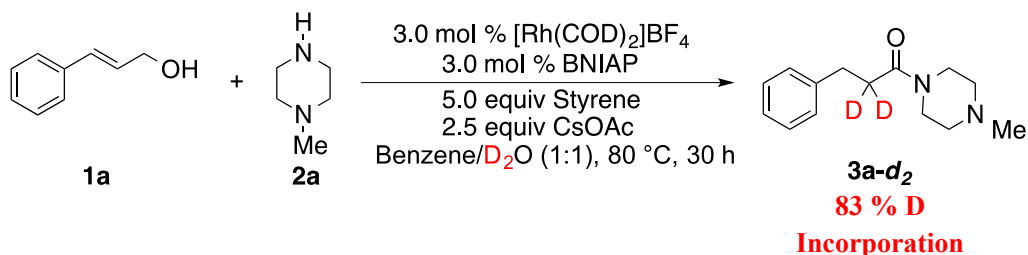

**1-(4-methylpiperazin-1-yl)-3-phenylpropan-1-one-2,2-d<sub>2</sub> (3a-d<sub>2</sub>):** [Rh(COD)<sub>2</sub>]<sub>2</sub>BF<sub>4</sub> (3.1 mg, 0.0075 mmol, 3.0 mol %), BINAP (4.7 mg, 0.0075 mmol, 3.0 mol %), and CsOAc (120 mg, 0.62 mmol, 2.5 equiv) were added to a 4 mL vial equipped with a stir bar. After purging with nitrogen, to the vial was added sequentially benzene (0.2 mL), 1-methylpiperazine (65  $\mu$ L, 0.75 mmol, 3.0 equiv), styrene (145  $\mu$ L, 1.25 mmol, 5.0 equiv), cinnamyl alcohol (32  $\mu$ L, 0.25 mmol, 1.0 equiv), and D<sub>2</sub>O (0.2 mL). The resulting solution was allowed to stir for 30 h at 80  $^\circ$ C. Then, the reaction vial was cooled to room temperature followed by the addition of diphenylmethane as an internal standard for analysis of the crude reaction mixture. The biphasic solution was added EtOAc, extracted with 1 M HCl solution three times. The combined water layer was basified by adding 2 M NaOH solution until pH > 10, then extracted with DCM three times. The combined organic layers were dried over anhydrous MgSO<sub>4</sub>, filtered and concentrated *in vacuo* to afford a yellow liquid in 69% yield.

<sup>1</sup>H NMR of **3a-d<sub>2</sub>**

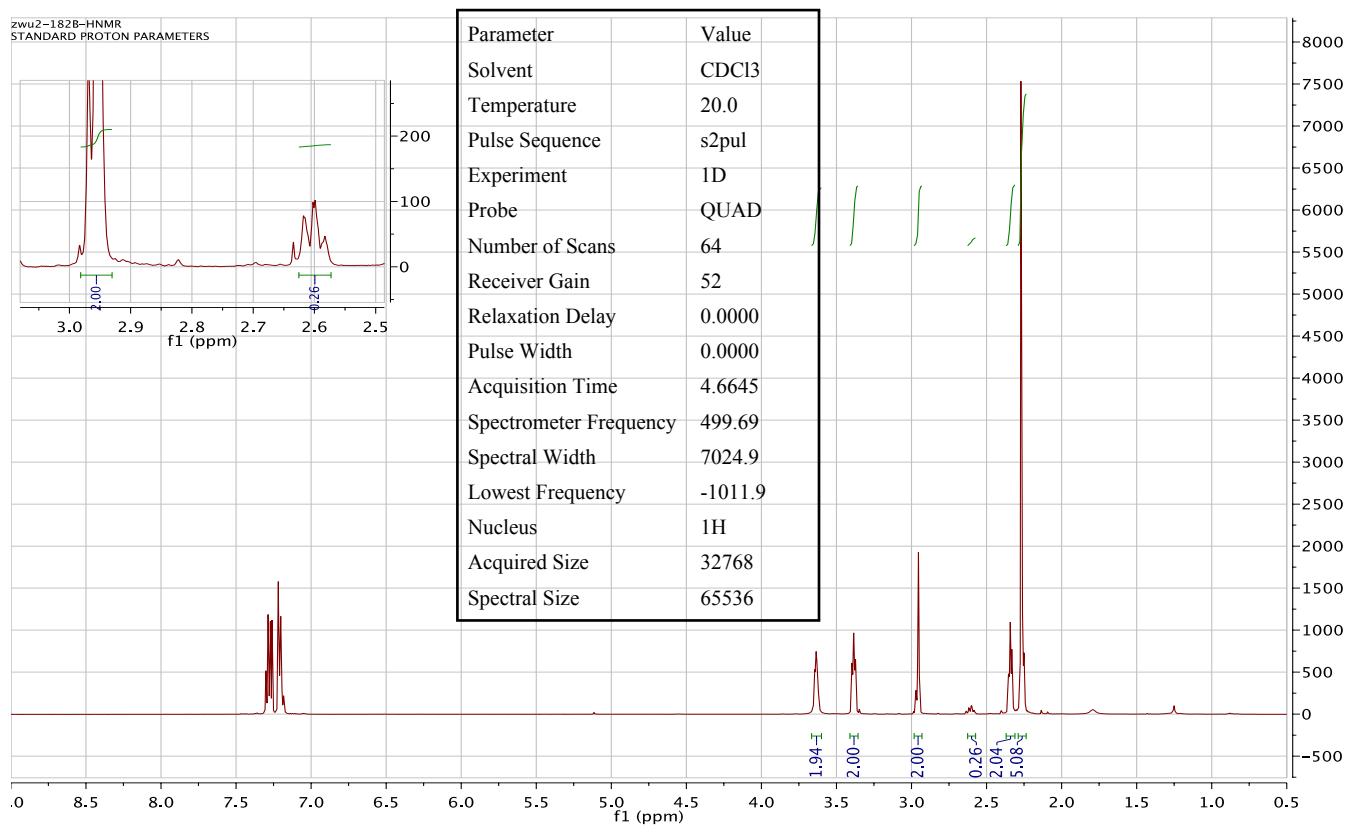

# $^2\text{H}$ NMR of **3a-d<sub>2</sub>**

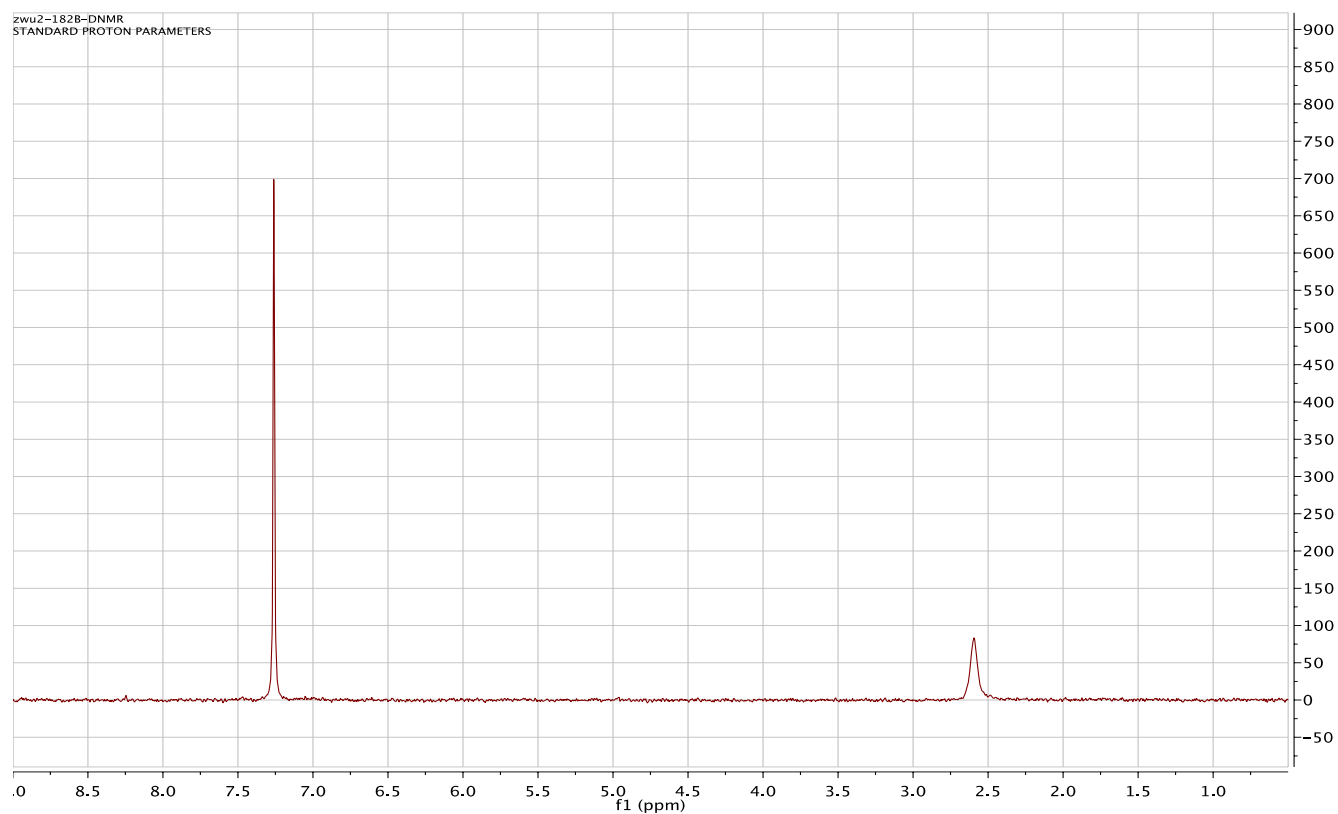

# Mass spectrum of **3a-d<sub>2</sub>**

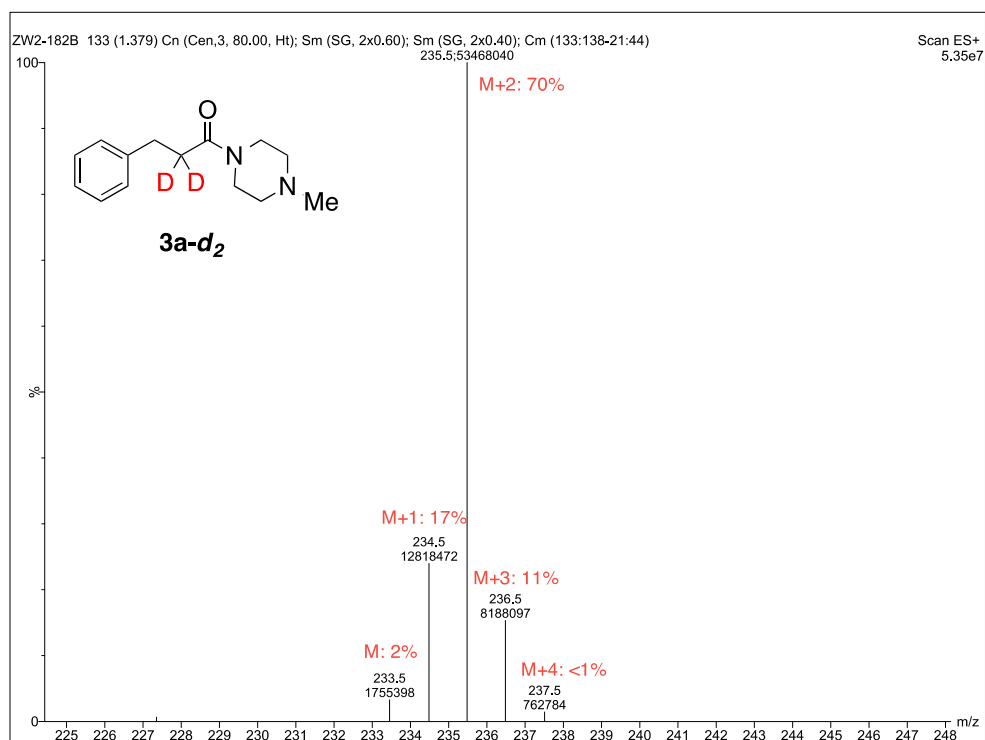

## Mass spectrum of **3a**

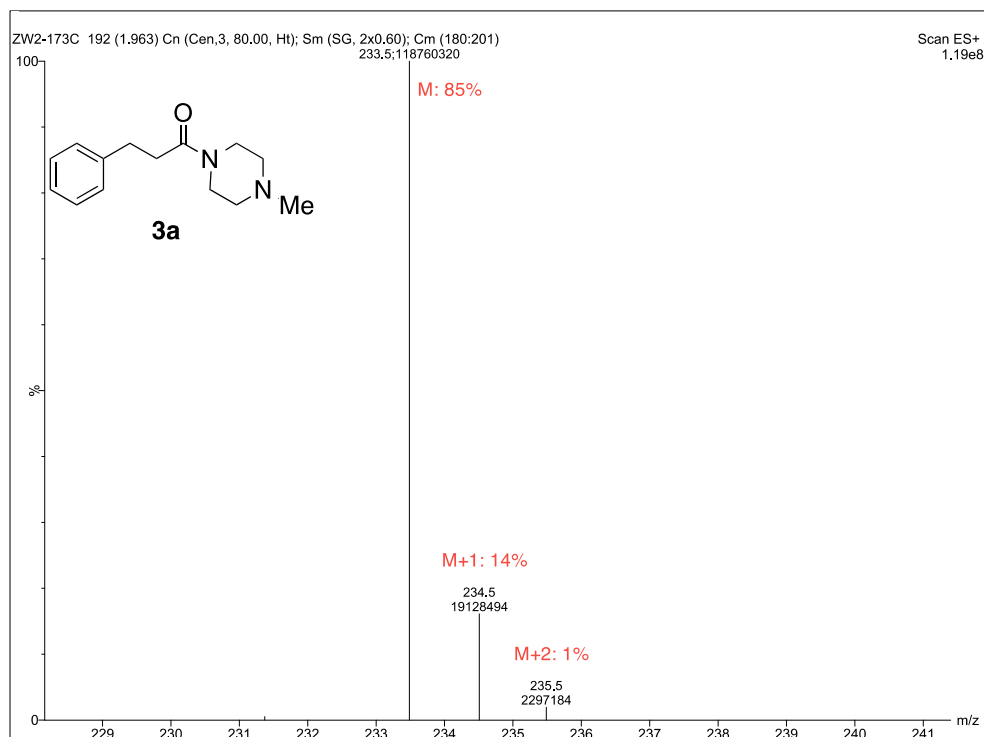

**Calculation:** based on mass spectrum of **3a**, M: M+1 = 85: 14. Combined with **3a-d<sub>2</sub>** mass spectrum, we can get **3a-d<sub>2</sub>** : **3a-d<sub>1</sub>** : **3a** = 78% : 20% : 2%, which should give 88% D-incorporation, close to experimental result: 83%.

**No deuterium scrambling observed when product **3a** was treated under standard conditions:**

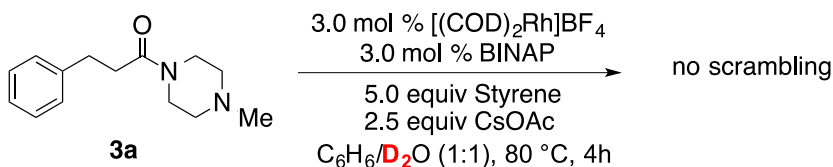

**No deuterium scrambling observed when aldehyde **5a** was treated under bi-phasic conditions:**

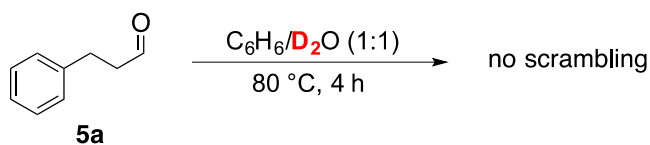

**Deuterium incorporation was observed at the alpha-position of aldehyde when 20 mol% amine **2a** was added:**

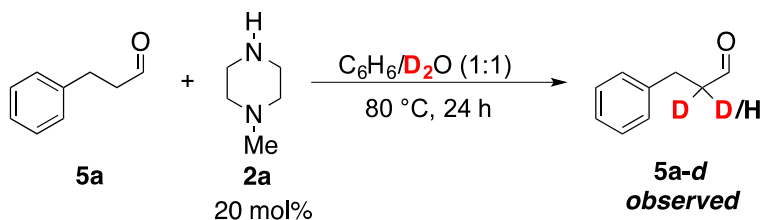

$^2\text{H}$  NMR of **5a-d**

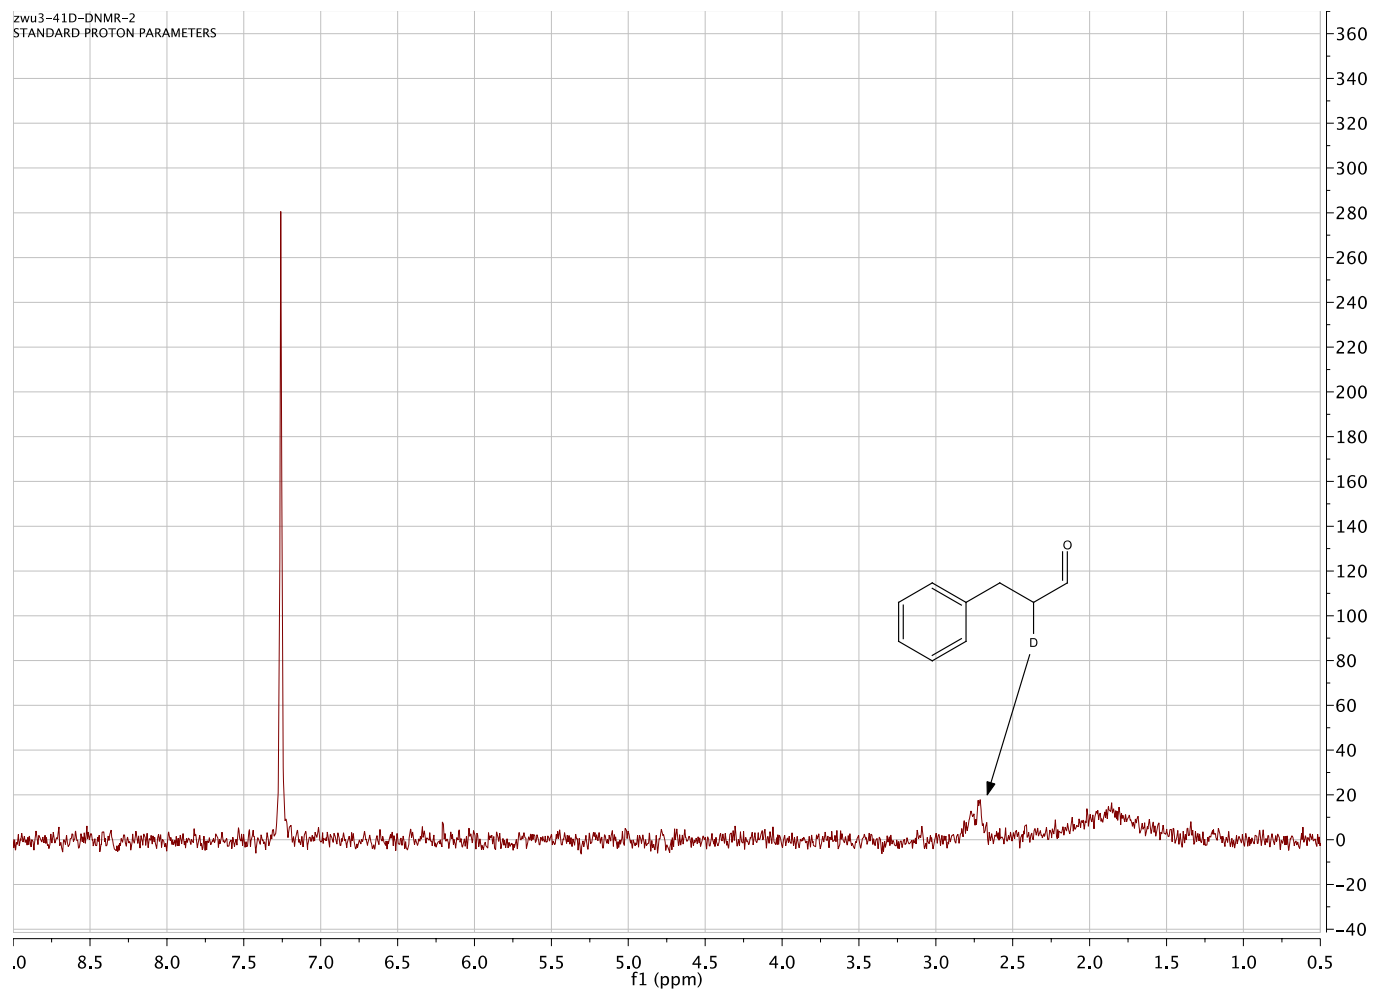

## F. Kinetic Isotope Effect Study

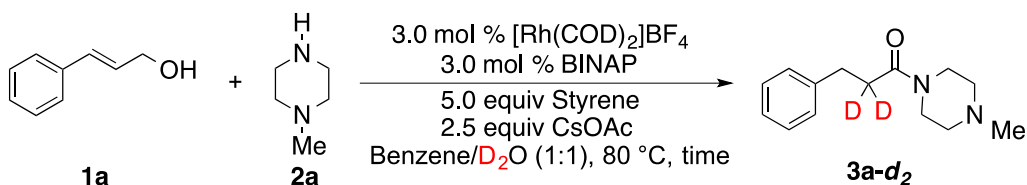

**H<sub>2</sub>O:** A series of reactions were set up according to standard procedure. After 2, 4, 6, 8, 10, and 12 min, one reaction was stopped and diluted with EtOAc, followed by the addition of diphenylmethane as an internal standard. The *in situ* yield of product **3a** was determined by GC analysis and comparison to diphenylmethane as an internal standard. The yield vs. time are plotted in **Figure S1** (red).

**D<sub>2</sub>O:** Same procedures were applied to D<sub>2</sub>O, and reaction time and yield of product **3a-d<sub>2</sub>** were plotted in **Figure S1** (blue).

**Figure S1: Kinetic Isotope Effect Data**

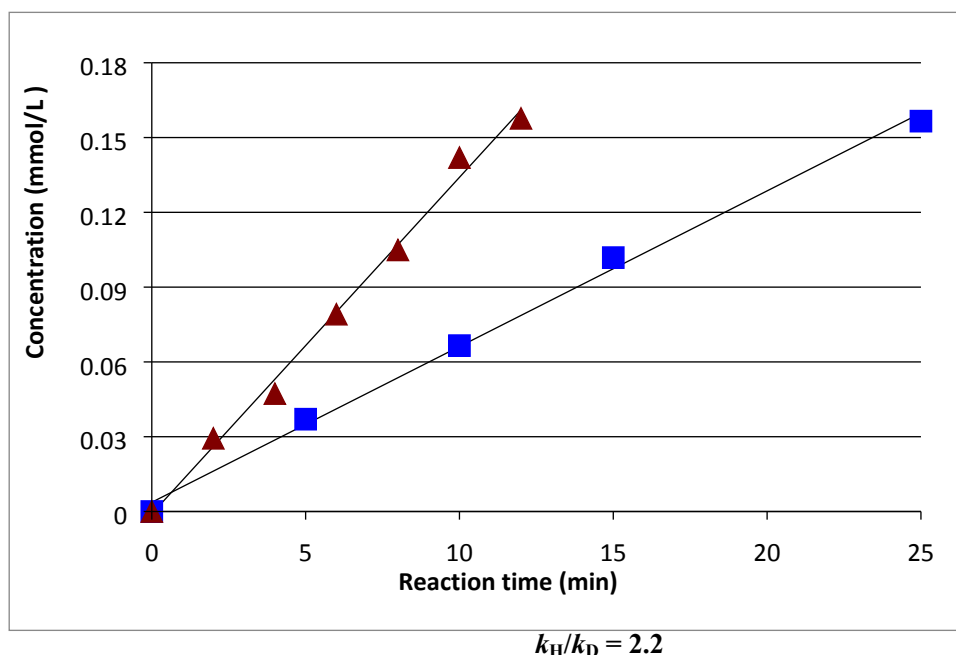

## G. Competition Studies

### 1) Allylic alcohols vs aldehyde

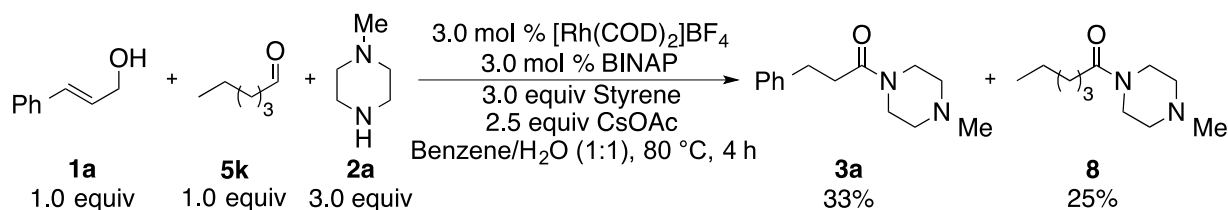

**Scheme 2, Eqn 1:**  $[\text{Rh}(\text{COD})_2]\text{BF}_4$  (3.1 mg, 0.0075 mmol, 3.0 mol %), BINAP (4.7 mg, 0.0075 mmol, 3.0 mol %), and CsOAc (120 mg, 0.62 mmol, 2.5 equiv) were added to a 4 mL vial equipped with a stir bar. After purging with nitrogen, to the vial was added sequentially benzene (0.2 mL), 1-methylpiperazine (83  $\mu\text{L}$ , 0.75 mmol, 3.0 equiv), styrene (87  $\mu\text{L}$ , 0.75 mmol, 3.0 equiv), cinnamyl alcohol (32  $\mu\text{L}$ , 0.25 mmol, 1.0 equiv), hexanal (31  $\mu\text{L}$ , 0.25 mmol, 1.0 equiv) and DI water (0.2 mL). The resulting solution was allowed to stir for 4 h at 80 °C. The reaction vial was cooled to room temperature followed by the addition of diphenylmethane as an internal standard for analysis of the crude reaction mixture. The biphasic solution was added EtOAc, extracted with 1 M HCl solution three times. The combined water layer was basified by adding 2 M NaOH solution until pH > 10, then extracted with DCM three times. The combined organic layers was dried over anhydrous  $\text{MgSO}_4$ , filtered and concentrated *in vacuo* to afford a yellow liquid. The ratio and yield of **3a** and **8** was determined by NMR analysis.

### 2) Disubstituted vs. trisubstituted allylic alcohols

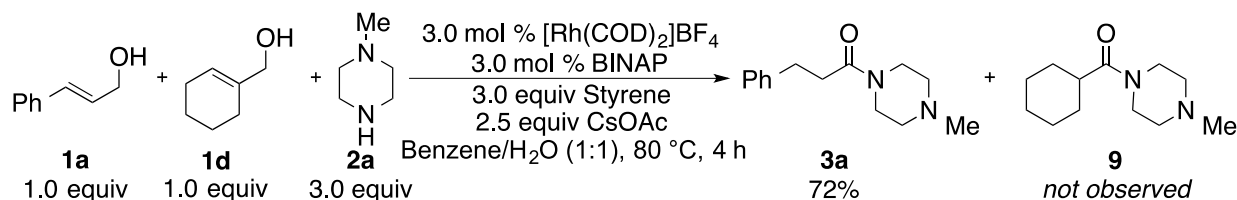

**Scheme 2, Eqn 2:**  $[\text{Rh}(\text{COD})_2]\text{BF}_4$  (3.1 mg, 0.0075 mmol, 3.0 mol %), BINAP (4.7 mg, 0.0075 mmol, 3.0 mol %), and CsOAc (120 mg, 0.62 mmol, 2.5 equiv) were added to a 4 mL vial equipped with a stir bar. After purging with nitrogen, to the vial was added sequentially benzene (0.2 mL), 1-methylpiperazine (83  $\mu\text{L}$ , 0.75 mmol, 3.0 equiv), styrene (87  $\mu\text{L}$ , 0.75 mmol, 3.0 equiv), cinnamyl alcohol (32  $\mu\text{L}$ , 0.25 mmol, 1.0 equiv), cyclohex-1-en-1-ylmethanol (29  $\mu\text{L}$ , 0.25 mmol, 1.0 equiv) and DI water (0.2 mL). The resulting solution was allowed to stir for 4 h at 80 °C. The reaction vial was cooled to room temperature followed by the addition of diphenylmethane as an internal standard. The yields were determined by GC analysis compared to internal standard.

### 3) Allylic vs benzylic alcohol

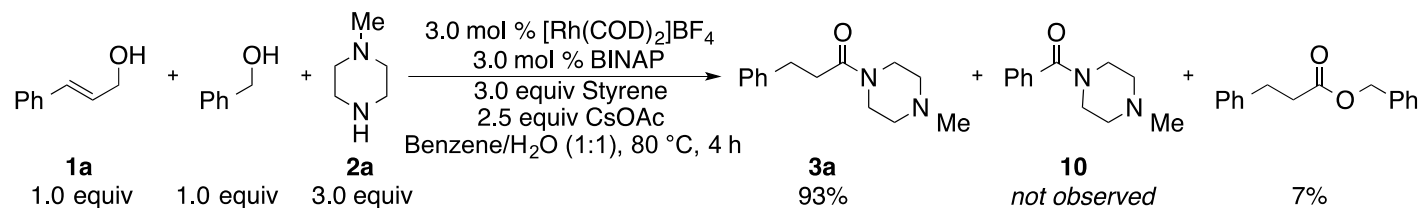

**Scheme 2, Eqn 3:**  $[\text{Rh}(\text{COD})_2]\text{BF}_4$  (3.1 mg, 0.0075 mmol, 3.0 mol %), BINAP (4.7 mg, 0.0075 mmol, 3.0 mol %), and CsOAc (120 mg, 0.62 mmol, 2.5 equiv) were added to a 4 mL vial equipped with a stir bar. After purging with with nitrogen, to the vial was added sequentially benzene (0.2 mL), 1-methylpiperazine (83  $\mu\text{L}$ , 0.75 mmol, 3.0 equiv), styrene (87  $\mu\text{L}$ , 0.75 mmol, 3.0 equiv), cinnamyl alcohol (32  $\mu\text{L}$ , 0.25 mmol, 1.0 equiv), benzyl alcohol (26  $\mu\text{L}$ , 0.25 mmol, 1.0 equiv) and DI water (0.2 mL). The resulting solution was allowed to stir for 4 h at 80  $^\circ\text{C}$ . The reaction vial was cooled to room temperature followed by the addition of diphenylmethane as an internal standard. The yields were determined by GC analysis compared to internal standard.

#### 4) Allylic Vs homoallylic alcohol

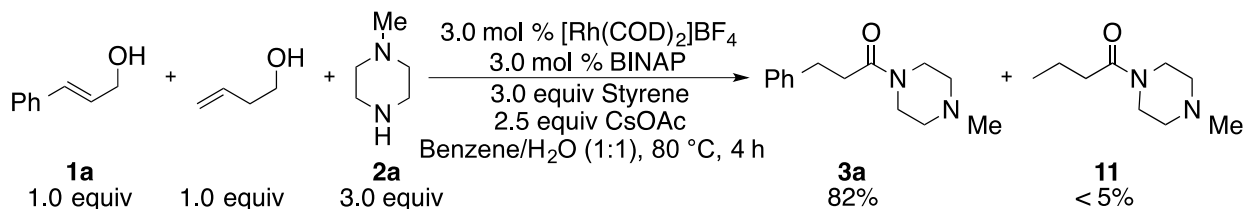

**Scheme 2, Eqn 4:**  $[\text{Rh}(\text{COD})_2]\text{BF}_4$  (3.1 mg, 0.0075 mmol, 3.0 mol %), BINAP (4.7 mg, 0.0075 mmol, 3.0 mol %), and CsOAc (120 mg, 0.62 mmol, 2.5 equiv) were added to a 4 mL vial equipped with a stir bar. After purging with with nitrogen, to the vial was added sequentially benzene (0.2 mL), 1-methylpiperazine (83  $\mu\text{L}$ , 0.75 mmol, 3.0 equiv), styrene (87  $\mu\text{L}$ , 0.75 mmol, 3.0 equiv), cinnamyl alcohol (32  $\mu\text{L}$ , 0.25 mmol, 1.0 equiv), homoallylic alcohol (21  $\mu\text{L}$ , 0.25 mmol, 1.0 equiv) and DI water (0.2 mL). The resulting solution was allowed to stir for 4 h at 80  $^\circ\text{C}$ . The reaction vial was cooled to room temperature followed by the addition of diphenylmethane as an internal standard. The yields were determined by GC analysis compared to internal standard.

#### 5) Allylic Vs aliphatic alcohol

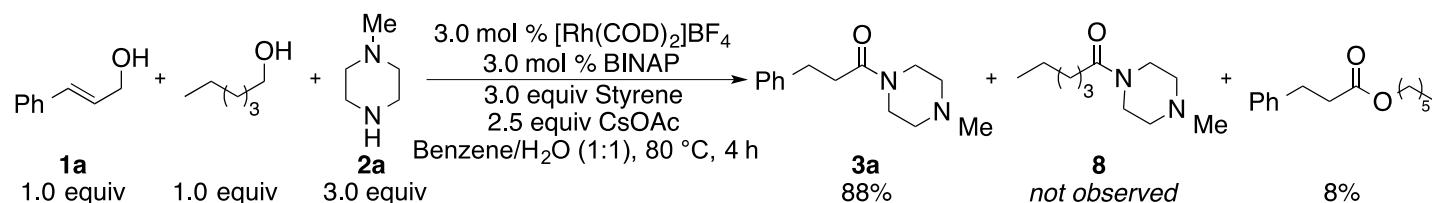

**Scheme 2, Eqn 5:**  $[\text{Rh}(\text{COD})_2]\text{BF}_4$  (3.1 mg, 0.0075 mmol, 3.0 mol %), BINAP (4.7 mg, 0.0075 mmol, 3.0 mol %), and CsOAc (120 mg, 0.62 mmol, 2.5 equiv) were added to a 4 mL vial equipped with a stir bar. After purging with with nitrogen, to the vial was added sequentially benzene (0.2 mL), 1-methylpiperazine (83  $\mu\text{L}$ , 0.75 mmol, 3.0 equiv), styrene (87  $\mu\text{L}$ , 0.75 mmol, 3.0 equiv), cinnamyl alcohol (32  $\mu\text{L}$ , 0.25 mmol, 1.0 equiv), *n*-hexanol (31  $\mu\text{L}$ , 0.25 mmol, 1.0 equiv) and DI water (0.2 mL). The resulting solution was allowed to stir for 4 h at 80  $^\circ\text{C}$ . The reaction vial was cooled to room temperature followed by the addition of diphenylmethane as an internal standard. The yields were determined by GC analysis compared to internal standard.

## H. Kinetic Profile of E- vs Z- Allylic Alcohol Amidation

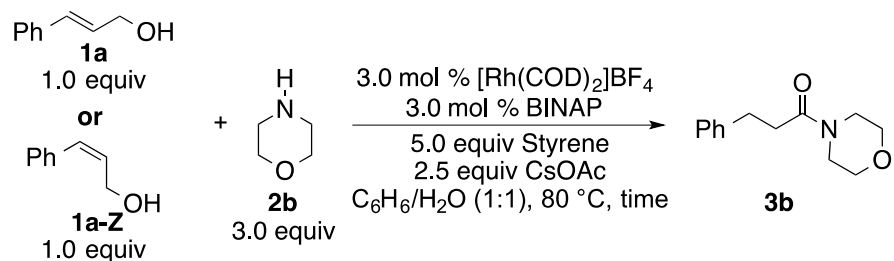

**E-cinnamyl alcohol (1a):** A series of reactions were set up according to standard procedure. After 30min, 1h, 2h, 3h, 4h, 8h, and 12h, one reaction was stopped and diluted with EtOAc, followed by the addition of diphenylmethane as an internal standard. The *in situ* yield of product **3a** was determined by GC analysis and comparison to diphenylmethane as an internal standard. The yields vs. time are plotted in **Figure S2** (blue).

**Z-cinnamyl alcohol (1a-Z):** Same procedures were applied to Z-cinnamyl alcohol, and reaction time and yield of product **3a** were plotted in **Figure S2** (red).

**Figure S2: E- vs Z- Allylic Alcohol**

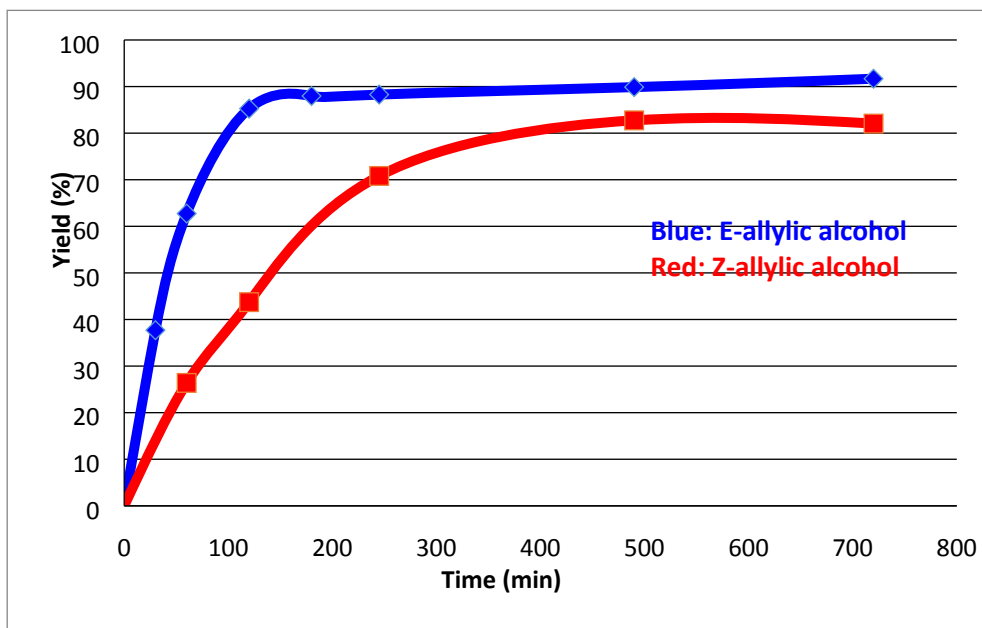



## I. Experimental Procedure, Isolation, and Characterization

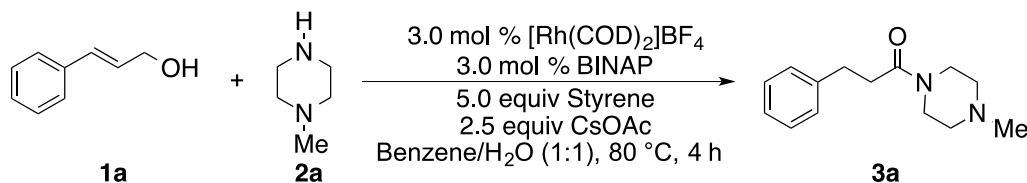

**1-(4-methylpiperazin-1-yl)-3-phenylpropan-1-one (Table 1, 3a):**  $[\text{Rh}(\text{COD})_2]\text{BF}_4$  (3.1 mg, 0.0075 mmol, 3.0 mol %), BINAP (4.7 mg, 0.0075 mmol, 3.0 mol %), and CsOAc (120 mg, 0.62 mmol, 2.5 equiv) were added to a 4 mL vial equipped with a stir bar. After purging with nitrogen, to the vial was added sequentially benzene (0.2 mL), 1-methylpiperazine (83  $\mu\text{L}$ , 0.75 mmol, 3.0 equiv), styrene (145  $\mu\text{L}$ , 1.25 mmol, 5.0 equiv), cinnamyl alcohol (32  $\mu\text{L}$ , 0.25 mmol, 1.0 equiv) and DI water (0.2 mL). The resulting solution was allowed to stir for 4 h at 80 °C. The reaction vial was cooled to room temperature followed by the addition of diphenylmethane as an internal standard for analysis of the crude reaction mixture. The biphasic solution was added EtOAc, extracted with 1 M HCl solution three times. The combined water layer was basified by adding 2 M NaOH solution until pH > 10, then extracted with DCM three times. The combined organic layers was dried over anhydrous  $\text{MgSO}_4$ , filtered and concentrated *in vacuo* to afford a yellow liquid in 74% yield.

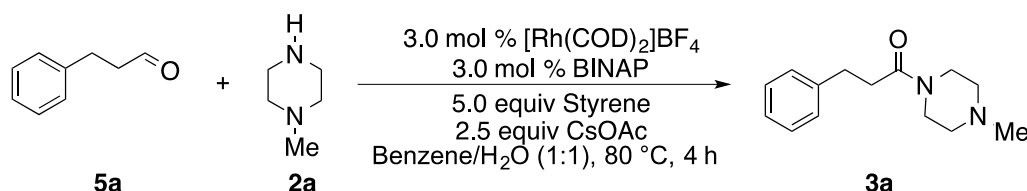

**1-(4-methylpiperazin-1-yl)-3-phenylpropan-1-one (Table 1, 3a):**  $[\text{Rh}(\text{COD})_2]\text{BF}_4$  (3.1 mg, 0.0075 mmol, 3.0 mol %), BINAP (4.7 mg, 0.0075 mmol, 3.0 mol %), and CsOAc (120 mg, 0.62 mmol, 2.5 equiv) were added to a 4 mL vial equipped with a stir bar. After purging with nitrogen, to the vial was added sequentially benzene (0.2 mL), 1-methylpiperazine (83  $\mu\text{L}$ , 0.75 mmol, 3.0 equiv), styrene (145  $\mu\text{L}$ , 1.25 mmol, 5.0 equiv), 3-phenylpropanal (34  $\mu\text{L}$ , 0.25 mmol, 1.0 equiv) and DI water (0.2 mL). The resulting solution was allowed to stir for 4 h at 80 °C. The reaction vial was cooled to room temperature followed by the addition of diphenylmethane as an internal standard for analysis of the crude reaction mixture. The biphasic solution was added purified by the same acid-base extraction to afford a yellow liquid in 76% yield.

**$^1\text{H}$  NMR** (400 MHz,  $\text{CDCl}_3$ )  $\delta$ : 7.32 – 7.26 (m, 2H), 7.24 – 7.17 (m, 3H), 3.64 (dd,  $J$  = 6.3, 4.2 Hz, 2H), 3.39 (dd,  $J$  = 5.8, 4.3 Hz, 2H), 2.97 (dd,  $J$  = 9.2, 6.7 Hz, 2H), 2.69 – 2.55 (m, 2H), 2.35 (t,  $J$  = 5.2 Hz, 2H), 2.27 (m, 5H, overlapping peaks) ppm.

**$^{13}\text{C}$  NMR** (101 MHz,  $\text{CDCl}_3$ )  $\delta$ : 170.75, 141.39, 128.66, 128.59, 126.32, 55.12, 54.81, 46.15, 45.55, 41.65, 35.17, 31.65 ppm.

**IR:**  $\nu$  2940, 2795, 1643, 1440  $\text{cm}^{-1}$ .

**HRMS** (ESI-TOF)  $m/z$ :  $[\text{M}+\text{H}^+]$  calculated for  $\text{C}_{14}\text{H}_{21}\text{N}_2\text{O}$ , 233.1654; found, 233.1661.

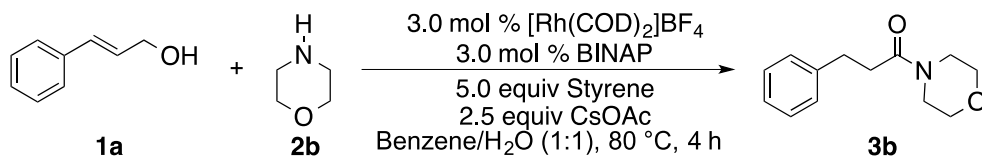

**1-morpholino-3-phenylpropan-1-one (Table 1, 3b):**  $[\text{Rh}(\text{COD})_2]\text{BF}_4$  (3.1 mg, 0.0075 mmol, 3.0 mol %), BINAP (4.7 mg, 0.0075 mmol, 3.0 mol %), and CsOAc (120 mg, 0.62 mmol, 2.5 equiv) were added to a 4 mL vial equipped with a stir bar. After purging with nitrogen, to the vial was added sequentially benzene (0.2 mL), morpholine (65  $\mu\text{L}$ , 0.75 mmol, 3.0 equiv), styrene (145  $\mu\text{L}$ , 1.25 mmol, 5.0 equiv), cinnamyl alcohol (32  $\mu\text{L}$ , 0.25 mmol, 1.0 equiv) and DI water (0.2 mL). The resulting solution was allowed to stir for 4 h at 80  $^\circ\text{C}$ . Then, the reaction vial was cooled to room temperature followed by the addition of diphenylmethane as an internal standard for analysis of the crude reaction mixture. The biphasic solution was added EtOAc, dried over anhydrous  $\text{MgSO}_4$ , and filtered. The solution was concentrated *in vacuo* and then purified by silica gel chromatography (1:1 hexanes/EtOAc) to afford a light yellow liquid in 91% yield.

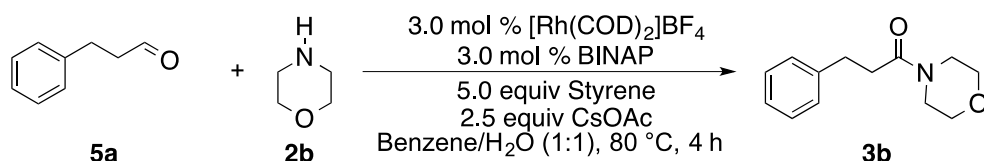

**1-morpholino-3-phenylpropan-1-one (Table 1, 3b):**  $[\text{Rh}(\text{COD})_2]\text{BF}_4$  (3.1 mg, 0.0075 mmol, 3.0 mol %), BINAP (4.7 mg, 0.0075 mmol, 3.0 mol %), and CsOAc (120 mg, 1.25 mmol, 2.5 equiv) were added to a 4 mL vial equipped with a stir bar. After purging with nitrogen, to the vial was added sequentially benzene (0.2 mL), morpholine (65  $\mu\text{L}$ , 0.75 mmol, 3.0 equiv), styrene (145  $\mu\text{L}$ , 1.25 mmol, 5.0 equiv), 3-phenylpropanal (34  $\mu\text{L}$ , 0.25 mmol, 1.0 equiv) and DI water (0.2 mL). The resulting solution was allowed to stir for 4 h at 80  $^\circ\text{C}$ . Then, the reaction vial was cooled to room temperature followed by the addition of diphenylmethane as an internal standard for analysis of the crude reaction mixture. The biphasic solution was added EtOAc, dried over anhydrous  $\text{MgSO}_4$ , and filtered. The solution was concentrated *in vacuo* and then purified by silica gel chromatography (1:1 hexanes/EtOAc) to afford a light yellow liquid in 88% yield.

$R_f = 0.15$

**$^1\text{H}$  NMR** (400 MHz,  $\text{CDCl}_3$ )  $\delta$ : 7.33 – 7.27 (m, 2H), 7.25 – 7.18 (m, 3H), 3.70 – 3.58 (m, 4H), 3.51 (dd,  $J = 5.7, 4.0$  Hz, 2H), 3.36 (dd,  $J = 5.7, 4.0$  Hz, 2H), 2.98 (t,  $J = 7.8$  Hz, 2H), 2.62 (t,  $J = 7.8$  Hz, 2H) ppm.

**$^{13}\text{C}$  NMR** (101 MHz,  $\text{CDCl}_3$ )  $\delta$ : 170.98, 141.17, 128.67, 128.58, 126.39, 66.97, 66.58, 46.07, 42.04, 34.94, 31.60 ppm.

**IR:**  $\nu$  2927, 2857, 1642, 1455, 1435, 1227, 1333  $\text{cm}^{-1}$ .

**HRMS** (ESI-TOF)  $m/z$ :  $[\text{M}+\text{H}^+]$  calculated for  $\text{C}_{13}\text{H}_{17}\text{NO}_2$ , 220.1338; found, 220.1342.

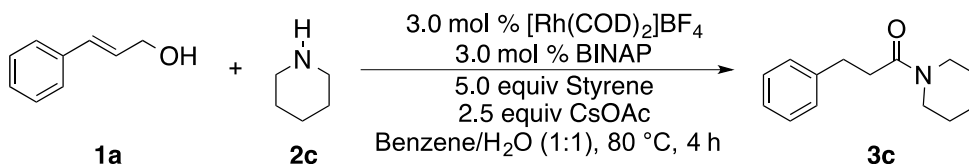

**3-phenyl-1-(piperidin-1-yl)propan-1-one (Table 1, 3c):**  $[\text{Rh}(\text{COD})_2]\text{BF}_4$  (3.1 mg, 0.0075 mmol, 3.0 mol %), BINAP (4.7 mg, 0.0075 mmol, 3.0 mol %), and CsOAc (120 mg, 1.25 mmol, 2.5 equiv) were added to a 4 mL vial equipped with a stir bar. After purging with with nitrogen, to the vial was added sequentially benzene (0.2 mL), piperidine (74  $\mu\text{L}$ , 0.75 mmol, 3.0 equiv), styrene (145  $\mu\text{L}$ , 1.25 mmol, 5.0 equiv), cinnamyl alcohol (32  $\mu\text{L}$ , 0.25 mmol, 1.0 equiv) and DI water (0.2 mL). The resulting solution was allowed to stir for 4 h at 80  $^\circ\text{C}$ . Then, the reaction vial was cooled to room temperature followed by the addition of diphenylmethane as an internal standard for analysis of the crude reaction mixture. The biphasic solution was added EtOAc, dried over anhydrous  $\text{MgSO}_4$ , and filtered. The solution was concentrated *in vacuo* and then purified by silica gel chromatography (4:1 hexanes/EtOAc) to afford a colorless liquid in 84% yield.

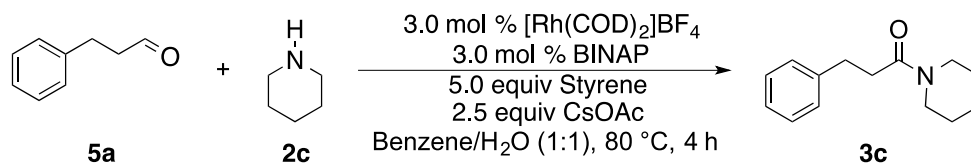

**3-phenyl-1-(piperidin-1-yl)propan-1-one (Table 1, 3c):**  $[\text{Rh}(\text{COD})_2]\text{BF}_4$  (3.1 mg, 0.0075 mmol, 3.0 mol %), BINAP (4.7 mg, 0.0075 mmol, 3.0 mol %), and CsOAc (120 mg, 1.25 mmol, 2.5 equiv) were added to a 4 mL vial equipped with a stir bar. After purging with with nitrogen, to the vial was added sequentially benzene (0.2 mL), morpholine (65  $\mu\text{L}$ , 0.75 mmol, 3.0 equiv), styrene (145  $\mu\text{L}$ , 1.25 mmol, 5.0 equiv), 3-phenylpropanal (34  $\mu\text{L}$ , 0.25 mmol, 1.0 equiv) and DI water (0.2 mL). The resulting solution was allowed to stir for 4 h at 80  $^\circ\text{C}$ . Then, the reaction vial was cooled to room temperature followed by the addition of diphenylmethane as an internal standard for analysis of the crude reaction mixture. The biphasic solution was added EtOAc, dried over anhydrous  $\text{MgSO}_4$ , and filtered. The solution was concentrated *in vacuo* and then purified by silica gel chromatography (1:1 hexanes/EtOAc) to afford a light yellow liquid in 73% yield.

$R_f = 0.2$

$^1\text{H NMR}$  (400 MHz,  $\text{CDCl}_3$ )  $\delta$ : 7.29 (dd,  $J = 8.1, 6.8$  Hz, 2H), 7.25 – 7.16 (m, 3H), 3.61 – 3.51 (m, 2H), 3.38 – 3.29 (m, 2H), 3.03 – 2.91 (m, 2H), 2.67 – 2.57 (m, 2H), 1.61 (dt,  $J = 7.6, 4.7, 2.9$  Hz, 2H), 1.56 – 1.41 (m, 4H) ppm.

$^{13}\text{C NMR}$  (101 MHz,  $\text{CDCl}_3$ )  $\delta$ : 170.53, 141.61, 128.57, 126.20, 46.74, 42.84, 35.35, 31.76, 26.52, 25.68, 24.66 ppm.

**IR:**  $\nu$  2937, 2858, 1639, 1441, 1252, 1218  $\text{cm}^{-1}$ .

**HRMS** (ESI-TOF)  $m/z$ :  $[\text{M}+\text{H}^+]$  calculated for  $\text{C}_{14}\text{H}_{20}\text{NO}$ , 218.1545; found, 218.1550.

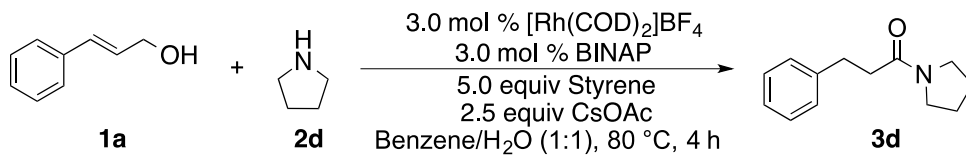

**3-phenyl-1-(pyrrolidin-1-yl)propan-1-one (Table 1, 3d):**  $[\text{Rh}(\text{COD})_2]\text{BF}_4$  (3.1 mg, 0.0075 mmol, 3.0 mol %), BINAP (4.7 mg, 0.0075 mmol, 3.0 mol %), and CsOAc (120 mg, 1.25 mmol, 2.5 equiv) were added to a 4 mL vial equipped with a stir bar. After purging with with nitrogen, to the vial was added sequentially benzene (0.2 mL), pyrrolidine (82  $\mu\text{L}$ , 0.75 mmol, 3.0 equiv), styrene (145  $\mu\text{L}$ , 1.25 mmol, 5.0 equiv), cinnamyl alcohol (32  $\mu\text{L}$ , 0.25 mmol, 1.0 equiv) and DI water (0.2 mL). The resulting solution was allowed to stir for 4 h at 80 °C. Then, the reaction vial was cooled to room temperature followed by the addition of diphenylmethane as an internal standard for analysis of the crude reaction mixture. The biphasic solution was added EtOAc, dried over anhydrous  $\text{MgSO}_4$ , and filtered. The solution was concentrated *in vacuo* and then purified by silica gel chromatography (2:1 hexanes/EtOAc) to afford a colorless liquid in 81% yield.

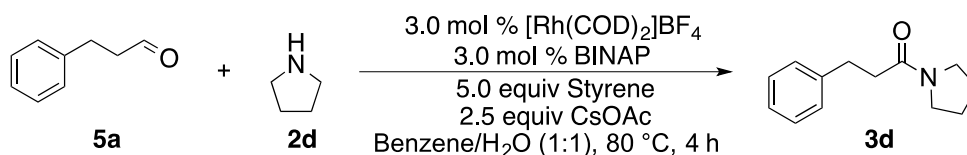

**3-phenyl-1-(pyrrolidin-1-yl)propan-1-one (Table 1, 3d):**  $[\text{Rh}(\text{COD})_2]\text{BF}_4$  (3.1 mg, 0.0075 mmol, 3.0 mol %), BINAP (4.7 mg, 0.0075 mmol, 3.0 mol %), and CsOAc (120 mg, 1.25 mmol, 2.5 equiv) were added to a 4 mL vial equipped with a stir bar. After purging with with nitrogen, to the vial was added sequentially benzene (0.2 mL), pyrrolidine (82  $\mu\text{L}$ , 0.75 mmol, 3.0 equiv), styrene (145  $\mu\text{L}$ , 1.25 mmol, 5.0 equiv), 3-phenylpropanal (34  $\mu\text{L}$ , 0.25 mmol, 1.0 equiv) and DI water (0.2 mL). The resulting solution was allowed to stir for 4 h at 80 °C. Then, the reaction vial was cooled to room temperature followed by the addition of diphenylmethane as an internal standard for analysis of the crude reaction mixture. The biphasic solution was added EtOAc, dried over anhydrous  $\text{MgSO}_4$ , and filtered. The solution was concentrated *in vacuo* and then purified by silica gel chromatography (2:1 hexanes/EtOAc) to afford a light yellow liquid in 85% yield.

$R_f = 0.1$

$^1\text{H NMR}$  (400 MHz,  $\text{CDCl}_3$ )  $\delta$ : 7.33 – 7.25 (m, 2H), 7.25 – 7.16 (m, 3H), 3.46 (t,  $J = 6.7$  Hz, 2H), 3.28 (t,  $J = 6.6$  Hz, 2H), 3.06 – 2.91 (m, 2H), 2.64 – 2.50 (m, 2H), 1.96 – 1.75 (m, 4H) ppm.

$^{13}\text{C NMR}$  (101 MHz,  $\text{CDCl}_3$ )  $\delta$ : 170.86, 141.60, 128.54, 128.52, 126.15, 46.65, 45.75, 36.87, 31.31, 26.15, 24.48 ppm.

IR:  $\nu$  2974, 2877, 1638, 1436  $\text{cm}^{-1}$ .

HRMS (ESI-TOF)  $m/z$ :  $[\text{M}+\text{H}^+]$  calculated for  $\text{C}_{13}\text{H}_{18}\text{NO}$ , 204.1388; found, 204.1396.

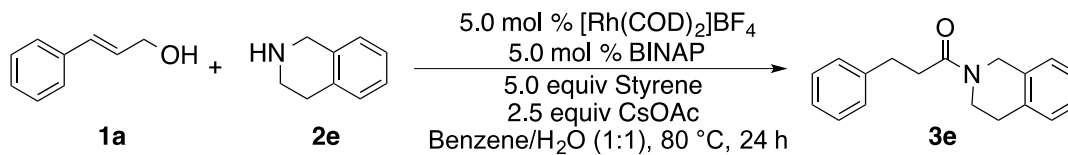

**1-(3,4-dihydroisoquinolin-2(1H)-yl)-3-phenylpropan-1-one (Table 1, 3e):**  $[\text{Rh}(\text{COD})_2]\text{BF}_4$  (5.0 mg, 0.0125 mmol, 5.0 mol %), BINAP (7.8 mg, 0.0125 mmol, 5.0 mol %), and CsOAc (120 mg, 1.25 mmol, 2.5 equiv) were added to a 4 mL vial equipped with a stir bar. After purging with nitrogen, to the vial was added sequentially benzene (0.2 mL), 1,2,3,4-tetrahydroisoquinoline (95  $\mu\text{L}$ , 0.75 mmol, 3.0 equiv), styrene (145  $\mu\text{L}$ , 1.25 mmol, 5.0 equiv), cinnamyl alcohol (32  $\mu\text{L}$ , 0.25 mmol, 1.0 equiv) and DI water (0.2 mL). The resulting solution was allowed to stir for 24 h at 80  $^\circ\text{C}$ . Then, the reaction vial was cooled to room temperature followed by the addition of diphenylmethane as an internal standard for analysis of the crude reaction mixture. The biphasic solution was added EtOAc, dried over anhydrous  $\text{MgSO}_4$ , and filtered. The solution was concentrated *in vacuo* and then purified by silica gel chromatography (4:1 hexanes/EtOAc) to afford a yellow liquid in 81% yield.

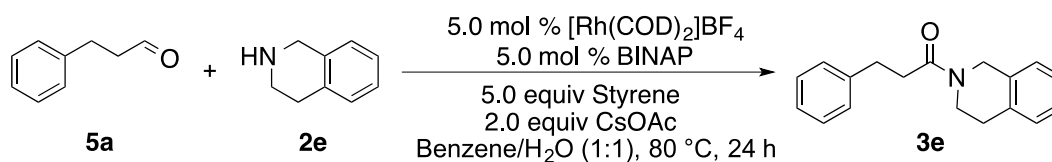

**1-(3,4-dihydroisoquinolin-2(1H)-yl)-3-phenylpropan-1-one (Table 1, 3e):**  $[\text{Rh}(\text{COD})_2]\text{BF}_4$  (5.0 mg, 0.0125 mmol, 5.0 mol %), BINAP (7.8 mg, 0.0125 mmol, 5.0 mol %), and CsOAc (96 mg, 1.00 mmol, 2.0 equiv) were added to a 4 mL vial equipped with a stir bar. After purging with nitrogen, to the vial was added sequentially benzene (0.2 mL), 1,2,3,4-tetrahydroisoquinoline (95  $\mu\text{L}$ , 0.75 mmol, 3.0 equiv), styrene (145  $\mu\text{L}$ , 1.25 mmol, 5.0 equiv), 3-phenylpropanal (34  $\mu\text{L}$ , 0.25 mmol, 1.0 equiv) and DI water (0.2 mL). The resulting solution was allowed to stir for 24 h at 80  $^\circ\text{C}$ . Then, the reaction vial was cooled to room temperature followed by the addition of diphenylmethane as an internal standard for analysis of the crude reaction mixture. The biphasic solution was added EtOAc, dried over anhydrous  $\text{MgSO}_4$ , and filtered. The solution was concentrated *in vacuo* and then purified by silica gel chromatography (4:1 hexanes/EtOAc) to afford a yellow liquid in 72% yield.

$R_f = 0.15$

**$^1\text{H NMR}$**  (500 MHz,  $\text{DMSO}-d_6$ , 60  $^\circ\text{C}$ )  $\delta$ : 7.32 – 7.22 (m, 4H), 7.20 – 7.10 (m, 5H), 4.61 (s, 2H), 3.73 – 3.60 (br, 2H), 2.87 (t,  $J = 7.8$  Hz, 2H), 2.83 – 2.74 (m, 2H), 2.71 (t,  $J = 7.7$  Hz, 2H) ppm.

**$^{13}\text{C NMR}$**  (101 MHz,  $\text{CDCl}_3$ )  $\delta$ : 171.25, 171.13, 141.45, 135.21, 134.19, 133.68, 132.62, 129.03, 128.64, 128.61, 128.56, 128.54, 128.35, 126.99, 126.80, 126.70, 126.63, 126.42, 126.29, 126.27, 126.14, 47.38, 44.38, 43.29, 39.81, 35.95, 35.67, 31.55, 31.49, 29.55, 28.65 ppm (mixture of amide rotamers, two carbon resonances are coincidental).<sup>1</sup>

**IR:**  $\nu$  2937, 2858, 1639, 1441, 1252, 1218  $\text{cm}^{-1}$ .

**HRMS** (ESI-TOF)  $m/z$ :  $[\text{M}+\text{H}^+]$  calculated for  $\text{C}_{18}\text{H}_{20}\text{NO}$ , 266.1545; found, 266.1550.

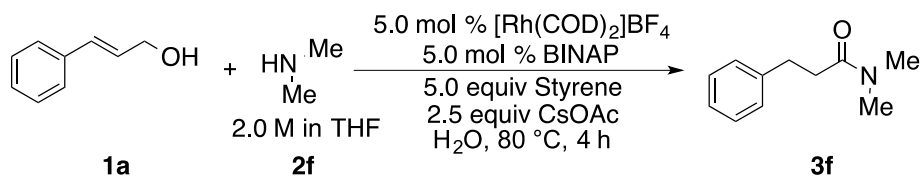

**N,N-dimethyl-3-phenylpropanamide (Table 1, 3f):**  $[\text{Rh}(\text{COD})_2]\text{BF}_4$  (5.0 mg, 0.0125 mmol, 5.0 mol %), BINAP (7.8 mg, 0.0125 mmol, 5.0 mol %), and CsOAc (120 mg, 1.25 mmol, 2.5 equiv) were added to a 4 mL vial equipped with a stir bar. After purging with nitrogen, to the vial was added sequentially diethylamine (2.0 M THF) (375  $\mu\text{L}$ , 0.75 mmol, 3.0 equiv), styrene (145  $\mu\text{L}$ , 1.25 mmol, 5.0 equiv), cinnamyl alcohol (32  $\mu\text{L}$ , 0.25 mmol, 1.0 equiv) and DI water (0.2 mL). The resulting solution was allowed to stir for 4 h at 80  $^\circ\text{C}$ . Then, the reaction vial was cooled to room temperature followed by the addition of diphenylmethane as an internal standard for analysis of the crude reaction mixture. The biphasic solution was added EtOAc, dried over anhydrous  $\text{MgSO}_4$ , and filtered. The solution was concentrated *in vacuo* and then purified by silica gel chromatography (1:1 hexanes/EtOAc) to afford a white solid in 64% yield.

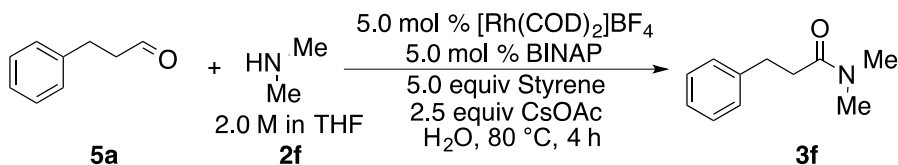

**N,N-dimethyl-3-phenylpropanamide (Table 1, 3f):**  $[\text{Rh}(\text{COD})_2]\text{BF}_4$  (5.0 mg, 0.0125 mmol, 5.0 mol %), BINAP (7.8 mg, 0.0125 mmol, 5.0 mol %), and CsOAc (120 mg, 1.25 mmol, 2.5 equiv) were added to a 4 mL vial equipped with a stir bar. After purging with nitrogen, to the vial was added sequentially diethylamine (2.0 M THF) (375  $\mu\text{L}$ , 0.75 mmol, 3.0 equiv), styrene (145  $\mu\text{L}$ , 1.25 mmol, 5.0 equiv), 3-phenylpropanal (34  $\mu\text{L}$ , 0.25 mmol, 1.0 equiv) and DI water (0.2 mL). The resulting solution was allowed to stir for 4 h at 80  $^\circ\text{C}$ . Then, the reaction vial was cooled to room temperature followed by the addition of diphenylmethane as an internal standard for analysis of the crude reaction mixture. The biphasic solution was added EtOAc, dried over anhydrous  $\text{MgSO}_4$ , and filtered. The solution was concentrated *in vacuo* and then purified by silica gel chromatography (1:1 hexanes/EtOAc) to afford a white solid in 57% yield.

$R_f = 0.25$

$^1\text{H NMR}$  (400 MHz,  $\text{CDCl}_3$ )  $\delta$ : 7.32 – 7.26 (m, 2H), 7.24 – 7.17 (m, 3H), 3.00–2.96 (m, 2H), 2.95 (s, 3H), 2.93 (s, 3H), 2.66 – 2.57 (m, 2H) ppm.

$^{13}\text{C NMR}$  (101 MHz,  $\text{CDCl}_3$ )  $\delta$ : 172.31, 141.60, 128.57, 128.54, 126.20, 37.28, 35.56, 35.45, 31.48 ppm.

**IR:**  $\nu$  2936, 1644, 1496, 1455  $\text{cm}^{-1}$ .

**HRMS** (ESI-TOF)  $m/z$ :  $[\text{M}+\text{H}^+]$  calculated for  $\text{C}_{11}\text{H}_{26}\text{NO}$ , 178.1232; found, 178.1236.

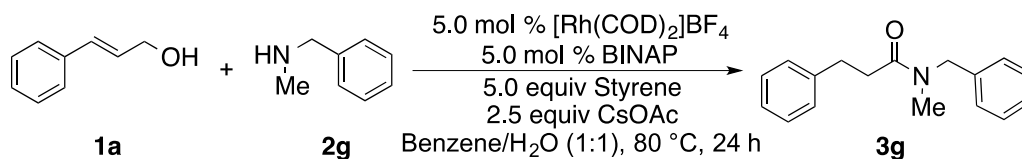

**N-benzyl-N-methyl-3-phenylpropanamide (Table 1, 3g):**  $[\text{Rh}(\text{COD})_2]\text{BF}_4$  (5.0 mg, 0.0125 mmol, 5.0 mol %), BINAP (7.8 mg, 0.0125 mmol, 5.0 mol %), and CsOAc (120 mg, 1.25 mmol, 2.5 equiv) were added to a 4 mL vial equipped with a stir bar. After purging with nitrogen, to the vial was added sequentially benzene (0.2 mL), *N*-methyl-1-phenylmethanamine (97  $\mu\text{L}$ , 0.75 mmol, 3.0 equiv), styrene (145  $\mu\text{L}$ , 1.25 mmol, 5.0 equiv), cinnamyl alcohol (32  $\mu\text{L}$ , 0.25 mmol, 1.0 equiv) and DI water (0.2 mL). The resulting solution was allowed to stir for 24 h at 80  $^\circ\text{C}$ . Then, the reaction vial was cooled to room temperature followed by the addition of diphenylmethane as an internal standard for analysis of the crude reaction mixture. The biphasic solution was added EtOAc, dried over anhydrous  $\text{MgSO}_4$ , and filtered. The solution was concentrated *in vacuo* and then purified by silica gel chromatography (6:1 hexanes/EtOAc) to afford a colorless liquid in 76% yield.

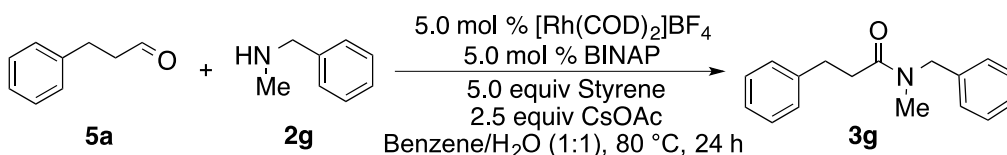

**N-benzyl-N-methyl-3-phenylpropanamide (Table 1, 3g):**  $[\text{Rh}(\text{COD})_2]\text{BF}_4$  (5.0 mg, 0.0125 mmol, 5.0 mol %), BINAP (7.8 mg, 0.0125 mmol, 5.0 mol %), and CsOAc (120 mg, 1.25 mmol, 2.5 equiv) were added to a 4 mL vial equipped with a stir bar. After purging with nitrogen, to the vial was added sequentially benzene (0.2 mL), *N*-methyl-1-phenylmethanamine (97  $\mu\text{L}$ , 0.75 mmol, 3.0 equiv), styrene (145  $\mu\text{L}$ , 1.25 mmol, 5.0 equiv), 3-phenylpropanal (34  $\mu\text{L}$ , 0.25 mmol, 1.0 equiv) and DI water (0.2 mL). The resulting solution was allowed to stir for 24 h at 80  $^\circ\text{C}$ . Then, the reaction vial was cooled to room temperature followed by the addition of diphenylmethane as an internal standard for analysis of the crude reaction mixture. The biphasic solution was added EtOAc, dried over anhydrous  $\text{MgSO}_4$ , and filtered. The solution was concentrated *in vacuo* and then purified by silica gel chromatography (6:1 hexanes/EtOAc) to afford a colorless liquid in 76% yield.

$R_f = 0.15$

$^1\text{H NMR}$  (400 MHz,  $\text{CDCl}_3$ , mixture of amide rotamers) $^2$   $\delta$ : 7.42 – 7.15 (m, 9H), 7.13 – 7.05 (m, 1H), 4.61 (s, 1.1H), 4.47 (s, 0.8H), 3.09 – 2.98 (m, 2H), 2.96 (s, 1.1H), 2.85 (s, 1.8H), 2.74 – 2.65 (m, 2H) ppm.

$^{13}\text{C NMR}$  (101 MHz,  $\text{CDCl}_3$ , mixture of amide rotamers) $^2$   $\delta$ : 172.69, 172.36, 141.49, 141.41, 137.47, 136.64, 129.02, 128.67, 128.59, 128.57, 128.15, 127.68, 127.42, 126.33, 126.24, 126.22, 53.34, 50.96, 35.52, 35.09, 34.85, 34.10, 31.66, 31.49 ppm.

**IR:**  $\nu$  2926, 2856, 1644, 1495, 1453  $\text{cm}^{-1}$ .

**HRMS** (ESI-TOF)  $m/z$ :  $[\text{M}+\text{H}^+]$  calculated for  $\text{C}_{17}\text{H}_{20}\text{NO}$ , 254.1545; found, 254.1547.

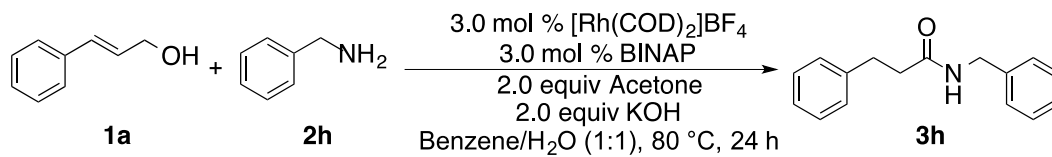

**N-benzyl-3-phenylpropanamide (Table 1, 3h):**  $[\text{Rh}(\text{COD})_2]\text{BF}_4$  (3.1 mg, 0.0075 mmol, 3.0 mol %), BINAP (4.7 mg, 0.0075 mmol, 3.0 mol %), and KOH (28 mg, 0.50 mmol, 2.0 equiv) were added to a 4 mL vial equipped with a stir bar. After purging with with nitrogen, to the vial was added sequentially benzene (0.2 mL), benzylamine (82  $\mu\text{L}$ , 0.75 mmol, 3.0 equiv), acetone (36  $\mu\text{L}$ , 0.50 mmol, 2.0 equiv), cinnamyl alcohol (32  $\mu\text{L}$ , 0.25 mmol, 1.0 equiv) and DI water (0.2 mL). The resulting solution was allowed to stir for 24 h at 80  $^\circ\text{C}$ . Then, the reaction vial was cooled to room temperature followed by the addition of diphenylmethane as an internal standard for analysis of the crude reaction mixture. The biphasic solution was added EtOAc, dried over anhydrous  $\text{MgSO}_4$ , and filtered. The solution was concentrated *in vacuo* and then purified by silica gel chromatography (4:1 hexanes/EtOAc) to afford a white solid in 80% yield.

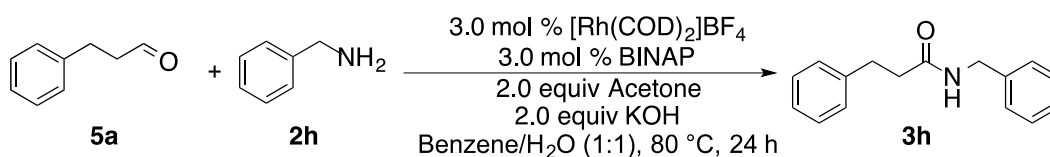

**N-benzyl-3-phenylpropanamide (Table 1, 3h):**  $[\text{Rh}(\text{COD})_2]\text{BF}_4$  (3.1 mg, 0.0075 mmol, 3.0 mol %), BINAP (4.7 mg, 0.0075 mmol, 3.0 mol %), and KOH (28 mg, 0.50 mmol, 2.0 equiv) were added to a 4 mL vial equipped with a stir bar. After purging with with nitrogen, to the vial was added sequentially benzene (0.2 mL), benzylamine (82  $\mu\text{L}$ , 0.75 mmol, 3.0 equiv), acetone (36  $\mu\text{L}$ , 0.50 mmol, 2.0 equiv), 3-phenyl-propanal (34  $\mu\text{L}$ , 0.25 mmol, 1.0 equiv) and DI water (0.2 mL). The resulting solution was allowed to stir for 24 h at 80  $^\circ\text{C}$ . Then, the reaction vial was cooled to room temperature followed by the addition of diphenylmethane as an internal standard for analysis of the crude reaction mixture. The biphasic solution was added EtOAc, dried over anhydrous  $\text{MgSO}_4$ , and filtered. The solution was concentrated *in vacuo* and then purified by silica gel chromatography (4:1 hexanes/EtOAc) to afford a white solid in 72% yield.

$R_f = 0.25$

**mp** = 80-83  $^\circ\text{C}$  (reported mp = 81-83  $^\circ\text{C}$ )<sup>3</sup>

**$^1\text{H}$  NMR** (400 MHz,  $\text{CDCl}_3$ )  $\delta$ : 7.33 – 7.23 (m, 5H), 7.23 – 7.18 (m, 3H), 7.18 – 7.12 (m, 2H), 5.59 (bs, 1H), 4.40 (d,  $J = 5.7$  Hz, 2H), 3.00 (t,  $J = 7.6$  Hz, 2H), 2.52 (t,  $J = 7.6$  Hz, 2H) ppm.

**$^{13}\text{C}$  NMR** (101 MHz,  $\text{CDCl}_3$ )  $\delta$ : 171.94, 140.89, 138.24, 128.80, 128.70, 128.54, 127.89, 127.61, 126.40, 43.73, 38.71, 31.87 ppm.

**IR:**  $\nu$  3293, 3031, 2928, 1639, 1545  $\text{cm}^{-1}$ .

**HRMS** (ESI-TOF)  $m/z$ :  $[\text{M}+\text{H}^+]$  calculated for  $\text{C}_{16}\text{H}_{18}\text{NO}$ , 240.1388; found, 240.1393.



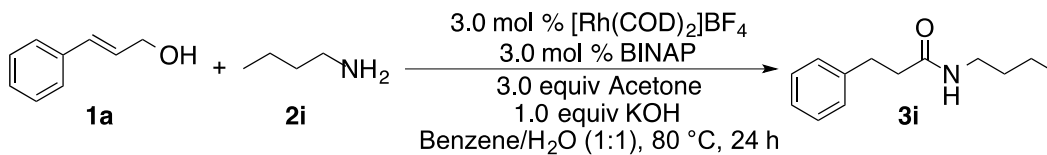

**N-Butyl-3-phenylpropanamide (Table 1, 3i):**  $[\text{Rh}(\text{COD})_2]\text{BF}_4$  (3.1 mg, 0.0075 mmol, 3.0 mol %), BINAP (4.7 mg, 0.0075 mmol, 3.0 mol %), and KOH (14 mg, 0.25 mmol, 1.0 equiv) were added to a 4 mL vial equipped with a stir bar. After purging with nitrogen, to the vial was added sequentially benzene (0.2 mL), *n*-butylamine (74  $\mu\text{L}$ , 0.75 mmol, 3.0 equiv), acetone (54  $\mu\text{L}$ , 0.75 mmol, 3.0 equiv), cinnamyl alcohol (32  $\mu\text{L}$ , 0.25 mmol, 1.0 equiv) and DI water (0.2 mL). The resulting solution was allowed to stir for 24 h at 80 °C. Then, the reaction vial was cooled to room temperature followed by the addition of diphenylmethane as an internal standard for analysis of the crude reaction mixture. The biphasic solution was added EtOAc, dried over anhydrous  $\text{MgSO}_4$ , and filtered. The solution was concentrated *in vacuo* and then purified by silica gel chromatography (3:1 hexanes/EtOAc) to afford a light yellow liquid in 72% yield.

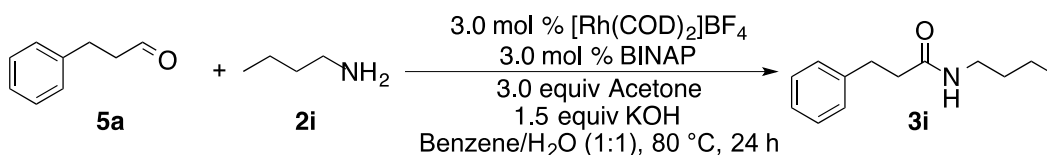

**N-Butyl-3-phenylpropanamide (Table 1, 3i):**  $[\text{Rh}(\text{COD})_2]\text{BF}_4$  (3.1 mg, 0.0075 mmol, 3.0 mol %), BINAP (4.7 mg, 0.0075 mmol, 3.0 mol %), and KOH (21 mg, 0.38 mmol, 1.5 equiv) were added to a 4 mL vial equipped with a stir bar. After purging with nitrogen, to the vial was added sequentially benzene (0.2 mL), *n*-butylamine (74  $\mu\text{L}$ , 0.75 mmol, 3.0 equiv), acetone (54  $\mu\text{L}$ , 0.75 mmol, 3.0 equiv), 3-phenylpropanal (34  $\mu\text{L}$ , 0.25 mmol, 1.0 equiv) and DI water (0.2 mL). The resulting solution was allowed to stir for 24 h at 80 °C. Then, the reaction vial was cooled to room temperature followed by the addition of diphenylmethane as an internal standard for analysis of the crude reaction mixture. The biphasic solution was added EtOAc, dried over anhydrous  $\text{MgSO}_4$ , and filtered. The solution was concentrated *in vacuo* and then purified by silica gel chromatography (3:1 hexanes/EtOAc) to afford a light yellow liquid in 63% yield.

$R_f = 0.2$

$^1\text{H NMR}$  (400 MHz,  $\text{CDCl}_3$ )  $\delta$ : 7.30 – 7.24 (m, 2H), 7.21 – 7.14 (m, 3H), 5.28 (bs, 1H), 3.18 (td,  $J = 7.2, 5.7$  Hz, 2H), 2.94 (t,  $J = 7.7$  Hz, 2H), 2.44 (t,  $J = 7.7$  Hz, 2H), 1.46 – 1.30 (m, 2H), 1.31 – 1.16 (m, 2H), 0.86 (t,  $J = 7.3$  Hz, 3H) ppm.

$^{13}\text{C NMR}$  (126 MHz,  $\text{CDCl}_3$ )  $\delta$ : 172.12, 141.03, 128.62, 128.47, 126.32, 39.35, 38.74, 31.94, 31.74, 20.10, 13.86 ppm.

IR:  $\nu$  3301, 2962, 2932, 1643, 1554  $\text{cm}^{-1}$ .

HRMS (ESI-TOF)  $m/z$ :  $[\text{M}+\text{H}^+]$  calculated for  $\text{C}_{13}\text{H}_{20}\text{NO}$ , 206.1545; found, 206.1548.

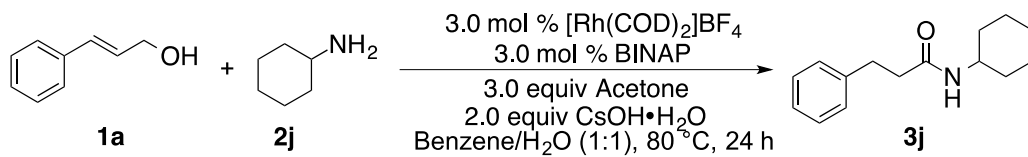

**N-Cyclohexyl-3-phenylpropanamide (Table 3j):**  $[\text{Rh}(\text{COD})_2]\text{BF}_4$  (3.1 mg, 0.0075 mmol, 3.0 mol %), BINAP (4.7 mg, 0.0075 mmol, 3.0 mol %), and  $\text{CsOH}\cdot\text{H}_2\text{O}$  (84 mg, 0.50 mmol, 2.0 equiv) were added to a 4 mL vial equipped with a stir bar. After purging with nitrogen, to the vial was added sequentially benzene (0.2 mL), cyclohexylamine (86  $\mu\text{L}$ , 0.75 mmol, 3.0 equiv), acetone (54  $\mu\text{L}$ , 0.75 mmol, 3.0 equiv), cinnamyl alcohol (32  $\mu\text{L}$ , 0.25 mmol, 1.0 equiv) and DI water (0.2 mL). The resulting solution was allowed to stir for 24 h at 80 °C. Then, the reaction vial was cooled to room temperature followed by the addition of diphenylmethane as an internal standard for analysis of the crude reaction mixture. The biphasic solution was added EtOAc, dried over anhydrous  $\text{MgSO}_4$ , and filtered. The solution was concentrated *in vacuo* and then purified by silica gel chromatography (4:1 hexanes/EtOAc) to afford a white solid in 54% yield.

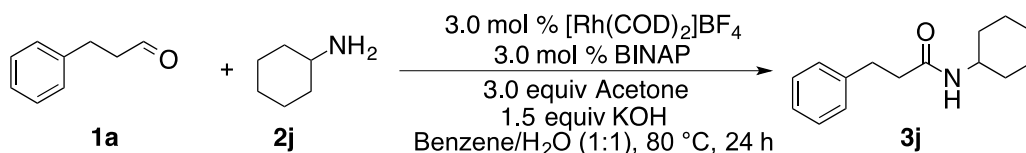

**N-Cyclohexyl-3-phenylpropanamide (Table 1, 3j):**  $[\text{Rh}(\text{COD})_2]\text{BF}_4$  (3.1 mg, 0.0075 mmol, 3.0 mol %), BINAP (4.7 mg, 0.0075 mmol, 3.0 mol %), and KOH (21 mg, 0.38 mmol, 1.5 equiv) were added to a 4 mL vial equipped with a stir bar. After purging with nitrogen, to the vial was added sequentially benzene (0.2 mL), *n*-butylamine (74  $\mu\text{L}$ , 0.75 mmol, 3.0 equiv), acetone (54  $\mu\text{L}$ , 0.75 mmol, 3.0 equiv), 3-phenylpropanal (34  $\mu\text{L}$ , 0.25 mmol, 1.0 equiv) and DI water (0.2 mL). The resulting solution was allowed to stir for 24 h at 80 °C. Then, the reaction vial was cooled to room temperature followed by the addition of diphenylmethane as an internal standard for analysis of the crude reaction mixture. The biphasic solution was added EtOAc, dried over anhydrous  $\text{MgSO}_4$ , and filtered. The solution was concentrated *in vacuo* and then purified by silica gel chromatography (4:1 hexanes/EtOAc) to afford a white solid in 48% yield.

$R_f = 0.2$

**mp** = 107-108 °C (reported mp = 113-114 °C)<sup>4</sup>

**$^1\text{H}$  NMR** (500 MHz,  $\text{CDCl}_3$ )  $\delta$ : 7.31 – 7.26 (m, 2H), 7.23 – 7.17 (m, 3H), 5.12 (s, 1H), 3.79– 3.69 (m, 1H), 2.96 (t,  $J = 7.7$  Hz, 2H), 2.43 (t,  $J = 7.6$  Hz, 2H), 1.87 – 1.78 (m, 2H), 1.69 – 1.61 (m, 2H), 1.58 (ddd,  $J = 7.8, 3.9$  Hz, 1H), 1.39 – 1.28 (m, 2H), 1.11 (ddt,  $J = 12.8, 3.5$  Hz, 1H), 1.00 (ddd,  $J = 12.0, 3.6$  Hz, 2H) ppm.

**$^{13}\text{C}$  NMR** (126 MHz,  $\text{CDCl}_3$ )  $\delta$ : 171.13, 141.07, 128.63, 128.55, 126.34, 48.17, 39.00, 33.27, 32.04, 25.65, 24.95 ppm.

**IR:**  $\nu$  3303, 2939, 2850, 1636, 1543  $\text{cm}^{-1}$ .

**HRMS** (ESI-TOF)  $m/z$ :  $[\text{M}+\text{H}^+]$  calculated for  $\text{C}_{15}\text{H}_{22}\text{NO}$ , 232.1701; found, 232.1704.

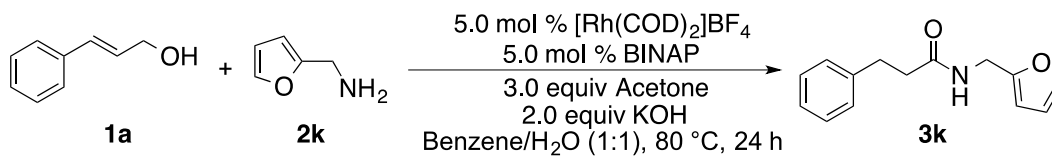

**N-(furan-2-ylmethyl)-3-phenylpropanamide (Table 1, 3k)** [Rh(COD)<sub>2</sub>]BF<sub>4</sub> (5.0 mg, 0.0125 mmol, 5.0 mol %) and BINAP (7.8 mg, 0.0125 mmol, 5.0 mol %) and KOH (28 mg, 0.50 mmol, 2.0 equiv) were added to a 4 mL vial equipped with a stir bar. After purging with nitrogen, to the vial was added sequentially benzene (0.2 mL), furan-2-ylmethanamine (70  $\mu$ L, 0.75 mmol, 3.0 equiv), acetone (54  $\mu$ L, 0.75 mmol, 3.0 equiv), cinnamyl alcohol (32  $\mu$ L, 0.25 mmol, 1.0 equiv) and DI water (0.2 mL). The resulting solution was allowed to stir for 24 h at 80  $^\circ$ C. Then, the reaction vial was cooled to room temperature followed by the addition of diphenylmethane as an internal standard for analysis of the crude reaction mixture. The biphasic solution was added EtOAc, dried over anhydrous MgSO<sub>4</sub>, and filtered. The solution was concentrated *in vacuo* and then purified by silica gel chromatography (4:1 hexanes/EtOAc) to afford a white solid in 73% yield.

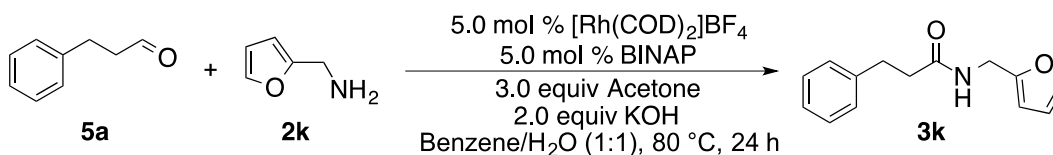

**N-(furan-2-ylmethyl)-3-phenylpropanamide (Table 1, 3k)** [Rh(COD)<sub>2</sub>]BF<sub>4</sub> (5.0 mg, 0.0125 mmol, 5.0 mol %) and BINAP (7.8 mg, 0.0125 mmol, 5.0 mol %) and KOH (28 mg, 0.50 mmol, 2.0 equiv) were added to a 4 mL vial equipped with a stir bar. After purging with nitrogen, to the vial was added sequentially benzene (0.2 mL), furan-2-ylmethanamine (70  $\mu$ L, 0.75 mmol, 3.0 equiv), acetone (54  $\mu$ L, 0.75 mmol, 3.0 equiv), 3-phenylpropanal (34  $\mu$ L, 0.25 mmol, 1.0 equiv) and DI water (0.2 mL). The resulting solution was allowed to stir for 24 h at 80  $^\circ$ C. Then, the reaction vial was cooled to room temperature followed by the addition of diphenylmethane as an internal standard for analysis of the crude reaction mixture. The biphasic solution was added EtOAc, dried over anhydrous MgSO<sub>4</sub>, and filtered. The solution was concentrated *in vacuo* and then purified by silica gel chromatography (4:1 hexanes/EtOAc) to afford a white solid in 66% yield.

**R<sub>f</sub>** = 0.1

**mp** = 51-53  $^\circ$ C (reported mp = 56-58  $^\circ$ C)<sup>10</sup>

**<sup>1</sup>H NMR** (400 MHz, CDCl<sub>3</sub>)  $\delta$ : 7.46 – 7.10 (m, 6H), 6.46 – 6.21 (m, 1H), 6.16 (d, *J* = 3.3 Hz, 1H), 5.62 (bs, 1H), 4.41 (d, *J* = 5.6 Hz, 2H), 2.98 (t, *J* = 7.7 Hz, 2H), 2.49 (t, *J* = 7.7 Hz, 2H).

**<sup>13</sup>C NMR** (126 MHz, CDCl<sub>3</sub>)  $\delta$ : 171.88, 151.32, 142.30, 140.87, 128.67, 128.47, 126.37, 110.57, 107.57, 38.52, 36.60, 31.74.

**IR**:  $\nu$  3311, 2961, 2930, 2869, 1638, 1534.

**HRMS** (ESI-TOF) *m/z*: [M+H<sup>+</sup>] calculated for C<sub>13</sub>H<sub>20</sub>NO, 230.1181; found, 230.1174.

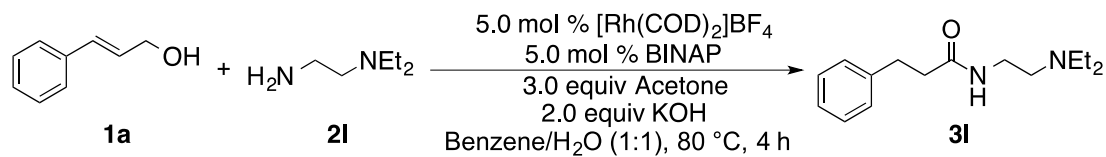

**N-(2-(diethylamino)ethyl)-3-phenylpropanamide (Table 1, 3I):**  $[\text{Rh}(\text{COD})_2]\text{BF}_4$  (5.0 mg, 0.0125 mmol, 5.0 mol %) and BINAP (7.8 mg, 0.0125 mmol, 5.0 mol %) and KOH (28 mg, 0.50 mmol, 2.0 equiv) were added to a 4 mL vial equipped with a stir bar. After purging with nitrogen, to the vial was added sequentially benzene (0.2 mL), N, N-diethylethane-1,2-diamine (105  $\mu\text{L}$ , 0.75 mmol, 3.0 equiv), acetone (54  $\mu\text{L}$ , 0.75 mmol, 3.0 equiv), cinnamyl alcohol (32  $\mu\text{L}$ , 0.25 mmol, 1.0 equiv) and DI water (0.2 mL). The resulting solution was allowed to stir for 4 h at 80  $^\circ\text{C}$ . Then, the reaction vial was cooled to room temperature followed by the addition of diphenylmethane as an internal standard for analysis of the crude reaction mixture. The biphasic solution was added EtOAc, extracted with 1 M HCl solution three times. The combined water layer was basified by adding 2 M NaOH solution until pH > 10, then extracted with DCM three times. The combined organic layers were dried over anhydrous  $\text{MgSO}_4$ , filtered and concentrated *in vacuo* to afford a yellow liquid in 73% yield.

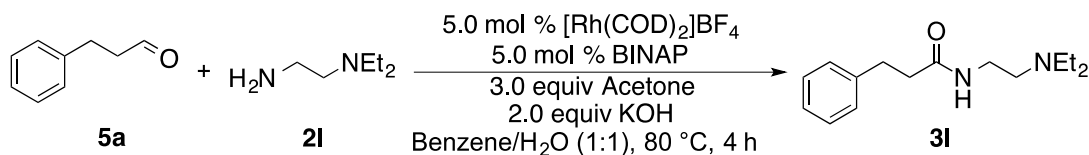

**N-(2-(diethylamino)ethyl)-3-phenylpropanamide (Table 1, 3I):**  $[\text{Rh}(\text{COD})_2]\text{BF}_4$  (5.0 mg, 0.0125 mmol, 5.0 mol %) and BINAP (7.8 mg, 0.0125 mmol, 5.0 mol %) and KOH (28 mg, 0.50 mmol, 2.0 equiv) were added to a 4 mL vial equipped with a stir bar. After purging with nitrogen, to the vial was added sequentially benzene (0.2 mL), N, N-diethylethane-1,2-diamine (105  $\mu\text{L}$ , 0.75 mmol, 3.0 equiv), acetone (54  $\mu\text{L}$ , 0.75 mmol, 3.0 equiv), 3-phenylpropanal (34  $\mu\text{L}$ , 0.25 mmol, 1.0 equiv) and DI water (0.2 mL). The resulting solution was allowed to stir for 4 h at 80  $^\circ\text{C}$ . Then, the reaction vial was cooled to room temperature followed by the addition of diphenylmethane as an internal standard for analysis of the crude reaction mixture. The biphasic solution was added EtOAc, extracted with 1 M HCl solution three times. The combined water layer was basified by adding 2 M NaOH solution until pH > 10, then extracted with DCM three times. The combined organic layers were dried over anhydrous  $\text{MgSO}_4$ , filtered and concentrated *in vacuo* to afford a yellow liquid in 65% yield.

$R_f = 0.1$

$^1\text{H NMR}$  (400 MHz, Benzene- $d_6$ )  $\delta$ : 7.15 – 7.09 (m, 2H), 7.09 – 7.00 (m, 3H), 5.39 (bs, 1H), 3.20 (q,  $J = 5.7$  Hz, 2H), 2.95 (t,  $J = 7.6$  Hz, 2H), 2.19 (q,  $J = 7.1$  Hz, 4H), 2.15 – 2.08 (m, 4H), 0.78 (t,  $J = 7.1$  Hz, 6H).

$^{13}\text{C NMR}$  (101 MHz,  $\text{CDCl}_3$ )  $\delta$ : 172.09, 141.12, 128.60, 128.47, 126.28, 51.41, 46.70, 38.64, 36.91, 31.91, 11.84.

**IR:**  $\nu$  3304, 2971, 2937, 1647, 1554.

**HRMS** (ESI-TOF)  $m/z$ :  $[\text{M}+\text{H}^+]$  calculated for  $\text{C}_{13}\text{H}_{20}\text{NO}$ , 246.1967; found, 246.1968.

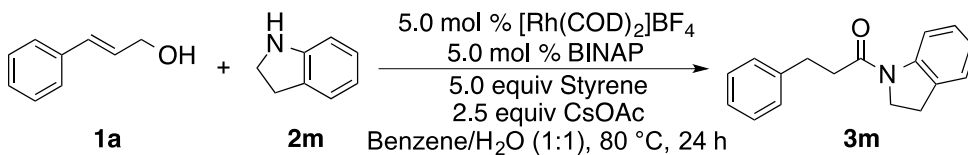

**1-(indolin-1-yl)-3-phenylpropan-1-one (Table 1, 3m):**  $[\text{Rh}(\text{COD})_2]\text{BF}_4$  (5.0 mg, 0.0125 mmol, 5.0 mol %), BINAP (7.8 mg, 0.0125 mmol, 5.0 mol %), and CsOAc (120 mg, 1.25 mmol, 2.5 equiv) were added to a 4 mL vial equipped with a stir bar. After purging with nitrogen, to the vial was added sequentially benzene (0.2 mL), indoline (84  $\mu\text{L}$ , 0.75 mmol, 3.0 equiv), styrene (145  $\mu\text{L}$ , 1.25 mmol, 5.0 equiv), cinnamyl alcohol (32  $\mu\text{L}$ , 0.25 mmol, 1.0 equiv) and DI water (0.2 mL). The resulting solution was allowed to stir for 24 h at 80  $^\circ\text{C}$ . Then, the reaction vial was cooled to room temperature followed by the addition of diphenylmethane as an internal standard for analysis of the crude reaction mixture. The biphasic solution was added EtOAc, extracted with 1 M HCl three times. The combined organic layer was dried over anhydrous  $\text{MgSO}_4$ , filtered and concentrated *in vacuo* and then purified by silica gel chromatography (10:1 hexanes/EtOAc) to afford a white solid in 73% yield.

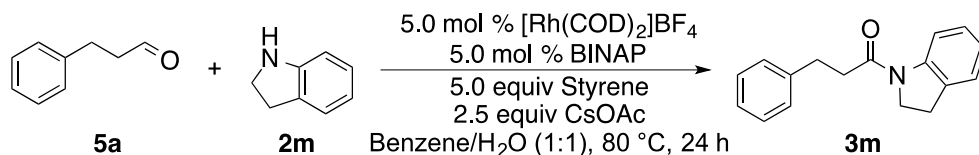

**1-(indolin-1-yl)-3-phenylpropan-1-one (Table 1, 3m):**  $[\text{Rh}(\text{COD})_2]\text{BF}_4$  (5.0 mg, 0.0125 mmol, 5.0 mol %), BINAP (7.8 mg, 0.0125 mmol, 5.0 mol %), and CsOAc (120 mg, 1.25 mmol, 2.5 equiv) were added to a 4 mL vial equipped with a stir bar. After purging with nitrogen, to the vial was added sequentially benzene (0.2 mL), indoline (84  $\mu\text{L}$ , 0.75 mmol, 3.0 equiv), styrene (145  $\mu\text{L}$ , 1.25 mmol, 5.0 equiv), 3-phenylpropanal (34  $\mu\text{L}$ , 0.25 mmol, 1.0 equiv) and DI water (0.2 mL). The resulting solution was allowed to stir for 24 h at 80  $^\circ\text{C}$ . Then, the reaction vial was cooled to room temperature followed by the addition of diphenylmethane as an internal standard for analysis of the crude reaction mixture. The biphasic solution was added EtOAc, extracted with 1 M HCl three times. The combined organic layer was dried over anhydrous  $\text{MgSO}_4$ , filtered and concentrated *in vacuo* and then purified by silica gel chromatography (10:1 hexanes/EtOAc) to afford a white solid in 83% yield.

$R_f = 0.1$        $\text{mp} = 112\text{--}113\text{ }^\circ\text{C}$

**$^1\text{H}$  NMR** (500 MHz,  $\text{CDCl}_3$ , mixture of amide rotamers)<sup>9</sup>  $\delta$ : 8.27 (d,  $J = 8.0$  Hz, 1H), 7.43 – 7.25 (m, 4H), 7.20 (m, 3H, overlapping peaks), 7.01 (t,  $J = 7.4$  Hz, 1H), 4.16 (t,  $J = 7.9$  Hz, 0.2H, minor rotamer), 3.97 (t,  $J = 8.5$  Hz, 2H, major rotamer), 3.15 (t,  $J = 8.5$  Hz, 2H), 3.08 (t,  $J = 7.8$  Hz, 2H, major rotamer), 2.99 (t,  $J = 8.0$  Hz, 0.2H minor rotamer), 2.74 (t,  $J = 7.9$  Hz, 2H).

**$^{13}\text{C}$  NMR** (126 MHz,  $\text{CDCl}_3$ ) (major rotamer)  $\delta$ : 170.50, 143.12, 141.37, 131.16, 128.68, 128.59, 127.69, 126.33, 124.63, 123.71, 117.16, 48.08, 38.07, 30.92, 28.16.

**IR:**  $\nu$  3064, 2929, 1654, 1483.

**HRMS** (ESI-TOF)  $m/z$ :  $[\text{M}+\text{H}^+]$  calculated for  $\text{C}_{17}\text{H}_{18}\text{NO}$ , 252.1388; found, 252.1390.

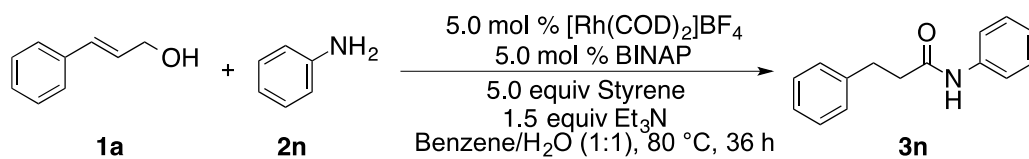

**N,3-diphenylpropanamide (Table 1, 3n):** [Rh(COD)<sub>2</sub>]<sub>2</sub>BF<sub>4</sub> (5.0 mg, 0.0125 mmol, 5.0 mol %) and BINAP (7.8 mg, 0.0125 mmol, 5.0 mol %) were added to a 4 mL vial equipped with a stir bar. After purging with with nitrogen, to the vial was added sequentially benzene (0.2 mL), aniline (68  $\mu$ L, 0.75 mmol, 3.0 equiv), styrene (145  $\mu$ L, 1.25 mmol, 5.0 equiv), triethylamine (53  $\mu$ L, 0.38 mmol, 1.5 equiv), cinnamyl alcohol (32  $\mu$ L, 0.25 mmol, 1.0 equiv) and DI water (0.2 mL). The resulting solution was allowed to stir for 36 h at 80  $^\circ$ C. Then, the reaction vial was cooled to room temperature followed by the addition of diphenylmethane as an internal standard for analysis of the crude reaction mixture. The biphasic solution was added EtOAc, dried over anhydrous MgSO<sub>4</sub>, and filtered. The solution was concentrated *in vacuo* and then purified by silica gel chromatography (4:1 hexanes/EtOAc) to afford a white solid in 55% yield.

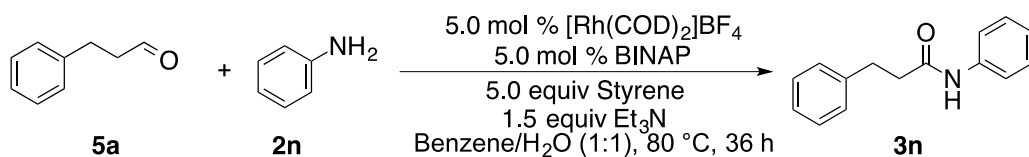

**N,3-diphenylpropanamide (Table 1, 3n):** [Rh(COD)<sub>2</sub>]<sub>2</sub>BF<sub>4</sub> (5.0 mg, 0.0125 mmol, 5.0 mol %) and BINAP (7.8 mg, 0.0125 mmol, 5.0 mol %) were added to a 4 mL vial equipped with a stir bar. After purging with with nitrogen, to the vial was added sequentially benzene (0.2 mL), aniline (68  $\mu$ L, 0.75 mmol, 3.0 equiv), styrene (145  $\mu$ L, 1.25 mmol, 5.0 equiv), triethylamine (53  $\mu$ L, 0.38 mmol, 1.5 equiv), 3-phenylpropanal (34  $\mu$ L, 0.25 mmol, 1.0 equiv) and DI water (0.2 mL). The resulting solution was allowed to stir for 36 h at 80  $^\circ$ C. Then, the reaction vial was cooled to room temperature followed by the addition of diphenylmethane as an internal standard for analysis of the crude reaction mixture. The biphasic solution was added EtOAc, dried over anhydrous MgSO<sub>4</sub>, and filtered. The solution was concentrated *in vacuo* and then purified by silica gel chromatography (4:1 hexanes/EtOAc) to afford a white solid in 59% yield.

**R<sub>f</sub>** = 0.3

**mp** = 92-94  $^\circ$ C (reported mp = 95-96  $^\circ$ C)<sup>5</sup>

**<sup>1</sup>H NMR** (500 MHz, CDCl<sub>3</sub>)  $\delta$ : 7.43 (d, J = 8.0 Hz, 2H), 7.34 – 7.27 (m, 4H), 7.25 – 7.20 (m, 3H), 7.10 (t, J = 7.4 Hz, 1H), 6.96 (bs, 1H), 3.07 (t, J = 7.6 Hz, 2H), 2.67 (t, J = 7.6 Hz, 2H) ppm.

**<sup>13</sup>C NMR** (101 MHz, CDCl<sub>3</sub>)  $\delta$ : 170.49, 140.82, 137.88, 129.18, 128.86, 128.61, 126.61, 124.51, 120.07, 39.74, 31.77 ppm.

**IR:**  $\nu$  3325, 3030, 2930, 2861, 1652, 1600, 1528, 1441 cm<sup>-1</sup>.

**HRMS** (ESI-TOF) *m/z*: [M+H<sup>+</sup>] calculated for C<sub>15</sub>H<sub>16</sub>NO, 226.1232; found, 226.1236.

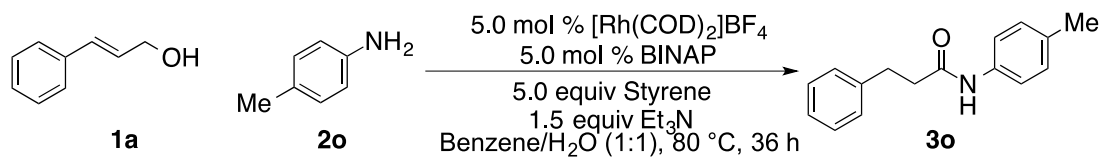

**3-phenyl-*N*-(*p*-tolyl)propanamide (Table 1, **3o**):**  $[\text{Rh}(\text{COD})_2]\text{BF}_4$  (5.0 mg, 0.0125 mmol, 5.0 mol %) and BINAP (7.8 mg, 0.0125 mmol, 5.0 mol %) were added to a 4 mL vial equipped with a stir bar. After purging with with nitrogen, to the vial was added sequentially benzene (0.2 mL), *p*-toluidine (81 mg, 0.75 mmol, 3.0 equiv), styrene (145  $\mu\text{L}$ , 1.25 mmol, 5.0 equiv), triethylamine (53  $\mu\text{L}$ , 0.38 mmol, 1.5 equiv), cinnamyl alcohol (32  $\mu\text{L}$ , 0.25 mmol, 1.0 equiv) and DI water (0.2 mL). The resulting solution was allowed to stir for 36 h at 80 °C. Then, the reaction vial was cooled to room temperature followed by the addition of diphenylmethane as an internal standard for analysis of the crude reaction mixture. The biphasic solution was added EtOAc, extracted with 1 M HCl three times. The combined organic layer was dried over anhydrous  $\text{MgSO}_4$ , filtered and concentrated *in vacuo* and then purified by silica gel chromatography (10:1 hexanes/EtOAc) to afford a white solid in 64% yield.

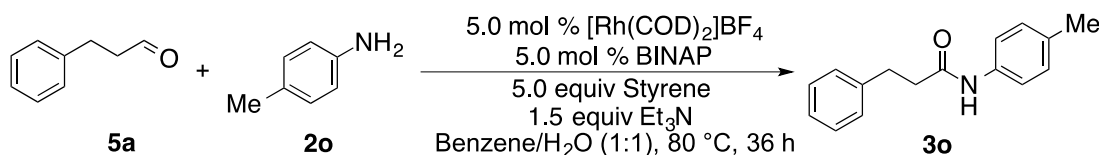

**3-phenyl-*N*-(*p*-tolyl)propanamide (Table 1, **3o**):**  $[\text{Rh}(\text{COD})_2]\text{BF}_4$  (5.0 mg, 0.0125 mmol, 5.0 mol %) and BINAP (7.8 mg, 0.0125 mmol, 5.0 mol %) were added to a 4 mL vial equipped with a stir bar. After purging with with nitrogen, to the vial was added sequentially benzene (0.2 mL), *p*-toluidine (81 mg, 0.75 mmol, 3.0 equiv), styrene (145  $\mu\text{L}$ , 1.25 mmol, 5.0 equiv), triethylamine (53  $\mu\text{L}$ , 0.38 mmol, 1.5 equiv), 3-phenylpropanal (34  $\mu\text{L}$ , 0.25 mmol, 1.0 equiv) and DI water (0.2 mL). The resulting solution was allowed to stir for 36 h at 80 °C. Then, the reaction vial was cooled to room temperature followed by the addition of diphenylmethane as an internal standard for analysis of the crude reaction mixture. The biphasic solution was added EtOAc, extracted with 1 M HCl three times. The combined organic layer was dried over anhydrous  $\text{MgSO}_4$ , filtered and concentrated *in vacuo* and then purified by silica gel chromatography (10:1 hexanes/EtOAc) to afford a white solid in 53% yield.

$R_f = 0.1$

mp = 126–129 °C (reported mp = 129–130 °C)<sup>6</sup>

<sup>1</sup>H NMR (500 MHz,  $\text{CDCl}_3$ )  $\delta$ : 7.33 – 7.28 (m, 4H), 7.26 – 7.20 (m, 3H), 7.10 (d,  $J = 8.0$  Hz, 2H), 6.93 (bs, 1H), 3.06 (t,  $J = 7.6$  Hz, 2H), 2.65 (t,  $J = 7.6$  Hz, 2H), 2.30 (s, 3H) ppm.

<sup>13</sup>C NMR (126 MHz,  $\text{CDCl}_3$ )  $\delta$ : 170.38, 140.83, 135.28, 134.06, 129.57, 128.76, 128.53, 126.49, 120.18, 39.57, 31.75, 20.98 ppm.

IR:  $\nu$  3320, 3027, 2926, 2867, 1654, 1595, 1564  $\text{cm}^{-1}$ .

HRMS (ESI-TOF)  $m/z$ :  $[\text{M}+\text{H}^+]$  calculated for  $\text{C}_{16}\text{H}_{18}\text{NO}$ , 240.1388; found, 240.1391.

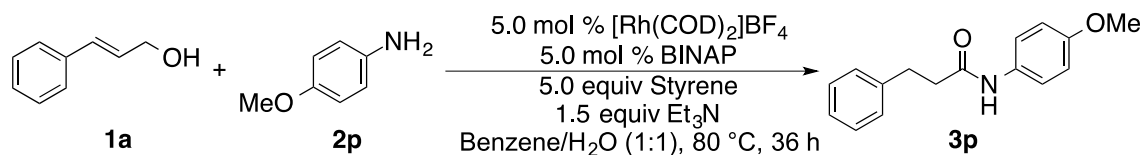

**N-(4-methoxyphenyl)-3-phenylpropanamide (Table 1, 3p):**  $[\text{Rh}(\text{COD})_2]\text{BF}_4$  (5.0 mg, 0.0125 mmol, 5.0 mol %) and BINAP (7.8 mg, 0.0125 mmol, 5.0 mol %) were added to a 4 mL vial equipped with a stir bar. After purging with with nitrogen, to the vial was added sequentially benzene (0.2 mL), 4-methoxyaniline (92 mg, 0.75 mmol, 3.0 equiv), styrene (145  $\mu\text{L}$ , 1.25 mmol, 5.0 equiv), triethylamine (53  $\mu\text{L}$ , 0.38 mmol, 1.5 equiv), cinnamyl alcohol (32  $\mu\text{L}$ , 0.25 mmol, 1.0 equiv) and DI water (0.2 mL). The resulting solution was allowed to stir for 36 h at 80 °C. Then, the reaction vial was cooled to room temperature followed by the addition of diphenylmethane as an internal standard for analysis of the crude reaction mixture. The biphasic solution was added EtOAc, extracted with 1 M HCl three times. The combined organic layer was dried over anhydrous  $\text{MgSO}_4$ , filtered and concentrated *in vacuo* and then purified by silica gel chromatography (10:1 hexanes/EtOAc) to afford a white solid in 53% yield.

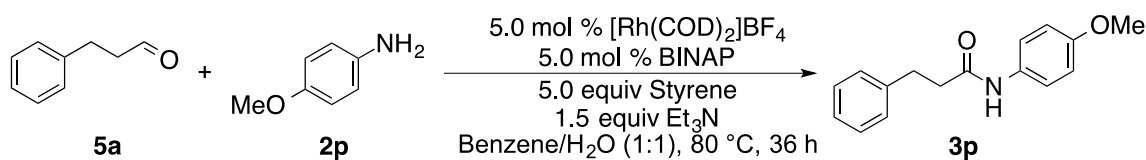

**N-(4-methoxyphenyl)-3-phenylpropanamide (Table 1, 3p):**  $[\text{Rh}(\text{COD})_2]\text{BF}_4$  (5.0 mg, 0.0125 mmol, 5.0 mol %) and BINAP (7.8 mg, 0.0125 mmol, 5.0 mol %) were added to a 4 mL vial equipped with a stir bar. After purging with with nitrogen, to the vial was added sequentially benzene (0.2 mL), 4-methoxyaniline (92 mg, 0.75 mmol, 3.0 equiv), styrene (145  $\mu\text{L}$ , 1.25 mmol, 5.0 equiv), triethylamine (53  $\mu\text{L}$ , 0.38 mmol, 1.5 equiv), 3-phenyl-propanal (34  $\mu\text{L}$ , 0.25 mmol, 1.0 equiv) and DI water (0.2 mL). The resulting solution was allowed to stir for 36 h at 80 °C. Then, the reaction vial was cooled to room temperature followed by the addition of diphenylmethane as an internal standard for analysis of the crude reaction mixture. The biphasic solution was added EtOAc, extracted with 1 M HCl three times. The combined organic layer was dried over anhydrous  $\text{MgSO}_4$ , filtered and concentrated *in vacuo* and then purified by silica gel chromatography (10:1 hexanes/EtOAc) to afford a white solid in 59% yield.

$R_f = 0.15$

**mp** = 127-130 °C (reported mp = 130-131 °C)<sup>7</sup>

**$^1\text{H}$  NMR** (500 MHz,  $\text{CDCl}_3$ )  $\delta$ : 7.35 – 7.28 (m, 4H), 7.26 – 7.20 (m, 3H), 6.88 (bs, 1H), 6.86 – 6.80 (m, 2H), 3.78 (s, 3H), 3.05 (t,  $J = 7.6$  Hz, 2H), 2.64 (t,  $J = 7.6$  Hz, 2H) ppm.

**$^{13}\text{C}$  NMR** (126 MHz,  $\text{CDCl}_3$ )  $\delta$ : 170.36, 156.58, 140.84, 130.91, 128.76, 128.54, 126.50, 122.05, 114.25, 55.61, 39.46, 31.81 ppm.

**IR:**  $\nu$  3288, 2998, 2948, 2845, 1651, 1606, 1508  $\text{cm}^{-1}$ .

**HRMS** (ESI-TOF)  $m/z$ :  $[\text{M}+\text{H}^+]$  calculated for  $\text{C}_{16}\text{H}_{18}\text{NO}_2$ , 256.1338; found, 256.1340.



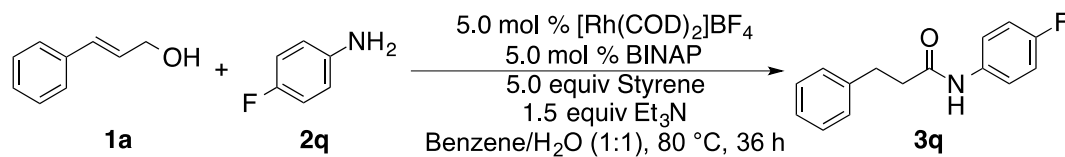

**N-(4-fluorophenyl)-3-phenylpropanamide (Table 1, 3q):**  $[\text{Rh}(\text{COD})_2]\text{BF}_4$  (5.0 mg, 0.0125 mmol, 5.0 mol %) and BINAP (7.8 mg, 0.0125 mmol, 5.0 mol %) were added to a 4 mL vial equipped with a stir bar. After purging with nitrogen, to the vial was added sequentially benzene (0.2 mL), 4-fluoroaniline (71  $\mu\text{L}$ , 0.75 mmol, 3.0 equiv), styrene (145  $\mu\text{L}$ , 1.25 mmol, 5.0 equiv), triethylamine (53  $\mu\text{L}$ , 0.38 mmol, 1.5 equiv), cinnamyl alcohol (32  $\mu\text{L}$ , 0.25 mmol, 1.0 equiv) and DI water (0.2 mL). The resulting solution was allowed to stir for 36 h at 80  $^\circ\text{C}$ . Then, the reaction vial was cooled to room temperature followed by the addition of diphenylmethane as an internal standard for analysis of the crude reaction mixture. The biphasic solution was added EtOAc, extracted with 1 M HCl three times. The combined organic layer was dried over anhydrous  $\text{MgSO}_4$ , filtered and concentrated *in vacuo* and then purified by silica gel chromatography (10:1 hexanes/ EtOAc) to afford a white solid in 66% yield.

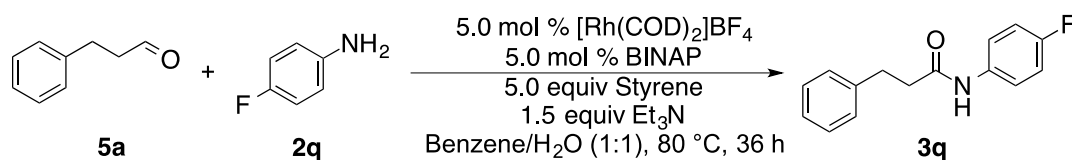

**N-(4-fluorophenyl)-3-phenylpropanamide (Table 1, 3q):**  $[\text{Rh}(\text{COD})_2]\text{BF}_4$  (5.0 mg, 0.0125 mmol, 5.0 mol %) and BINAP (7.8 mg, 0.0125 mmol, 5.0 mol %) were added to a 4 mL vial equipped with a stir bar. After purging with nitrogen, to the vial was added sequentially benzene (0.2 mL), 4-fluoroaniline (71  $\mu\text{L}$ , 0.75 mmol, 3.0 equiv), styrene (145  $\mu\text{L}$ , 1.25 mmol, 5.0 equiv), triethylamine (53  $\mu\text{L}$ , 0.38 mmol, 1.5 equiv), 3-phenylpropanal (34  $\mu\text{L}$ , 0.25 mmol, 1.0 equiv) and DI water (0.2 mL). The resulting solution was allowed to stir for 36 h at 80  $^\circ\text{C}$ . Then, the reaction vial was cooled to room temperature followed by the addition of diphenylmethane as an internal standard for analysis of the crude reaction mixture. The biphasic solution was added EtOAc, extracted with 1 M HCl three times. The combined organic layer was dried over anhydrous  $\text{MgSO}_4$ , filtered and concentrated *in vacuo* and then purified by silica gel chromatography (10:1 hexanes/ EtOAc) to afford a white solid in 56% yield.

$R_f = 0.2$       **mp** = 116-118  $^\circ\text{C}$  (reported mp = 116-118  $^\circ\text{C}$ )<sup>8</sup>

**$^1\text{H}$  NMR** (400 MHz,  $\text{CDCl}_3$ )  $\delta$ : 7.42 – 7.34 (m, 2H), 7.34 – 7.27 (m, 1H), 7.27 – 7.19 (m, 3H), 7.07 – 6.86 (m, 3H), 3.05 (t,  $J = 7.6$  Hz, 2H), 2.65 (t,  $J = 7.6$  Hz, 2H) ppm.

**$^{13}\text{C}$  NMR** (126 MHz,  $\text{CDCl}_3$ )  $\delta$ : 170.47, 159.78 (d,  $^1J_{\text{CF}} = 242.5$  Hz), 140.66, 133.76, 128.81, 128.53, 126.59, 121.94 (d,  $^3J_{\text{CF}} = 8.8$  Hz), 115.72 (d,  $^2J_{\text{CF}} = 21.8$  Hz), 39.48, 31.70 ppm.

**$^{19}\text{F}$  NMR** (470 MHz,  $\text{CDCl}_3$ )  $\delta$ : -118.98 (t,  $^2J_{\text{FH}} = 7.8$  Hz) ppm.

**IR**:  $\nu$  3293, 3072, 3036, 2958, 1652, 1507  $\text{cm}^{-1}$ .

**HRMS** (ESI-TOF)  $m/z$ :  $[\text{M}+\text{H}^+]$  calculated for  $\text{C}_{15}\text{H}_{15}\text{NOF}$ , 244.1138; found, 244.1143.

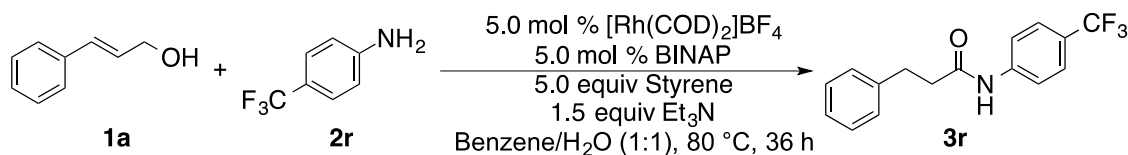

**3-phenyl-N-(4-(trifluoromethyl)phenyl)propanamide (Table 1, 3r):**  $[\text{Rh}(\text{COD})_2]\text{BF}_4$  (5.0 mg, 0.0125 mmol, 5.0 mol %) and BINAP (7.8 mg, 0.0125 mmol, 5.0 mol %) were added to a 4 mL vial equipped with a stir bar. After purging with with nitrogen, to the vial was added sequentially benzene (0.2 mL), 4-(trifluoromethyl)aniline (94  $\mu\text{L}$ , 0.75 mmol, 3.0 equiv), styrene (145  $\mu\text{L}$ , 1.25 mmol, 5.0 equiv), triethylamine (53  $\mu\text{L}$ , 0.38 mmol, 1.5 equiv), cinnamyl alcohol (32  $\mu\text{L}$ , 0.25 mmol, 1.0 equiv) and DI water (0.2 mL). The resulting solution was allowed to stir for 36 h at 80 °C. Then, the reaction vial was cooled to room temperature followed by the addition of diphenylmethane as an internal standard for analysis of the crude reaction mixture. The biphasic solution was added EtOAc, extracted with 1 M HCl three times. The combined organic layer was dried over anhydrous  $\text{MgSO}_4$ , filtered and concentrated *in vacuo* and then purified by silica gel chromatography (10:1 hexanes/EtOAc) to afford a white solid in 41% yield.

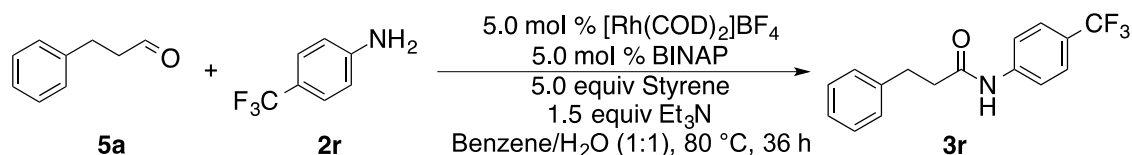

**3-phenyl-N-(4-(trifluoromethyl)phenyl)propanamide (Table 1, 3r):**  $[\text{Rh}(\text{COD})_2]\text{BF}_4$  (5.0 mg, 0.0125 mmol, 5.0 mol %) and BINAP (7.8 mg, 0.0125 mmol, 5.0 mol %) were added to a 4 mL vial equipped with a stir bar. After purging with with nitrogen, to the vial was added sequentially benzene (0.2 mL), 4-(trifluoromethyl)aniline (94  $\mu\text{L}$ , 0.75 mmol, 3.0 equiv), styrene (145  $\mu\text{L}$ , 1.25 mmol, 5.0 equiv), triethylamine (53  $\mu\text{L}$ , 0.38 mmol, 1.5 equiv), 3-phenyl-propanal (34  $\mu\text{L}$ , 0.25 mmol, 1.0 equiv) and DI water (0.2 mL). The resulting solution was allowed to stir for 36 h at 80 °C. Then, the reaction vial was cooled to room temperature followed by the addition of diphenylmethane as an internal standard for analysis of the crude reaction mixture. The biphasic solution was added EtOAc, extracted with 1 M HCl three times. The combined organic layer was dried over anhydrous  $\text{MgSO}_4$ , filtered and concentrated *in vacuo* and then purified by silica gel chromatography (10:1 hexanes/EtOAc) to afford a white solid in 39% yield.

$R_f = 0.1$  mp = 147-150 °C

$^1\text{H NMR}$  (500 MHz,  $\text{CDCl}_3$ )  $\delta$ : 7.55 (s, 4H), 7.36 – 7.28 (m, 2H), 7.26 – 7.20 (m, 3H), 7.08 (bs, 1H), 3.07 (t,  $J = 7.5$  Hz, 2H), 2.70 (t,  $J = 7.6$  Hz, 2H) ppm.

$^{13}\text{C NMR}$  (126 MHz,  $\text{CDCl}_3$ )  $\delta$ : 170.75, 140.82, 140.44, 128.88, 128.51, 126.69, 126.38 (q,  $^3J_{\text{CF}} = 3.8$  Hz), 125.92 (q,  $^2J_{\text{CF}} = 31.2$  Hz), 124.17 (q,  $^1J_{\text{CF}} = 270.0$  Hz), 119.48, 39.66, 31.55 ppm.

$^{19}\text{F NMR}$  (470 MHz,  $\text{CDCl}_3$ )  $\delta$ : -62.20 (s) ppm.

IR:  $\nu$  3329, 3031, 2931, 1673, 1600, 1524  $\text{cm}^{-1}$ .

HRMS (ESI-TOF)  $m/z$ :  $[\text{M}+\text{H}^+]$  calculated for  $\text{C}_{16}\text{H}_{15}\text{NOF}_3$ , 294.1106; found, 294.1106.

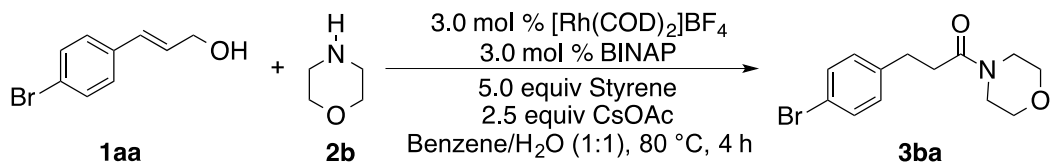

**3-(4-bromophenyl)-1-morpholinopropan-1-one (Table 2, 3ba):**  $[\text{Rh}(\text{COD})_2]\text{BF}_4$  (3.1 mg, 0.0075 mmol, 3.0 mol %), BINAP (4.7 mg, 0.0075 mmol, 3.0 mol %), and CsOAc (120 mg, 1.25 mmol, 2.5 equiv) were added to a 4 mL vial equipped with a stir bar. After purging with nitrogen, to the vial was added sequentially benzene (0.2 mL), morpholine (65  $\mu\text{L}$ , 0.75 mmol, 3.0 equiv), styrene (145  $\mu\text{L}$ , 1.25 mmol, 5.0 equiv), (*E*)-3-(4-bromophenyl)prop-2-en-1-ol (53 mg, 0.25 mmol, 1.0 equiv) and DI water (0.2 mL). The resulting solution was allowed to stir for 4 h at 80  $^\circ\text{C}$ . Then, the reaction vial was cooled to room temperature followed by the addition of diphenylmethane as an internal standard for analysis of the crude reaction mixture. The biphasic solution was added EtOAc, dried over anhydrous  $\text{MgSO}_4$ , and filtered. The solution was concentrated *in vacuo* and then purified by silica gel chromatography (1:1 hexanes/EtOAc) to afford a white solid in 76% yield.

$R_f = 0.1$

mp = 69-71 $^\circ\text{C}$

$^1\text{H NMR}$  (500 MHz,  $\text{CDCl}_3$ )  $\delta$ : 7.46 – 7.36 (m, 2H), 7.11 – 7.05 (m, 2H), 3.71 – 3.59 (m, 4H), 3.57 (t,  $J = 4.9$  Hz, 2H), 3.44 – 3.32 (m, 2H), 2.94 (t,  $J = 7.7$  Hz, 2H), 2.58 (t,  $J = 7.7$  Hz, 2H).

$^{13}\text{C NMR}$  (126 MHz,  $\text{CDCl}_3$ )  $\delta$ : 170.56, 140.25, 131.71, 130.39, 120.14, 67.02, 66.64, 46.03, 42.11, 34.67, 30.81.

IR:  $\nu$  2973, 2920, 2850, 1632.

HRMS (ESI-TOF)  $m/z$ :  $[\text{M}+\text{H}^+]$  calculated for  $\text{C}_{13}\text{H}_{17}\text{NOBr}$ , 298.0443; found, 298.0455.

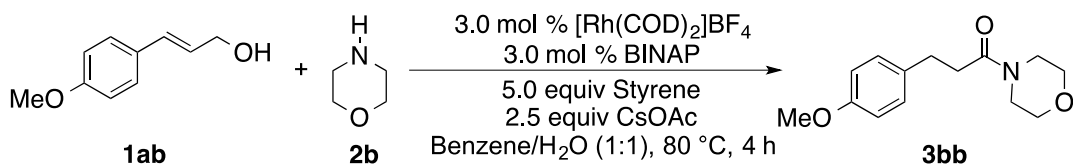

**3-(4-methoxyphenyl)-1-morpholinopropan-1-one (Table 2, 3bb):**  $[\text{Rh}(\text{COD})_2]\text{BF}_4$  (3.1 mg, 0.0075 mmol, 3.0 mol %), BINAP (4.7 mg, 0.0075 mmol, 3.0 mol %), and CsOAc (120 mg, 1.25 mmol, 2.5 equiv) were added to a 4 mL vial equipped with a stir bar. After purging with nitrogen, to the vial was added sequentially benzene (0.2 mL), morpholine (65  $\mu\text{L}$ , 0.75 mmol, 3.0 equiv), styrene (145  $\mu\text{L}$ , 1.25 mmol, 5.0 equiv), (*E*)-3-(4-methoxyphenyl)prop-2-en-1-ol (41 mg, 0.25 mmol, 1.0 equiv) and DI water (0.2 mL). The resulting solution was allowed to stir for 4 h at 80  $^\circ\text{C}$ . Then, the reaction vial was cooled to room temperature followed by the addition of diphenylmethane as an internal standard for analysis of the crude reaction mixture. The biphasic solution was added EtOAc, dried over anhydrous  $\text{MgSO}_4$ , and filtered. The solution was concentrated *in vacuo* and then purified by silica gel chromatography (2:1 hexanes/EtOAc) to afford a colorless liquid in 72% yield.

$R_f = 0.1$

**<sup>1</sup>H NMR** (400 MHz, CDCl<sub>3</sub>) δ: 7.18 – 7.08 (m, 2H), 6.89 – 6.76 (m, 2H), 3.78 (s, 3H), 3.74 – 3.56 (m, 4H), 3.67 – 3.46 (m, 2H), 3.42 – 3.30 (m, 2H), 2.91 (t, J = 7.7 Hz, 2H), 2.58 (t, J = 7.8 Hz, 2H).

**<sup>13</sup>C NMR** (101 MHz, CDCl<sub>3</sub>) δ: 171.08, 158.18, 133.19, 129.51, 114.03, 66.99, 66.62, 55.14, 46.09, 42.03, 35.20, 30.71.

**IR:** ν 2963, 2929, 2860, 1639, 1512.

**HRMS** (ESI-TOF) *m/z*: [M+H<sup>+</sup>] calculated for C<sub>14</sub>H<sub>20</sub>NO<sub>3</sub>, 250.1443; found, 250.1455.

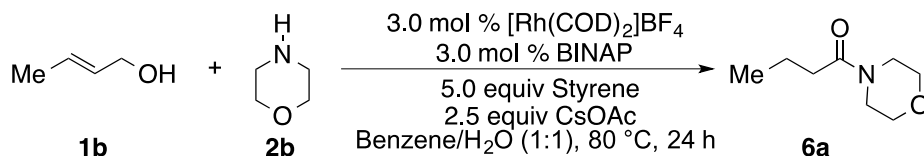

**1-morpholinobutan-1-one (Table 2, 6a):** [Rh(COD)<sub>2</sub>]BF<sub>4</sub> (3.1 mg, 0.0075 mmol, 3.0 mol %), BINAP (4.7 mg, 0.0075 mmol, 3.0 mol %), and CsOAc (120 mg, 1.25 mmol, 2.5 equiv) were added to a 4 mL vial equipped with a stir bar. After purging with nitrogen, to the vial was added sequentially benzene (0.2 mL), morpholine (65 μL, 0.75 mmol, 3.0 equiv), styrene (145 μL, 1.25 mmol, 5.0 equiv), crotyl alcohol (22 μL, 0.25 mmol, 1.0 equiv) and DI water (0.2 mL). The resulting solution was allowed to stir for 24 h at 80 °C. Then, the reaction vial was cooled to room temperature followed by the addition of diphenylmethane as an internal standard for analysis of the crude reaction mixture. The biphasic solution was added EtOAc, dried over anhydrous MgSO<sub>4</sub>, and filtered. The solution was concentrated *in vacuo* and then purified by silica gel chromatography (1:1 hexanes/EtOAc) to afford a light yellow liquid in 77% yield.

**R<sub>f</sub>** = 0.2

**<sup>1</sup>H NMR** (500 MHz, CDCl<sub>3</sub>) δ: 3.66 (dd, J = 5.7, 3.9 Hz, 4H), 3.63 – 3.43 (m, 4H), 2.29 (t, J = 7.6 Hz, 2H), 1.66 (h, J = 7.4 Hz, 2H), 0.97 (t, J = 7.4 Hz, 3H).

**<sup>13</sup>C NMR** (126 MHz, CDCl<sub>3</sub>) δ: 171.82, 67.05, 66.84, 46.15, 41.96, 35.15, 18.79, 14.11.

**IR:** ν 2965, 2934, 2861, 1642, 1433.

**HRMS** (ESI-TOF) *m/z*: [M+H<sup>+</sup>] calculated for C<sub>8</sub>H<sub>16</sub>NO<sub>2</sub>, 158.1181; found, 158.1180.

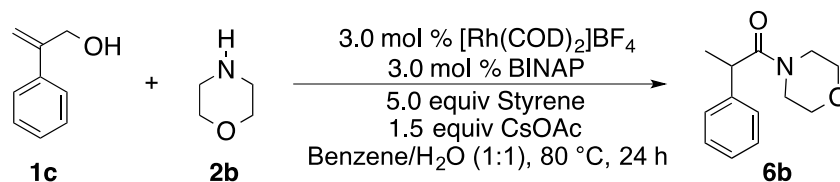

**1-morpholino-2-phenylpropan-1-one (Table 2, 6b):** [Rh(COD)<sub>2</sub>]BF<sub>4</sub> (3.1 mg, 0.0075 mmol, 3.0 mol %), BINAP (4.7 mg, 0.0075 mmol, 3.0 mol %), and CsOAc (72 mg, 0.38 mmol, 1.5 equiv) were added to a 4 mL vial equipped with a stir bar. After purging with nitrogen, to the vial was added sequentially benzene (0.2 mL), morpholine (65 μL, 0.75 mmol, 3.0 equiv), styrene (145 μL, 1.25 mmol, 5.0 equiv), 2-phenylprop-2-en-1-ol (32 μL, 0.25 mmol, 1.0 equiv) and DI water (0.2 mL). The resulting solution was allowed to stir for 24 h at 80 °C. Then, the reaction vial was cooled to room temperature followed by the addition of diphenylmethane as an internal standard for analysis of the crude reaction mixture. The biphasic solution was added EtOAc, dried over anhydrous MgSO<sub>4</sub>, and filtered. The solution was concentrated *in vacuo* and then purified by silica gel chromatography (1:1 hexanes/EtOAc) to afford a light yellow liquid in 61% yield.

Wu, Z.; Hull, K. L.

$R_f = 0.2$

**$^1\text{H}$  NMR** (400 MHz,  $\text{CDCl}_3$ )  $\delta$ : 7.35 – 7.28 (m, 2H), 7.26 – 7.20 (m, 3H), 3.83 (q,  $J = 6.9$  Hz, 1H), 3.78 (dd,  $J = 9.4, 3.6$  Hz, 1H), 3.66 (dd,  $J = 9.4, 4.6$  Hz, 1H), 3.57 – 3.43 (m, 3H), 3.39 (ddd,  $J = 13.5, 7.4, 3.2$  Hz, 1H), 3.29 (ddd,  $J = 13.9, 6.1, 3.4$  Hz, 1H), 3.09 (ddd,  $J = 10.8, 7.3, 3.1$  Hz, 1H), 1.45 (d,  $J = 6.8$  Hz, 3H).

**$^{13}\text{C}$  NMR** (101 MHz,  $\text{CDCl}_3$ )  $\delta$ : 172.28, 141.93, 129.12, 127.25, 127.01, 66.90, 66.40, 46.11, 43.37, 42.48, 20.76.

**IR**:  $\nu$  2974, 2932, 2858, 1642, 1430.

**HRMS** (ESI-TOF)  $m/z$ :  $[\text{M}+\text{H}^+]$  calculated for  $\text{C}_{13}\text{H}_{18}\text{NO}_2$ , 220.1338; found, 220.1340.

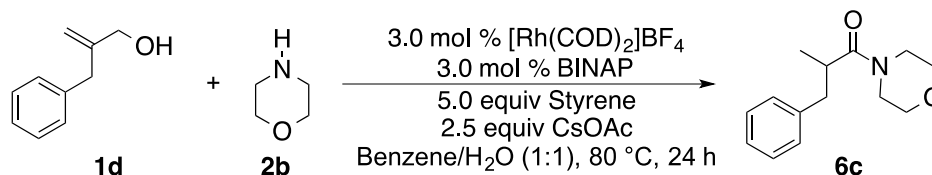

**2-methyl-1-morpholino-3-phenylpropan-1-one (Table 2, 6c)**:  $[\text{Rh}(\text{COD})_2]\text{BF}_4$  (3.1 mg, 0.0075 mmol, 3.0 mol %), BINAP (4.7 mg, 0.0075 mmol, 3.0 mol %), and CsOAc (120 mg, 1.25 mmol, 2.5 equiv) were added to a 4 mL vial equipped with a stir bar. After purging with nitrogen, to the vial was added sequentially benzene (0.2 mL), morpholine (65  $\mu\text{L}$ , 0.75 mmol, 3.0 equiv), styrene (145  $\mu\text{L}$ , 1.25 mmol, 5.0 equiv), 2-benzylprop-2-en-1-ol (37  $\mu\text{L}$ , 0.25 mmol, 1.0 equiv) and DI water (0.2 mL). The resulting solution was allowed to stir for 24 h at 80 °C. Then, the reaction vial was cooled to room temperature followed by the addition of diphenylmethane as an internal standard for analysis of the crude reaction mixture. The biphasic solution was added EtOAc, dried over anhydrous  $\text{MgSO}_4$ , and filtered. The solution was concentrated *in vacuo* and then purified by silica gel chromatography (1:1 hexanes/ EtOAc) to afford a light yellow liquid in 61% yield.

$R_f = 0.35$

**$^1\text{H}$  NMR** (500 MHz,  $\text{CDCl}_3$ )  $\delta$ : 7.32 – 7.26 (m, 2H), 7.24 – 7.13 (m, 3H), 3.74 – 3.54 (m, 2H), 3.52 – 3.38 (m, 3H), 3.30 (ddd,  $J = 13.5, 7.5, 3.2$  Hz, 1H), 3.15 (ddd,  $J = 13.4, 5.9, 3.0$  Hz, 1H), 3.01 (ddd,  $J = 11.9, 7.9, 3.6$  Hz, 1H), 2.98 – 2.93 (m, 2H), 2.78 – 2.62 (m, 1H), 1.18 (d,  $J = 6.0$  Hz, 3H).

**$^{13}\text{C}$  NMR** (126 MHz,  $\text{CDCl}_3$ )  $\delta$ : 174.55, 140.02, 129.18, 128.55, 126.53, 66.94, 66.52, 46.11, 42.19, 40.94, 37.43, 18.15.

**IR**:  $\nu$  2971, 2929, 2859, 1636, 1433.

**HRMS** (ESI-TOF)  $m/z$ :  $[\text{M}+\text{H}^+]$  calculated for  $\text{C}_{14}\text{H}_{20}\text{NO}_2$ , 234.1494; found, 234.1493.

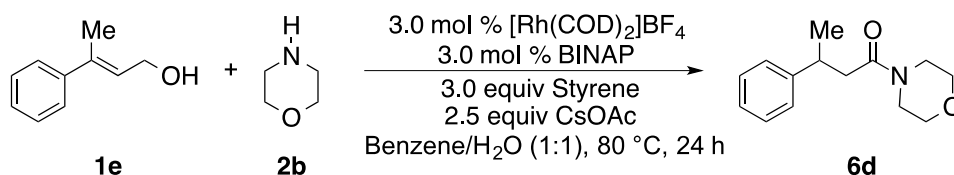

**1-morpholino-3-phenylbutan-1-one (Table 2, 6d)**:  $[\text{Rh}(\text{COD})_2]\text{BF}_4$  (3.1 mg, 0.0075 mmol, 3.0 mol %), BINAP (4.7 mg, 0.0075 mmol, 3.0 mol %), and CsOAc (120 mg, 1.25 mmol, 2.5 equiv) were added to a 4 mL vial equipped with a stir bar. After purging with nitrogen, to the vial was added sequentially benzene (0.2 mL), morpholine (65  $\mu\text{L}$ , 0.75 mmol, 3.0 equiv), styrene (87  $\mu\text{L}$ , 0.75 mmol, 3.0 equiv), (*E*)-3-phenylbut-2-en-1-ol (38  $\mu\text{L}$ , 0.25 mmol, 1.0 equiv) and DI water (0.2

mL). The resulting solution was allowed to stir for 24 h at 80 °C. Then, the reaction vial was cooled to room temperature followed by the addition of diphenylmethane as an internal standard for analysis of the crude reaction mixture. The biphasic solution was added EtOAc, dried over anhydrous MgSO<sub>4</sub>, and filtered. The solution was concentrated *in vacuo* and then purified by silica gel chromatography (1:1 hexanes/ EtOAc) to afford a colorless liquid in 84% yield.

**R<sub>f</sub>** = 0.15

**<sup>1</sup>H NMR** (500 MHz, CDCl<sub>3</sub>) δ: 7.32 – 7.27 (m, 2H), 7.25 – 7.18 (m, 3H), 3.71 – 3.58 (m, 2H), 3.56 – 3.42 (m, 3H), 3.39 – 3.28 (m, 2H), 3.28 – 3.16 (m, 2H), 2.62 (dd, *J* = 14.5, 7.0 Hz, 1H), 2.50 (dd, *J* = 14.5, 7.4 Hz, 1H), 1.35 (d, *J* = 7.0 Hz, 3H).

**<sup>13</sup>C NMR** (126 MHz, CDCl<sub>3</sub>) δ: 170.55, 146.14, 128.67, 127.04, 126.62, 66.96, 66.55, 46.33, 42.02, 41.54, 37.06, 21.77.

**IR:** ν 2966, 2926, 2860, 1638, 1455, 1429.

**HRMS** (ESI-TOF) *m/z*: [M+H<sup>+</sup>] calculated for C<sub>14</sub>H<sub>20</sub>NO<sub>2</sub>, 234.1494; found, 234.1499.

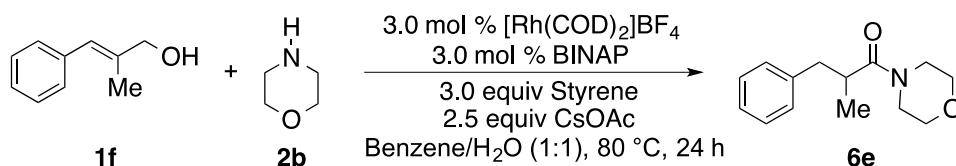

**2-methyl-1-morpholino-3-phenylpropan-1-one (Table 2, 6e):** [Rh(COD)<sub>2</sub>]<sub>2</sub>BF<sub>4</sub> (3.1 mg, 0.0075 mmol, 3.0 mol %), BINAP (4.7 mg, 0.0075 mmol, 3.0 mol %), and CsOAc (120 mg, 1.25 mmol, 2.5 equiv) were added to a 4 mL vial equipped with a stir bar. After purging with nitrogen, to the vial was added sequentially benzene (0.2 mL), morpholine (65 μL, 0.75 mmol, 3.0 equiv), styrene (87 μL, 0.75 mmol, 3.0 equiv), (*E*)-2-methyl-3-phenylprop-2-en-1-ol (36 μL, 0.25 mmol, 1.0 equiv) and DI water (0.2 mL). The resulting solution was allowed to stir for 24 h at 80 °C. Then, the reaction vial was cooled to room temperature followed by the addition of diphenylmethane as an internal standard for analysis of the crude reaction mixture. The biphasic solution was added EtOAc, dried over anhydrous MgSO<sub>4</sub>, and filtered. The solution was concentrated *in vacuo* and then purified by silica gel chromatography (1:1 hexanes/ EtOAc) to afford a colorless liquid in 52% yield.

**R<sub>f</sub>** = 0.1

**<sup>1</sup>H NMR** (400 MHz, CDCl<sub>3</sub>) δ: 7.32 – 7.25 (m, 2H), 7.24 – 7.14 (m, 3H), 3.74 – 3.55 (m, 2H), 3.51 – 3.38 (m, 3H), 3.35 – 3.25 (m, 1H), 3.21 – 3.10 (m, 1H), 3.07 – 2.86 (m, 3H), 2.76 – 2.65 (m, 1H), 1.18 (d, *J* = 6.0 Hz, 3H).

**<sup>13</sup>C NMR** (126 MHz, CDCl<sub>3</sub>) δ: 174.55, 139.99, 129.16, 128.53, 126.52, 66.92, 66.50, 46.10, 42.17, 40.93, 37.41, 18.14.

**IR:** ν 2972, 2928, 2859, 1635, 1434.

**HRMS** (ESI-TOF) *m/z*: [M+H<sup>+</sup>] calculated for C<sub>14</sub>H<sub>20</sub>NO<sub>2</sub>, 234.1494; found, 234.1496.

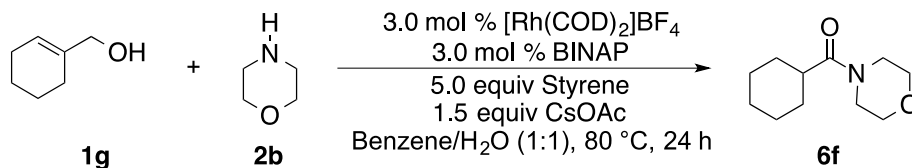

**cyclohexyl(morpholino)methanone (Table 2, 6f):** [Rh(COD)<sub>2</sub>]<sub>2</sub>BF<sub>4</sub> (3.1 mg, 0.0075 mmol, 3.0 mol %), BINAP (4.7 mg, 0.0075 mmol, 3.0 mol %), and CsOAc (72 mg, 0.38 mmol, 1.5 equiv) were added to a 4 mL vial equipped with a stir bar.

After purging with with nitrogen, to the vial was added sequentially benzene (0.2 mL), morpholine (65  $\mu$ L, 0.75 mmol, 3.0 equiv), styrene (145  $\mu$ L, 1.25 mmol, 5.0 equiv), cyclohex-1-en-1-ylmethanol (29  $\mu$ L, 0.25 mmol, 1.0 equiv) and DI water (0.2 mL). The resulting solution was allowed to stir for 24 h at 80  $^{\circ}$ C. Then, the reaction vial was cooled to room temperature followed by the addition of diphenylmethane as an internal standard for analysis of the crude reaction mixture. The biphasic solution was added EtOAc, dried over anhydrous  $\text{MgSO}_4$ , and filtered. The solution was concentrated *in vacuo* and then purified by silica gel chromatography (1:1 hexanes/EtOAc) to afford a white solid in 54% yield.

$R_f = 0.2$

mp = 54-55  $^{\circ}$ C

$^1\text{H}$  NMR (400 MHz,  $\text{CDCl}_3$ )  $\delta$ : 3.73 – 3.63 (m, 4H), 3.64 – 3.41 (m, 4H), 2.43 (tt,  $J = 11.6, 3.4$  Hz, 1H), 1.91 – 1.76 (m, 2H), 1.76 – 1.60 (m, 3H), 1.60 – 1.46 (m, 2H), 1.33 – 1.21 (m, 3H).

$^{13}\text{C}$  NMR (101 MHz,  $\text{CDCl}_3$ )  $\delta$ : 174.90, 67.16, 67.03, 46.04, 42.06, 40.40, 29.45, 25.96, 25.93.

IR:  $\nu$  2923, 2852, 1642, 1454, 1452.

HRMS (ESI-TOF)  $m/z$ :  $[\text{M}+\text{H}^+]$  calculated for  $\text{C}_{11}\text{H}_{20}\text{NO}_2$ , 198.1494; found, 198.1495.

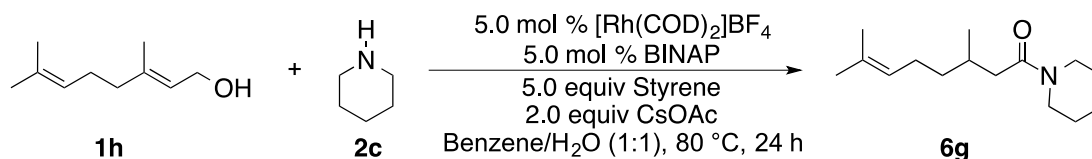

**3,7-dimethyl-1-(piperidin-1-yl)oct-6-en-1-one (Table 2, 6g):**  $[\text{Rh}(\text{COD})_2]\text{BF}_4$  (5.0 mg, 0.0125 mmol, 5.0 mol %) and BINAP (7.8 mg, 0.0125 mmol, 5.0 mol %), and CsOAc (96 mg, 0.50 mmol, 2.0 equiv) were added to a 4 mL vial equipped with a stir bar. After purging with with nitrogen, to the vial was added sequentially benzene (0.2 mL), piperidine (74  $\mu$ L, 0.75 mmol, 3.0 equiv), styrene (145  $\mu$ L, 1.25 mmol, 5.0 equiv), geraniol (44  $\mu$ L, 0.25 mmol, 1.0 equiv) and DI water (0.2 mL). The resulting solution was allowed to stir for 24 h at 80  $^{\circ}$ C. Then, the reaction vial was cooled to room temperature followed by the addition of diphenylmethane as an internal standard for analysis of the crude reaction mixture. The biphasic solution was added EtOAc, dried over anhydrous  $\text{MgSO}_4$ , and filtered. The solution was concentrated *in vacuo* and then purified by silica gel chromatography (3:1 hexanes/EtOAc) to afford a light yellow liquid in 64% yield.

$R_f = 0.35$

$^1\text{H}$  NMR (400 MHz,  $\text{CDCl}_3$ )  $\delta$ : 5.23 – 4.88 (m, 1H), 3.61 – 3.47 (m, 2H), 3.45 – 3.31 (m, 2H), 2.32 (dd,  $J = 14.3, 5.9$  Hz, 1H), 2.12 (dd,  $J = 14.3, 8.4$  Hz, 1H), 2.08 – 1.90 (m, 3H), 1.67 (d,  $J = 1.3$  Hz, 3H), 1.65 – 1.61 (m, 1H), 1.60 (d,  $J = 1.3$  Hz, 3H), 1.57 – 1.48 (m, 4H), 1.38 (dddd,  $J = 13.4, 9.3, 6.5, 5.4$  Hz, 1H), 1.21 (dddd,  $J = 13.6, 9.3, 7.9, 5.8$  Hz, 1H), 0.94 (d,  $J = 6.5$  Hz, 3H).

$^{13}\text{C}$  NMR (101 MHz,  $\text{CDCl}_3$ )  $\delta$ : 171.07, 131.51, 124.65, 47.09, 42.79, 40.85, 37.27, 30.26, 29.83, 26.76, 25.83, 25.66, 24.75, 19.95, 17.82.

IR:  $\nu$  2929, 2856, 1642, 1443.

HRMS (ESI-TOF)  $m/z$ :  $[\text{M}+\text{H}^+]$  calculated for  $\text{C}_{15}\text{H}_{28}\text{NO}$ , 238.2171; found, 238.2179.

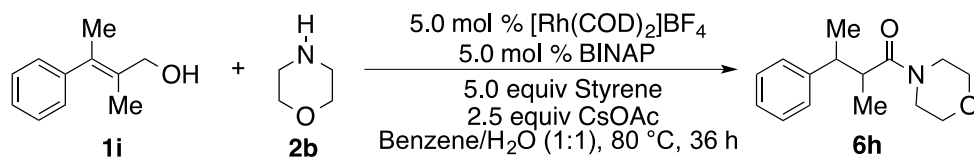

**2-methyl-1-morpholino-3-phenylbutan-1-one (Table 2, 6h):**  $[\text{Rh}(\text{COD})_2]\text{BF}_4$  (5.0 mg, 0.0125 mmol, 5.0 mol %) and BINAP (7.8 mg, 0.0125 mmol, 5.0 mol %), and CsOAc (120 mg, 0.50 mmol, 2.5 equiv) were added to a 4 mL vial equipped with a stir bar. After purging with nitrogen, to the vial was added sequentially benzene (0.2 mL), morpholine (65  $\mu\text{L}$ , 0.75 mmol, 3.0 equiv), styrene (145  $\mu\text{L}$ , 1.25 mmol, 5.0 equiv), (*E*)-2-methyl-3-phenylbut-2-en-1-ol (**1i**, 42  $\mu\text{L}$ , 0.25 mmol, 1.0 equiv) and DI water (0.2 mL). The resulting solution was allowed to stir for 36 h at 80 °C. Then, the reaction vial was cooled to room temperature followed by the addition of diphenylmethane as an internal standard for analysis of the crude reaction mixture. The biphasic solution was added EtOAc, dried over anhydrous  $\text{MgSO}_4$ , and filtered. The solution was concentrated *in vacuo* and then purified by silica gel chromatography (1:1 hexanes/EtOAc) to afford two diastereomers in 31% (d. r. = 1.6).

$R_f = 0.2$

**$^1\text{H}$  NMR** (500 MHz,  $\text{CDCl}_3$ )  $\delta$  **major diastereomer:** 7.30 – 7.23 (m, 2H), 7.22 – 7.16 (m, 3H), 3.64 – 3.48 (m, 2H), 3.45 – 3.35 (m, 1H), 3.28 – 3.13 (m, 3H), 3.10 – 2.97 (m, 2H), 2.85 – 2.76 (m, 1H), 2.76 – 2.70 (m, 1H), 1.32 (d,  $J = 7.1$  Hz, 2H), 1.21 (d,  $J = 6.6$  Hz, 2H); **minor diastereomer:** 7.34 – 7.28 (m, 2H), 7.25 – 7.17 (m, 3H), 3.72 – 3.67 (m, 4H), 3.66 – 3.61 (m, 2H), 3.59 – 3.51 (m, 2H), 3.04 (dq,  $J = 9.8, 6.8$  Hz, 1H), 2.84 (dq,  $J = 9.7, 6.7$  Hz, 1H), 1.22 (d,  $J = 6.9$  Hz, 3H), 0.89 (d,  $J = 6.7$  Hz, 3H).

**$^{13}\text{C}$  NMR** (126 MHz,  $\text{CDCl}_3$ )  $\delta$  **major diastereomer:** 174.67, 145.80, 128.48, 127.52, 126.65, 66.85, 66.42, 46.12, 43.01, 42.55, 41.97, 18.06, 16.13; **minor diastereomer:** 174.85, 145.09, 128.61, 127.82, 126.58, 67.25, 66.97, 46.43, 43.74, 42.33, 41.86, 20.57, 17.25.

**IR:**  $\nu$  2967, 2929, 2680, 1621.

**HRMS** (ESI-TOF)  $m/z$ :  $[\text{M}+\text{H}^+]$  calculated for  $\text{C}_{15}\text{H}_{22}\text{NO}_2$ , 248.1651; found, 248.1657.

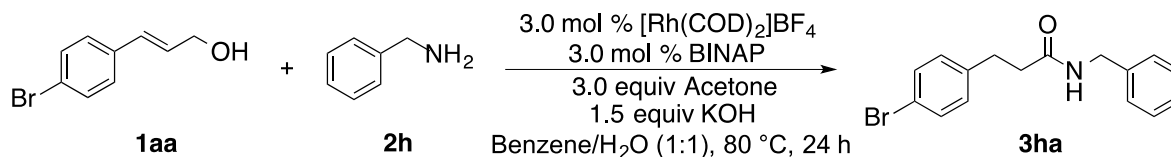

***N*-benzyl-3-(4-bromophenyl)propanamide (Table 2, 3ha):**  $[\text{Rh}(\text{COD})_2]\text{BF}_4$  (3.1 mg, 0.0075 mmol, 3.0 mol %), BINAP (4.7 mg, 0.0075 mmol, 3.0 mol %), and KOH (21 mg, 0.38 mmol, 1.5 equiv) were added to a 4 mL vial equipped with a stir bar. After purging with nitrogen, to the vial was added sequentially benzene (0.2 mL), benzylamine (82  $\mu\text{L}$ , 0.75 mmol, 3.0 equiv), acetone (54  $\mu\text{L}$ , 0.75 mmol, 3.0 equiv), (*E*)-3-(4-bromophenyl)prop-2-en-1-ol (53 mg, 0.25 mmol, 1.0 equiv) and DI water (0.2 mL). The resulting solution was allowed to stir for 24 h at 80 °C. Then, the reaction vial was cooled to room temperature followed by the addition of diphenylmethane as an internal standard for analysis of the crude reaction mixture. The biphasic solution was added EtOAc, dried over anhydrous  $\text{MgSO}_4$ , and filtered. The solution was concentrated *in vacuo* and then purified by silica gel chromatography (2:1 hexanes/EtOAc) to afford a white solid in 60 % yield.



$R_f = 0.1$

mp = 136-139 °C (reported mp = 140-141 °C)<sup>1</sup>

<sup>1</sup>H NMR (500 MHz, CDCl<sub>3</sub>) δ: 7.43 – 7.36 (m, 2H), 7.34 – 7.26 (m, 3H), 7.15 – 7.11 (m, 2H), 7.10 – 7.04 (m, 2H), 5.59 (bs, 1H), 4.39 (d, J = 5.7 Hz, 2H), 2.95 (t, J = 7.5 Hz, 2H), 2.48 (t, J = 7.4 Hz, 2H).

<sup>13</sup>C NMR (126 MHz, CDCl<sub>3</sub>) δ: 171.49, 139.86, 138.14, 131.73, 130.37, 128.84, 127.86, 127.69, 120.20, 43.73, 38.41, 31.18.

IR: ν 3296, 3035, 2934, 1635, 1539.

HRMS (ESI-TOF) *m/z*: [M+H<sup>+</sup>] calculated for C<sub>16</sub>H<sub>17</sub>NOBr, 318.0494; found, 318.0491.

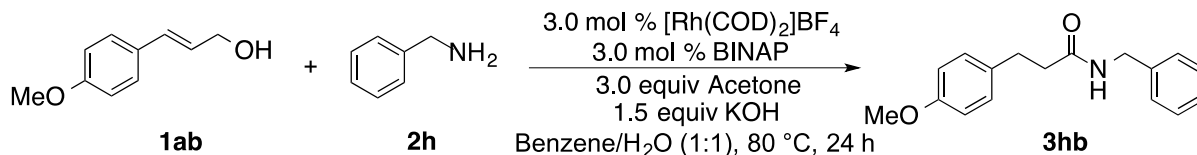

**N-benzyl-3-(4-methoxyphenyl)propanamide (Table 2, 3hb):** [Rh(COD)<sub>2</sub>]BF<sub>4</sub> (3.1 mg, 0.0075 mmol, 3.0 mol %), BINAP (4.7 mg, 0.0075 mmol, 3.0 mol %), and KOH (21 mg, 0.38 mmol, 1.5 equiv) were added to a 4 mL vial equipped with a stir bar. After purging with nitrogen, to the vial was added sequentially benzene (0.2 mL), benzylamine (82 μL, 0.75 mmol, 3.0 equiv), acetone (54 μL, 0.75 mmol, 3.0 equiv), (*E*)-3-(4-methoxyphenyl)prop-2-en-1-ol (41 mg, 0.25 mmol, 1.0 equiv) and DI water (0.2 mL). The resulting solution was allowed to stir for 24 h at 80 °C. Then, the reaction vial was cooled to room temperature followed by the addition of diphenylmethane as an internal standard for analysis of the crude reaction mixture. The biphasic solution was added EtOAc, dried over anhydrous MgSO<sub>4</sub>, and filtered. The solution was concentrated *in vacuo* and then purified by silica gel chromatography (2:1 hexanes/EtOAc) to afford a white solid in 70 % yield.

$R_f = 0.1$

mp = 91-92 °C (reported mp = 92 °C)<sup>17</sup>

<sup>1</sup>H NMR (500 MHz, CDCl<sub>3</sub>) δ: 7.35 – 7.24 (m, 3H), 7.19 – 7.04 (m, 4H), 6.87 – 6.72 (m, 2H), 5.58 (bs, 1H), 4.40 (d, J = 5.7 Hz, 2H), 3.79 (s, 3H), 2.94 (t, J = 7.5 Hz, 2H), 2.48 (t, J = 7.5 Hz, 2H).

<sup>13</sup>C NMR (126 MHz, CDCl<sub>3</sub>) δ: 172.05, 158.21, 138.29, 132.90, 129.50, 128.78, 127.89, 127.60, 114.08, 55.39, 43.69, 38.98, 31.01.

IR: ν 3292, 3067, 2938, 1635, 1512.

HRMS (ESI-TOF) *m/z*: [M+H<sup>+</sup>] calculated for C<sub>17</sub>H<sub>20</sub>NO<sub>2</sub>, 270.1494; found, 270.1501.

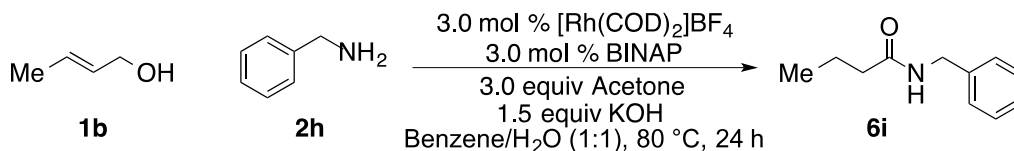

**N-benzylbutyramide (Table 2, 6i):** [Rh(COD)<sub>2</sub>]BF<sub>4</sub> (3.1 mg, 0.0075 mmol, 3.0 mol %), BINAP (4.7 mg, 0.0075 mmol, 3.0 mol %), and KOH (21 mg, 0.38 mmol, 1.5 equiv) were added to a 4 mL vial equipped with a stir bar. After purging with

with nitrogen, to the vial was added sequentially benzene (0.2 mL), benzylamine (82  $\mu$ L, 0.75 mmol, 3.0 equiv), acetone (54  $\mu$ L, 0.75 mmol, 3.0 equiv), crotyl alcohol (22  $\mu$ L, 0.25 mmol, 1.0 equiv) and DI water (0.2 mL). The resulting solution was allowed to stir for 24 h at 80  $^{\circ}$ C. Then, the reaction vial was cooled to room temperature followed by the addition of diphenylmethane as an internal standard for analysis of the crude reaction mixture. The biphasic solution was added EtOAc, dried over anhydrous  $\text{MgSO}_4$ , and filtered. The solution was concentrated *in vacuo* and then purified by silica gel chromatography (4:1 hexanes/EtOAc) to afford a white solid in 87% yield.

$R_f = 0.2$

mp = 48-50  $^{\circ}$ C (reported mp = 49-50  $^{\circ}$ C)<sup>11</sup>

$^1\text{H NMR}$  (400 MHz,  $\text{CDCl}_3$ )  $\delta$ : 7.54 – 7.09 (m, 5H), 5.76 (bs, 1H), 4.44 (d,  $J = 5.7$  Hz, 2H), 2.19 (t,  $J = 7.5$  Hz, 2H), 1.69 (h,  $J = 7.4$  Hz, 2H), 0.96 (t,  $J = 7.4$  Hz, 3H).

$^{13}\text{C NMR}$  (101 MHz,  $\text{CDCl}_3$ )  $\delta$ : 172.93, 138.53, 128.83, 127.95, 127.62, 43.70, 38.84, 19.32, 13.94.

IR:  $\nu$  3282, 2927, 2853, 1641, 1551.

HRMS (ESI-TOF)  $m/z$ :  $[\text{M}+\text{H}^+]$  calculated for  $\text{C}_{11}\text{H}_{16}\text{NO}$ , 178.1232; found, 178.1237.

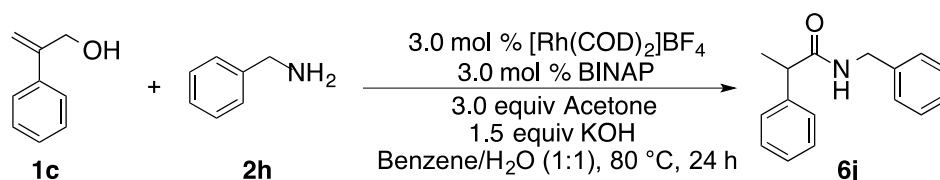

**N-benzyl-2-phenylpropanamide (Table 2, 6j):**  $[\text{Rh}(\text{COD})_2]\text{BF}_4$  (3.1 mg, 0.0075 mmol, 3.0 mol %), BINAP (4.7 mg, 0.0075 mmol, 3.0 mol %), and KOH (21 mg, 0.38 mmol, 1.5 equiv) were added to a 4 mL vial equipped with a stir bar. After purging with nitrogen, to the vial was added sequentially benzene (0.2 mL), benzylamine (82  $\mu$ L, 0.75 mmol, 3.0 equiv), acetone (54  $\mu$ L, 0.75 mmol, 3.0 equiv), 2-phenylprop-2-en-1-ol (32  $\mu$ L, 0.25 mmol, 1.0 equiv) and DI water (0.2 mL). The resulting solution was allowed to stir for 24 h at 80  $^{\circ}$ C. Then, the reaction vial was cooled to room temperature followed by the addition of diphenylmethane as an internal standard for analysis of the crude reaction mixture. The biphasic solution was added EtOAc, dried over anhydrous  $\text{MgSO}_4$ , and filtered. The solution was concentrated *in vacuo* and then purified by silica gel chromatography (4:1 hexanes/EtOAc) to afford an orange solid in 74% yield.

$R_f = 0.25$

mp = 74-75  $^{\circ}$ C (reported mp = 76  $^{\circ}$ C)<sup>12</sup>

$^1\text{H NMR}$  (400 MHz,  $\text{CDCl}_3$ )  $\delta$ : 7.39 – 7.20 (m, 8H), 7.18 – 7.11 (m, 2H), 5.60 (bs, 1H), 4.47 – 4.32 (m, 2H), 3.60 (q,  $J = 7.2$  Hz, 1H), 1.56 (d,  $J = 7.2$  Hz, 3H).

$^{13}\text{C NMR}$  (126 MHz,  $\text{CDCl}_3$ )  $\delta$ : 174.14, 141.40, 138.43, 129.10, 128.76, 127.81, 127.60, 127.50, 127.47, 47.34, 43.71, 18.70.

IR:  $\nu$  3308, 3033, 2970, 2926, 1637, 1538.

HRMS (ESI-TOF)  $m/z$ :  $[\text{M}+\text{H}^+]$  calculated for  $\text{C}_{16}\text{H}_{18}\text{NO}$ , 240.1388; found, 240.1396.

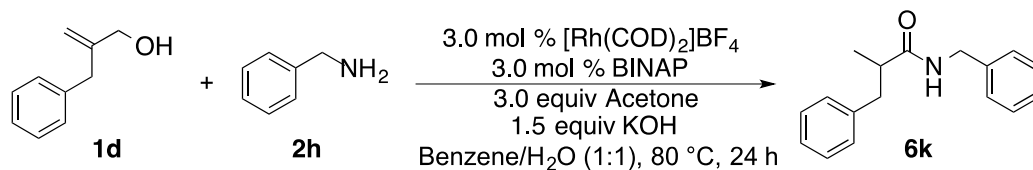

***N*-benzyl-2-methyl-3-phenylpropanamide (Table 2, 6k):** [Rh(COD)<sub>2</sub>]BF<sub>4</sub> (3.1 mg, 0.0075 mmol, 3.0 mol %), BINAP (4.7 mg, 0.0075 mmol, 3.0 mol %), and KOH (21 mg, 0.38 mmol, 1.5 equiv) were added to a 4 mL vial equipped with a stir bar. After purging with nitrogen, to the vial was added sequentially benzene (0.2 mL), benzylamine (82  $\mu$ L, 0.75 mmol, 3.0 equiv), acetone (54  $\mu$ L, 0.75 mmol, 3.0 equiv), 2-benzylprop-2-en-1-ol (37  $\mu$ L, 0.25 mmol, 1.0 equiv) and DI water (0.2 mL). The resulting solution was allowed to stir for 24 h at 80 °C. Then, the reaction vial was cooled to room temperature followed by the addition of diphenylmethane as an internal standard for analysis of the crude reaction mixture. The biphasic solution was added EtOAc, dried over anhydrous MgSO<sub>4</sub>, and filtered. The solution was concentrated *in vacuo* and then purified by silica gel chromatography (4:1 hexanes/EtOAc) to afford a white solid in 70% yield.

**R<sub>f</sub>** = 0.2

**mp** = 84-86 °C (reported mp = 83-84 °C)<sup>13</sup>

**<sup>1</sup>H NMR** (500 MHz, CDCl<sub>3</sub>)  $\delta$ : 7.35 – 7.12 (m, 8H), 7.10 – 6.95 (m, 2H), 5.44 (bs, 1H), 4.40 (dd, *J* = 14.8, 6.0 Hz, 1H), 4.28 (dd, *J* = 14.7, 5.4 Hz, 1H), 2.99 (dd, *J* = 13.4, 8.7 Hz, 1H), 2.71 (dd, *J* = 13.4, 6.2 Hz, 1H), 2.46 (dq, *J* = 8.8, 6.7 Hz, 1H), 1.23 (d, *J* = 6.8 Hz, 3H).

**<sup>13</sup>C NMR** (101 MHz, CDCl<sub>3</sub>)  $\delta$ : 175.41, 139.97, 138.26, 129.12, 128.72, 128.58, 127.79, 127.48, 126.42, 44.25, 43.51, 40.69, 18.04.

**IR:**  $\nu$  3283, 3030, 2960, 2930, 1637, 1550.

**HRMS** (ESI-TOF) *m/z*: [M+H<sup>+</sup>] calculated for C<sub>17</sub>H<sub>20</sub>NO, 254.1545; found, 254.1549.

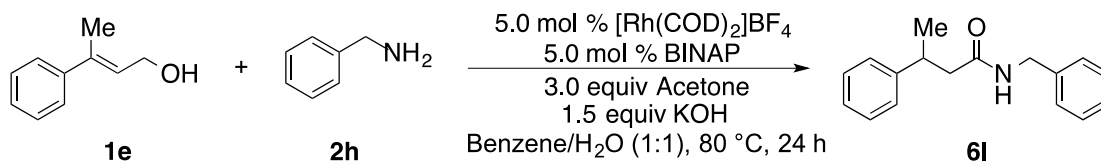

***N*-benzyl-3-phenylbutanamide (Table 2, 6l):** [Rh(COD)<sub>2</sub>]BF<sub>4</sub> (5.0 mg, 0.0125 mmol, 5.0 mol %) and BINAP (7.8 mg, 0.0125 mmol, 5.0 mol %), and KOH (21 mg, 0.38 mmol, 1.5 equiv) were added to a 4 mL vial equipped with a stir bar. After purging with nitrogen, to the vial was added sequentially benzene (0.2 mL), benzylamine (82  $\mu$ L, 0.75 mmol, 3.0 equiv), acetone (54  $\mu$ L, 0.75 mmol, 3.0 equiv), (*E*)-3-phenylbut-2-en-1-ol (38  $\mu$ L, 0.25 mmol, 1.0 equiv) and DI water (0.2 mL). The resulting solution was allowed to stir for 24 h at 80 °C. Then, the reaction vial was cooled to room temperature followed by the addition of diphenylmethane as an internal standard for analysis of the crude reaction mixture. The biphasic solution was added EtOAc, dried over anhydrous MgSO<sub>4</sub>, and filtered. The solution was concentrated *in vacuo* and then purified by silica gel chromatography (5:1 hexanes/EtOAc) to afford a colorless liquid in 74 % yield.

**R<sub>f</sub>** = 0.15

**<sup>1</sup>H NMR** (400 MHz, CDCl<sub>3</sub>) δ: 7.35 – 7.22 (m, 8H), 7.13 – 6.83 (m, 2H), 5.66 (bs, 1H), 4.40 (dd, J = 14.8, 6.0 Hz, 1H), 4.30 (dd, J = 14.8, 5.4 Hz, 1H), 3.36 (h, J = 7.2 Hz, 1H), 2.49 (d, J = 7.5 Hz, 2H), 1.35 (d, J = 7.0 Hz, 3H).

**<sup>13</sup>C NMR** (101 MHz, CDCl<sub>3</sub>) δ: 171.57, 145.84, 138.19, 128.74, 128.69, 127.68, 127.44, 126.95, 126.56, 45.97, 43.52, 37.21, 21.95.

**IR:** ν 3289, 3032, 2965, 2920, 1642, 1549.

**HRMS** (ESI-TOF) *m/z*: [M+H<sup>+</sup>] calculated for C<sub>17</sub>H<sub>20</sub>NO, 254.1545; found, 251.1546.

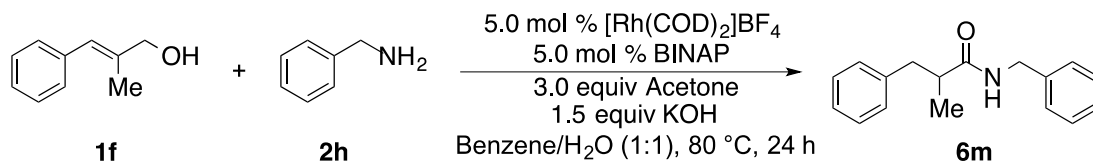

***N*-benzyl-2-methyl-3-phenylpropanamide (Table 2, 6m):** [Rh(COD)<sub>2</sub>]BF<sub>4</sub> (5.0 mg, 0.0125 mmol, 5.0 mol %) and BINAP (7.8 mg, 0.0125 mmol, 5.0 mol %), and KOH (21 mg, 0.38 mmol, 1.5 equiv) were added to a 4 mL vial equipped with a stir bar. After purging with nitrogen, to the vial was added sequentially benzene (0.2 mL), benzylamine (82 μL, 0.75 mmol, 3.0 equiv), acetone (54 μL, 0.75 mmol, 3.0 equiv), (*E*)-2-methyl-3-phenylprop-2-en-1-ol (36 μL, 0.25 mmol, 1.0 equiv) and DI water (0.2 mL). The resulting solution was allowed to stir for 24 h at 80 °C. Then, the reaction vial was cooled to room temperature followed by the addition of diphenylmethane as an internal standard for analysis of the crude reaction mixture. The biphasic solution was added EtOAc, dried over anhydrous MgSO<sub>4</sub>, and filtered. The solution was concentrated *in vacuo* and then purified by silica gel chromatography (4:1 hexanes/EtOAc) to afford a white solid in 60 % yield.

**R<sub>f</sub>** = 0.1

**mp** = 88-89 °C (reported mp = 83-84 °C)<sup>18</sup>

**<sup>1</sup>H NMR** (400 MHz, CDCl<sub>3</sub>) δ: 7.32 – 7.21 (m, 6H), 7.21 – 7.14 (m, 2H), 7.06 – 6.99 (m, 2H), 5.44 (bs, 1H), 4.40 (dd, J = 14.8, 6.0 Hz, 1H), 4.28 (dd, J = 14.7, 5.3 Hz, 1H), 2.99 (dd, J = 13.4, 8.8 Hz, 1H), 2.71 (dd, J = 13.4, 6.2 Hz, 1H), 2.46 (dp, J = 8.9, 6.7 Hz, 1H), 1.23 (d, J = 6.8 Hz, 3H).

**<sup>13</sup>C NMR** (101 MHz, CDCl<sub>3</sub>) δ: 175.43, 139.95, 138.25, 129.10, 128.69, 128.56, 127.76, 127.45, 126.39, 44.19, 43.47, 40.66, 18.02.

**IR:** ν 3284, 3030, 2960, 1637, 1549.

**HRMS** (ESI-TOF) *m/z*: [M+H<sup>+</sup>] calculated for C<sub>17</sub>H<sub>20</sub>NO, 254.1545; found, 251.1547.

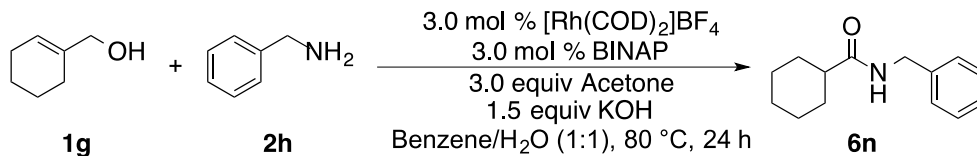

***N*-benzylcyclohexanecarboxamide (Table 2, 6n):** [Rh(COD)<sub>2</sub>]BF<sub>4</sub> (3.1 mg, 0.0075 mmol, 3.0 mol %), BINAP (4.7 mg, 0.0075 mmol, 3.0 mol %), and KOH (21 mg, 0.38 mmol, 1.5 equiv) were added to a 4 mL vial equipped with a stir bar. After purging with nitrogen, to the vial was added sequentially benzene (0.2 mL), benzylamine (82 μL, 0.75 mmol, 3.0 equiv), acetone (54 μL, 0.75 mmol, 3.0 equiv), cyclohex-1-en-1-ylmethanol (29 μL, 0.25 mmol, 1.0 equiv) and DI water Wu, Z.; Hull, K. L.

(0.2 mL). The resulting solution was allowed to stir for 24 h at 80 °C. Then, the reaction vial was cooled to room temperature followed by the addition of diphenylmethane as an internal standard for analysis of the crude reaction mixture. The biphasic solution was added EtOAc, dried over anhydrous MgSO<sub>4</sub>, and filtered. The solution was concentrated *in vacuo* and then purified by silica gel chromatography (4:1 hexanes/EtOAc) to afford a white solid in 67% yield.

 $\mathbf{R}_f = 0.4$ 

**mp** = 109-110 °C (reported mp = 107-109 °C)<sup>14</sup>

**<sup>1</sup>H NMR** (400 MHz, CDCl<sub>3</sub>) δ: 7.38 – 7.30 (m, 2H), 7.30 – 7.26 (m, 3H), 5.70 (bs, 1H), 4.44 (d, J = 5.6 Hz, 2H), 2.11 (tt, J = 11.8, 3.5 Hz, 1H), 1.94 – 1.85 (m, 2H), 1.83 – 1.76 (m, 2H), 1.71 – 1.63 (m, 1H), 1.47 (qd, J = 12.0, 3.3 Hz, 2H), 1.34 – 1.16 (m, 3H).

**<sup>13</sup>C NMR** (101 MHz, CDCl<sub>3</sub>) δ: 176.00, 138.66, 128.83, 127.87, 127.59, 45.73, 43.52, 29.87, 25.88 (overlap).

**IR:**  $\nu$  3285, 2927, 2853, 1641, 1550.

**HRMS** (ESI-TOF) *m/z*: [M+H<sup>+</sup>] calculated for C<sub>14</sub>H<sub>20</sub>NO, 218.1545; found, 218.1546.

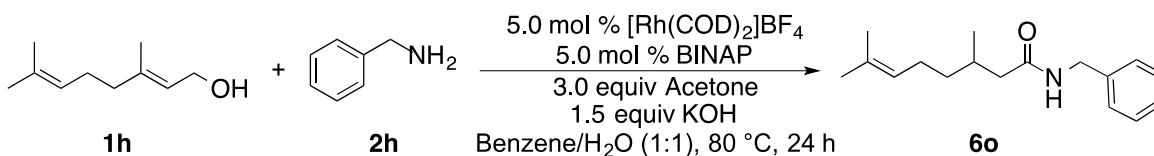

***N*-benzyl-3,7-dimethyloct-6-enamide (Table 2, 6o):** [Rh(COD)<sub>2</sub>]BF<sub>4</sub> (5.0 mg, 0.0125 mmol, 5.0 mol %) and BINAP (7.8 mg, 0.0125 mmol, 5.0 mol %), and KOH (21 mg, 0.38 mmol, 1.5 equiv) were added to a 4 mL vial equipped with a stir bar. After purging with with nitrogen, to the vial was added sequentially benzene (0.2 mL), benzylamine (82 μL, 0.75 mmol, 3.0 equiv), acetone (54 μL, 0.75 mmol, 3.0 equiv), genaniol (44 μL, 0.25 mmol, 1.0 equiv) and DI water (0.2 mL). The resulting solution was allowed to stir for 24 h at 80 °C. Then, the reaction vial was cooled to room temperature followed by the addition of diphenylmethane as an internal standard for analysis of the crude reaction mixture. The biphasic solution was added EtOAc, dried over anhydrous MgSO<sub>4</sub>, and filtered. The solution was concentrated *in vacuo* and then purified by silica gel chromatography (4:1 hexanes/EtOAc) to afford a white solid in 65 % yield.

$$\mathbf{R}_f = 0.2$$

**mp** = 39-42 °C (reported mp = 43-44 °C)<sup>15</sup>

**<sup>1</sup>H NMR** (400 MHz, CDCl<sub>3</sub>) δ: 7.38 – 7.31 (m, 2H), 7.30 – 7.26 (m, 3H), 5.68 (br, 1H), 5.27 – 4.85 (m, 1H), 4.53 – 4.36 (m, 2H), 2.27 – 2.21 (m, 1H), 2.10 – 1.91 (m, 4H), 1.67 (d, J = 1.2 Hz, 3H), 1.59 (d, J = 1.4 Hz, 3H), 1.43 – 1.33 (m, 1H), 1.24 – 1.15 (m, 1H), 0.95 (d, J = 6.2 Hz, 3H).

**<sup>13</sup>C NMR** (101 MHz, CDCl<sub>3</sub>) δ: 172.50, 138.54, 131.68, 128.85, 128.01, 127.65, 124.45, 44.69, 43.75, 37.05, 30.65, 25.86, 25.59, 19.72, 17.81.

**IR:**  $\nu$  3285, 2967, 2920, 2856, 1633, 1550.

**HRMS** (ESI-TOF)  $m/z$ :  $[M+H]^+$  calculated for  $C_{17}H_{26}NO$ , 260.2014; found, 260.2012.

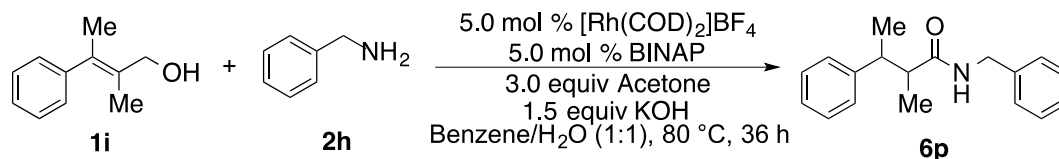

**N-benzyl-2-methyl-3-phenylbutanamide (Table 2, 6p):** [Rh(COD)<sub>2</sub>]<sub>2</sub>BF<sub>4</sub> (5.0 mg, 0.0125 mmol, 5.0 mol %) and BINAP (7.8 mg, 0.0125 mmol, 5.0 mol %), and KOH (21 mg, 0.38 mmol, 1.5 equiv) were added to a 4 mL vial equipped with a stir bar. After purging with with nitrogen, to the vial was added sequentially benzene (0.2 mL), benzylamine (82  $\mu$ L, 0.75 mmol, 3.0 equiv), acetone (54  $\mu$ L, 0.75 mmol, 3.0 equiv), (*E*)-2-methyl-3-phenylbut-2-en-1-ol (**1g**, 42  $\mu$ L, 0.25 mmol, 1.0 equiv) and DI water (0.2 mL). The resulting solution was allowed to stir for 36 h at 80 °C. Then, the reaction vial was cooled to room temperature followed by the addition of diphenylmethane as an internal standard for analysis of the crude reaction mixture. The biphasic solution was added EtOAc, dried over anhydrous MgSO<sub>4</sub>, and filtered. The solution was concentrated *in vacuo* and then purified by silica gel chromatography (6:1 hexanes/EtOAc) to afford afford two diastereomers in 41% (d. r. = 1).

**R<sub>f</sub>** = 0.1

**<sup>1</sup>H NMR** (500 MHz, CDCl<sub>3</sub>)  $\delta$  **diastereomer I**: 7.32 – 7.27 (m, 3H), 7.25 – 7.16 (m, 5H), 6.85 – 6.72 (m, 2H), 5.22 (bs, 1H), 4.26 (dd, *J* = 14.8, 6.3 Hz, 1H), 4.09 (dd, *J* = 14.8, 5.0 Hz, 1H), 3.02 (dq, *J* = 9.8, 7.1 Hz, 1H), 2.30 (dq, *J* = 9.8, 6.8 Hz, 1H), 1.30 (d, *J* = 7.1 Hz, 3H), 1.27 (d, *J* = 6.8 Hz, 3H); **diastereomer II**: 7.39 – 7.32 (m, 2H), 7.31 – 7.26 (m, 5H), 7.24 – 7.14 (m, 3H), 5.78 – 5.62 (m, 1H), 4.56 – 4.36 (m, 2H), 2.97 (dq, *J* = 9.9, 6.8 Hz, 1H), 2.30 (dq, *J* = 9.8, 6.8 Hz, 1H), 1.27 (d, *J* = 6.9 Hz, 3H), 0.97 (d, *J* = 6.8 Hz, 3H).

**<sup>13</sup>C NMR** (126 MHz, CDCl<sub>3</sub>)  $\delta$  **diastereomer I**: 175.32, 145.92, 138.19, 128.66, 128.62, 127.67, 127.47, 127.32, 126.51, 49.72, 43.35, 43.14, 18.66, 15.79; **diastereomer II**: 175.67, 144.91, 138.49, 128.88, 128.59, 128.05, 127.72, 127.69, 126.54, 49.09, 43.73, 43.58, 20.47, 17.07.

**IR**:  $\nu$  3279, 2968, 2932, 2878, 1645.

**HRMS** (ESI-TOF) *m/z*: [M+H<sup>+</sup>] calculated for C<sub>18</sub>H<sub>22</sub>NO, 268.1701; found, 268.1706.

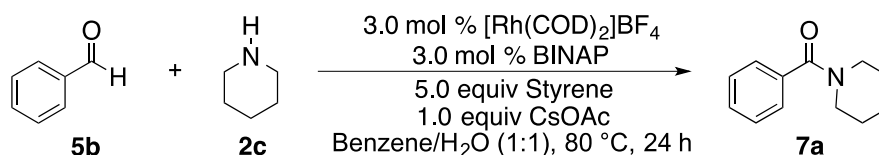

**phenyl(piperidin-1-yl)methanone (Table 3, 7a):** [Rh(COD)<sub>2</sub>]<sub>2</sub>BF<sub>4</sub> (3.1 mg, 0.0075 mmol, 3.0 mol %), BINAP (4.7 mg, 0.0075 mmol, 3.0 mol %), and CsOAc (48 mg, 0.25 mmol, 1.0 equiv) were added to a 4 mL vial equipped with a stir bar. After purging with with nitrogen, to the vial was added sequentially benzene (0.2 mL), piperidine (74  $\mu$ L  $\mu$ L, 0.75 mmol, 3.0 equiv), styrene (145  $\mu$ L, 1.25 mmol, 5.0 equiv), benzaldehyde (26  $\mu$ L, 0.25 mmol, 1.0 equiv) and DI water (0.2 mL). The resulting solution was allowed to stir for 24 h at 80 °C. Then, the reaction vial was cooled to room temperature followed by the addition of diphenylmethane as an internal standard for analysis of the crude reaction mixture. The biphasic solution was added EtOAc, dried over anhydrous MgSO<sub>4</sub>, and filtered. The solution was concentrated *in vacuo* and then purified by silica gel chromatography (2:1 hexanes/EtOAc) to afford a colorless liquid in 91% yield.

$R_f = 0.4$

$^1\text{H NMR}$  (400 MHz,  $\text{CDCl}_3$ )  $\delta$ : 7.39 (m, 5H), 3.81 – 3.60 (m, 2H), 3.42 – 3.24 (m, 2H), 1.82 – 1.40 (m, 6H).

$^{13}\text{C NMR}$  (101 MHz,  $\text{CDCl}_3$ )  $\delta$ : 170.43, 136.60, 129.45, 128.51, 126.89, 48.86, 43.22, 26.65, 25.73, 24.71.

IR:  $\nu$  2938, 2857, 1627, 1431.

HRMS (ESI-TOF)  $m/z$ :  $[\text{M}+\text{H}^+]$  calculated for  $\text{C}_{12}\text{H}_{16}\text{NO}$ , 190.1232; found, 190.1236.

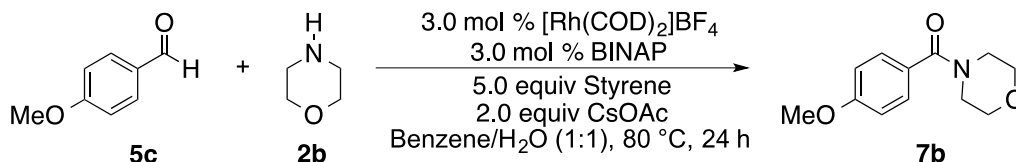

**(4-methoxyphenyl)(morpholino)methanone (Table 3, 7b):**  $[\text{Rh}(\text{COD})_2]\text{BF}_4$  (3.1 mg, 0.0075 mmol, 3.0 mol %), BINAP (4.7 mg, 0.0075 mmol, 3.0 mol %), and CsOAc (96 mg, 0.50 mmol, 2.0 equiv) were added to a 4 mL vial equipped with a stir bar. After purging with nitrogen, to the vial was added sequentially benzene (0.2 mL), morpholine (65  $\mu\text{L}$ , 0.75 mmol, 3.0 equiv), styrene (145  $\mu\text{L}$ , 1.25 mmol, 5.0 equiv), 4-methoxybenzaldehyde (31  $\mu\text{L}$ , 0.25 mmol, 1.0 equiv) and DI water (0.2 mL). The resulting solution was allowed to stir for 24 h at 80 °C. Then, the reaction vial was cooled to room temperature followed by the addition of diphenylmethane as an internal standard for analysis of the crude reaction mixture. The biphasic solution was added EtOAc, dried over anhydrous  $\text{MgSO}_4$ , and filtered. The solution was concentrated *in vacuo* and then purified by silica gel chromatography (1:1 hexanes/EtOAc) to afford a colorless liquid in 99% yield.

$R_f = 0.2$

$^1\text{H NMR}$  (400 MHz,  $\text{CDCl}_3$ )  $\delta$ : 7.51 – 7.33 (m, 2H), 6.98 – 6.82 (m, 2H), 3.83 (s, 3H), 3.75 – 3.50 (m, 8H).

$^{13}\text{C NMR}$  (101 MHz,  $\text{CDCl}_3$ )  $\delta$ : 170.52, 160.99, 129.31, 127.41, 113.88, 67.04, 55.50, 55.46, 29.81.

IR:  $\nu$  2924, 2854, 1629, 1610, 1514.

HRMS (ESI-TOF)  $m/z$ :  $[\text{M}+\text{H}^+]$  calculated for  $\text{C}_{12}\text{H}_{16}\text{NO}_3$ , 222.1130; found, 222.1133.

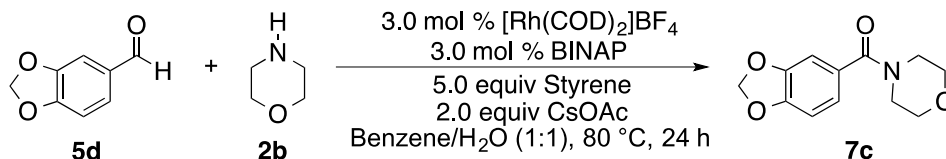

**benzo[d][1,3]dioxol-5-yl(morpholino)methanone (Table 3, 7c):**  $[\text{Rh}(\text{COD})_2]\text{BF}_4$  (3.1 mg, 0.0075 mmol, 3.0 mol %), BINAP (4.7 mg, 0.0075 mmol, 3.0 mol %), and CsOAc (96 mg, 0.50 mmol, 2.0 equiv) were added to a 4 mL vial equipped with a stir bar. After purging with nitrogen, to the vial was added sequentially benzene (0.2 mL), morpholine (65  $\mu\text{L}$ , 0.75 mmol, 3.0 equiv), styrene (145  $\mu\text{L}$ , 1.25 mmol, 5.0 equiv), benzo[d][1,3]dioxole-5-carbaldehyde (38 mg, 0.25 mmol, 1.0 equiv) and DI water (0.2 mL). The resulting solution was allowed to stir for 12 h at 80 °C. After 12 h, the reaction vial was cooled to room temperature followed by the addition of diphenylmethane as an internal standard for analysis of the crude reaction mixture. The biphasic solution was added EtOAc, dried over anhydrous  $\text{MgSO}_4$ , and filtered. The solution was concentrated *in vacuo* and then purified by silica gel chromatography (1:1 hexanes/EtOAc) to afford a viscous liquid in 99% yield.

Wu, Z.; Hull, K. L.

$R_f = 0.25$

$^1\text{H NMR}$  (500 MHz,  $\text{CDCl}_3$ )  $\delta$ : 6.92 (dd,  $J = 7.9, 1.7$  Hz, 1H), 6.90 (d,  $J = 1.5$  Hz, 1H), 6.82 (d,  $J = 7.9$  Hz, 1H), 6.00 (s, 2H), 3.86 – 3.38 (m, 8H).

$^{13}\text{C NMR}$  (101 MHz,  $\text{CDCl}_3$ )  $\delta$ : 170.09, 149.10, 147.80, 128.96, 121.82, 108.40, 108.21, 101.61, 67.02, 48.03, 42.89.

IR:  $\nu$  2973, 2925, 2857, 1633, 1440.

HRMS (ESI-TOF)  $m/z$ :  $[\text{M}+\text{H}^+]$  calculated for  $\text{C}_{12}\text{H}_{14}\text{NO}_4$ , 236.0923; found, 236.0925.

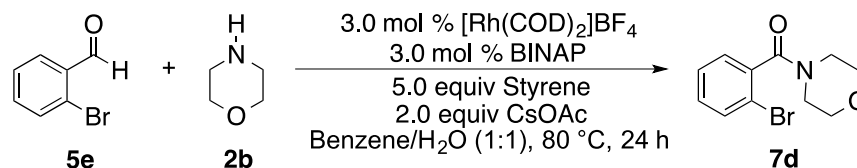

**(2-bromophenyl)(morpholino)methanone (Table 3, 7d)**:  $[\text{Rh}(\text{COD})_2]\text{BF}_4$  (3.1 mg, 0.0075 mmol, 3.0 mol %), BINAP (4.7 mg, 0.0075 mmol, 3.0 mol %), and CsOAc (96 mg, 0.50 mmol, 2.0 equiv) were added to a 4 mL vial equipped with a stir bar. After purging with nitrogen, to the vial was added sequentially benzene (0.2 mL), morpholine (65  $\mu\text{L}$ , 0.75 mmol, 3.0 equiv), styrene (145  $\mu\text{L}$ , 1.25 mmol, 5.0 equiv), 2-bromobenzaldehyde (29  $\mu\text{L}$ , 0.25 mmol, 1.0 equiv) and DI water (0.2 mL). The resulting solution was allowed to stir for 12 h at 80 °C. After 12 h, the reaction vial was cooled to room temperature followed by the addition of diphenylmethane as an internal standard for analysis of the crude reaction mixture. The biphasic solution was added EtOAc, dried over anhydrous  $\text{MgSO}_4$ , and filtered. The solution was concentrated *in vacuo* and then purified by silica gel chromatography (1:1 hexanes/EtOAc) to afford a white solid in 64% yield.

$R_f = 0.2$

mp = 85–88 °C

$^1\text{H NMR}$  (400 MHz,  $\text{CDCl}_3$ )  $\delta$ : 7.58 (dd,  $J = 8.4, 1.1$  Hz, 1H), 7.37 (td,  $J = 7.5, 1.2$  Hz, 1H), 7.31 – 7.22 (m, 2H), 3.92 – 3.83 (m, 1H), 3.83 – 3.69 (m, 4H), 3.59 (ddd,  $J = 11.6, 6.2, 3.3$  Hz, 1H), 3.29 (ddd,  $J = 13.4, 6.2, 3.2$  Hz, 1H), 3.20 (ddd,  $J = 13.4, 6.7, 3.3$  Hz, 1H).

$^{13}\text{C NMR}$  (101 MHz,  $\text{CDCl}_3$ )  $\delta$ : 167.88, 137.68, 132.98, 130.59, 127.95, 127.87, 119.27, 66.90, 66.81, 47.29, 42.14.

IR:  $\nu$  2966, 2927, 2867, 1625, 1427.

HRMS (ESI-TOF)  $m/z$ :  $[\text{M}+\text{H}^+]$  calculated for  $\text{C}_{11}\text{H}_{13}\text{NO}_2\text{Br}$ , 270.0130; found, 270.0135.

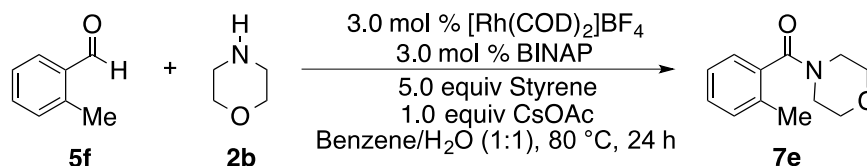

**morpholino(o-tolyl)methanone (Table 3, 7e)**:  $[\text{Rh}(\text{COD})_2]\text{BF}_4$  (3.1 mg, 0.0075 mmol, 3.0 mol %), BINAP (4.7 mg, 0.0075 mmol, 3.0 mol %), and CsOAc (48 mg, 0.25 mmol, 1.0 equiv) were added to a 4 mL vial equipped with a stir bar. After purging with nitrogen, to the vial was added sequentially benzene (0.2 mL), morpholine (65  $\mu\text{L}$ , 0.75 mmol, 3.0 equiv), styrene (145  $\mu\text{L}$ , 1.25 mmol, 5.0 equiv), 2-methylbenzaldehyde (29  $\mu\text{L}$ , 0.25 mmol, 1.0 equiv) and DI water (0.2



mL). The resulting solution was allowed to stir for 24 h at 80 °C. Then, the reaction vial was cooled to room temperature followed by the addition of diphenylmethane as an internal standard for analysis of the crude reaction mixture. The biphasic solution was added EtOAc, dried over anhydrous MgSO<sub>4</sub>, and filtered. The solution was concentrated *in vacuo* and then purified by silica gel chromatography (1:1 hexanes/EtOAc) to afford a colorless liquid in 86% yield.

**R<sub>f</sub>** = 0.15

**<sup>1</sup>H NMR** (400 MHz, CDCl<sub>3</sub>) δ: 7.32 – 7.26 (m, 1H), 7.25 – 7.13 (m, 3H), 3.92 – 3.73 (m, 4H), 3.65 – 3.51 (m, 2H), 3.31 – 3.18 (m, 2H), 2.32 (s, 3H).

**<sup>13</sup>C NMR** (101 MHz, CDCl<sub>3</sub>) δ: 170.20, 135.72, 134.28, 130.61, 129.16, 126.12, 125.92, 67.12, 67.07, 47.37, 42.02, 19.15.

**IR:** ν 2923, 2854, 1635, 1427.

**HRMS** (ESI-TOF) *m/z*: [M+H<sup>+</sup>] calculated for C<sub>12</sub>H<sub>16</sub>NO<sub>2</sub>, 206.1181; found, 206.1183.

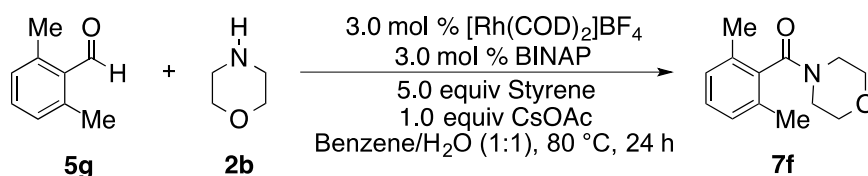

**(2,6-dimethylphenyl)(morpholino)methanone (Table 3, 7f):** [Rh(COD)<sub>2</sub>]BF<sub>4</sub> (3.1 mg, 0.0075 mmol, 3.0 mol %), BINAP (4.7 mg, 0.0075 mmol, 3.0 mol %), and CsOAc (48 mg, 0.25 mmol, 1.0 equiv) were added to a 4 mL vial equipped with a stir bar. After purging with nitrogen, to the vial was added sequentially benzene (0.2 mL), morpholine (65 μL, 0.75 mmol, 3.0 equiv), styrene (145 μL, 1.25 mmol, 5.0 equiv), 2,6-dimethylbenzaldehyde (34 μL, 0.25 mmol, 1.0 equiv) and DI water (0.2 mL). The resulting solution was allowed to stir for 24 h at 80 °C. Then, the reaction vial was cooled to room temperature followed by the addition of diphenylmethane as an internal standard for analysis of the crude reaction mixture. The biphasic solution was added EtOAc, dried over anhydrous MgSO<sub>4</sub>, and filtered. The solution was concentrated *in vacuo* and then purified by silica gel chromatography (1:1 hexanes/EtOAc) to afford a colorless liquid in 88% yield.

**R<sub>f</sub>** = 0.2

**<sup>1</sup>H NMR** (500 MHz, CDCl<sub>3</sub>) δ: 7.15 (t, *J* = 7.6 Hz, 1H), 7.03 (d, *J* = 7.6 Hz, 2H), 3.85 (dd, *J* = 5.8, 3.7 Hz, 2H), 3.77 (dd, *J* = 5.5, 4.1 Hz, 2H), 3.61 – 3.55 (m, 2H), 3.18 (dd, *J* = 5.5, 4.2 Hz, 2H), 2.26 (s, 6H).

**<sup>13</sup>C NMR** (101 MHz, CDCl<sub>3</sub>) δ: 169.82, 135.65, 133.71, 128.67, 127.71, 67.18, 67.06, 46.49, 41.59, 19.23.

**IR:** ν 2972, 2925, 2856, 1633, 1435.

**HRMS** (ESI-TOF) *m/z*: [M+H<sup>+</sup>] calculated for C<sub>13</sub>H<sub>18</sub>NO<sub>2</sub>, 220.1338; found, 220.1339.

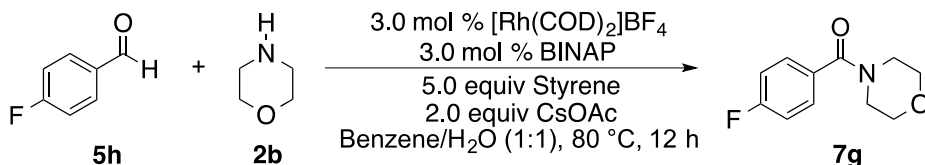

**(4-fluorophenyl)(morpholino)methanone (Table 3, 7g):** [Rh(COD)<sub>2</sub>]BF<sub>4</sub> (3.1 mg, 0.0075 mmol, 3.0 mol %), BINAP (4.7 mg, 0.0075 mmol, 3.0 mol %), and CsOAc (96 mg, 0.50 mmol, 2.0 equiv) were added to a 4 mL vial equipped with a stir

bar. After purging with with nitrogen, to the vial was added sequentially benzene (0.2 mL), morpholine (65  $\mu$ L, 0.75 mmol, 3.0 equiv), styrene (145  $\mu$ L, 1.25 mmol, 5.0 equiv), 4-fluorobenzaldehyde (27  $\mu$ L, 0.25 mmol, 1.0 equiv) and DI water (0.2 mL). The resulting solution was allowed to stir for 12 h at 80  $^{\circ}$ C. After 12 h, the reaction vial was cooled to room temperature followed by the addition of diphenylmethane as an internal standard for analysis of the crude reaction mixture. The biphasic solution was added EtOAc, dried over anhydrous  $\text{MgSO}_4$ , and filtered. The solution was concentrated *in vacuo* and then purified by silica gel chromatography (1:1 hexanes/EtOAc) to afford a colorless liquid in 85% yield.

$R_f = 0.2$

$^1\text{H NMR}$  (400 MHz,  $\text{CDCl}_3$ )  $\delta$ : 7.47 – 7.38 (m, 2H), 7.16 – 7.05 (m, 2H), 4.08 – 3.02 (m, 8H).

$^{13}\text{C NMR}$  (101 MHz,  $\text{CDCl}_3$ )  $\delta$ : 169.63, 163.59 (d,  $J_{\text{CF}} = 250.1$  Hz), 131.39, 129.56 (d,  $J_{\text{CF}} = 8.7$  Hz), 115.79 (d,  $J_{\text{CF}} = 21.8$  Hz), 66.97, 48.05, 42.61.

$^{19}\text{F NMR}$  (470 MHz,  $\text{CDCl}_3$ )  $\delta$ : -110.92 (t,  $J_{\text{CF}} = 6.8$  Hz).

**IR:**  $\nu$  2974, 2928, 2960, 1631, 1619, 1511.

**HRMS** (ESI-TOF)  $m/z$ :  $[\text{M}+\text{H}^+]$  calculated for  $\text{C}_{11}\text{H}_{13}\text{NO}_2\text{F}$ , 210.0930; found, 210.0931.

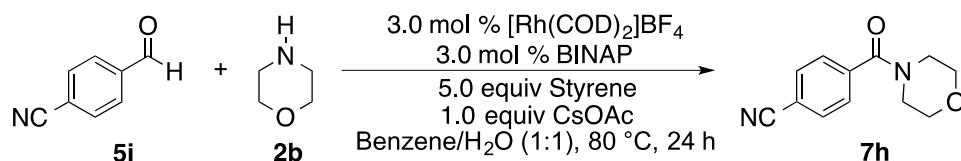

**4-(morpholine-4-carbonyl)benzonitrile (Table 3, 7h):**  $[\text{Rh}(\text{COD})_2]\text{BF}_4$  (3.1 mg, 0.0075 mmol, 3.0 mol %), BINAP (4.7 mg, 0.0075 mmol, 3.0 mol %), and CsOAc (48 mg, 0.25 mmol, 1.0 equiv) were added to a 4 mL vial equipped with a stir bar. After purging with with nitrogen, to the vial was added sequentially benzene (0.2 mL), morpholine (65  $\mu$ L, 0.75 mmol, 3.0 equiv), styrene (145  $\mu$ L, 1.25 mmol, 5.0 equiv), 4-formylbenzonitrile (33 mg, 0.25 mmol, 1.0 equiv) and DI water (0.2 mL). The resulting solution was allowed to stir for 12 h at 80  $^{\circ}$ C. After 12 h, the reaction vial was cooled to room temperature followed by the addition of diphenylmethane as an internal standard for analysis of the crude reaction mixture. The biphasic solution was added EtOAc, dried over anhydrous  $\text{MgSO}_4$ , and filtered. The solution was concentrated *in vacuo* and then purified by silica gel chromatography (1:1 hexanes/EtOAc) to afford a light yellow solid in 48% yield.

$R_f = 0.2$

**mp** = 138-140  $^{\circ}$ C (reported mp = 139-140  $^{\circ}$ C)<sup>16</sup>

$^1\text{H NMR}$  (400 MHz,  $\text{CDCl}_3$ )  $\delta$ : 7.79 – 7.68 (m, 2H), 7.57 – 7.47 (m, 2H), 3.88 – 3.55 (m, 6H), 3.46 – 3.32 (m, 2H).

$^{13}\text{C NMR}$  (101 MHz,  $\text{CDCl}_3$ )  $\delta$ : 168.45, 139.77, 132.66, 127.96, 118.13, 113.90, 66.89, 48.12, 42.67.

**IR:**  $\nu$  2927, 2863, 2227, 1621, 1441.

**HRMS** (ESI-TOF)  $m/z$ :  $[\text{M}+\text{H}^+]$  calculated for  $\text{C}_{12}\text{H}_{13}\text{N}_2\text{O}_2$ , 217.0977; found, 217.0983.

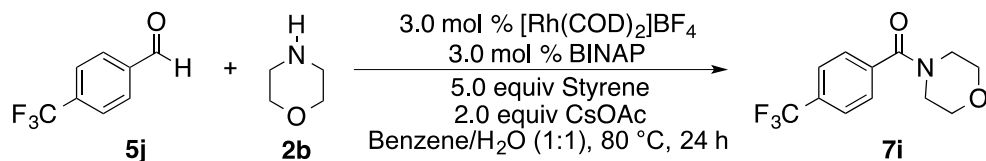

**morpholino(4-(trifluoromethyl)phenyl)methanone (Table 3, 7i):**  $[\text{Rh}(\text{COD})_2]\text{BF}_4$  (3.1 mg, 0.0075 mmol, 3.0 mol %), BINAP (4.7 mg, 0.0075 mmol, 3.0 mol %), and CsOAc (96 mg, 0.50 mmol, 2.0 equiv) were added to a 4 mL vial equipped with a stir bar. After purging with nitrogen, to the vial was added sequentially benzene (0.2 mL), morpholine (65  $\mu\text{L}$ , 0.75 mmol, 3.0 equiv), styrene (145  $\mu\text{L}$ , 1.25 mmol, 5.0 equiv), 4-(trifluoromethyl)benzaldehyde (34  $\mu\text{L}$ , 0.25 mmol, 1.0 equiv) and DI water (0.2 mL). The resulting solution was allowed to stir for 12 h at 80  $^\circ\text{C}$ . After 12 h, the reaction vial was cooled to room temperature followed by the addition of diphenylmethane as an internal standard for analysis of the crude reaction mixture. The biphasic solution was added EtOAc, dried over anhydrous  $\text{MgSO}_4$ , and filtered. The solution was concentrated *in vacuo* and then purified by silica gel chromatography (1:1 hexanes/EtOAc) to afford a colorless liquid in 72% yield.

$R_f = 0.2$

$^1\text{H NMR}$  (400 MHz,  $\text{CDCl}_3$ )  $\delta$ : 7.69 (d,  $J = 8.0$  Hz, 2H), 7.52 (d,  $J = 8.0$  Hz, 2H), 3.88 – 3.57 (m, 6H), 3.53 – 3.26 (m, 2H).

$^{13}\text{C NMR}$  (101 MHz,  $\text{CDCl}_3$ )  $\delta$ : 169.14, 139.07, 132.07 (q,  $J_{\text{CF}} = 32.8$  Hz), 127.69, 125.92 (q,  $J_{\text{CF}} = 3.8$  Hz), 123.86 (q,  $J_{\text{CF}} = 272.5$  Hz), 67.02, 48.31, 42.76.

$^{19}\text{F NMR}$  (470 MHz,  $\text{CDCl}_3$ )  $\delta$ : 62.98 (s).

IR:  $\nu$  2974, 2924, 2864, 1637, 1434.

HRMS (ESI-TOF)  $m/z$ :  $[\text{M}+\text{H}^+]$  calculated for  $\text{C}_{12}\text{H}_{13}\text{NO}_2\text{F}_3$ , 260.0898; found, 260.0905.

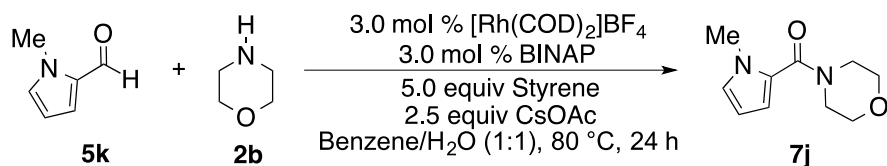

**(1-methyl-1H-pyrrol-2-yl)(morpholino)methanone (Table 3, 7j):**  $[\text{Rh}(\text{COD})_2]\text{BF}_4$  (3.1 mg, 0.0075 mmol, 3.0 mol %), BINAP (4.7 mg, 0.0075 mmol, 3.0 mol %), and CsOAc (120 mg, 1.25 mmol, 2.5 equiv) were added to a 4 mL vial equipped with a stir bar. After purging with nitrogen, to the vial was added sequentially benzene (0.2 mL), morpholine (65  $\mu\text{L}$ , 0.75 mmol, 3.0 equiv), styrene (145  $\mu\text{L}$ , 1.25 mmol, 5.0 equiv), 1-methyl-1H-pyrrole-2-carbaldehyde (27  $\mu\text{L}$ , 0.25 mmol, 1.0 equiv) and DI water (0.2 mL). The resulting solution was allowed to stir for 12 h at 80  $^\circ\text{C}$ . After 12 h, the reaction vial was cooled to room temperature followed by the addition of diphenylmethane as an internal standard for analysis of the crude reaction mixture. The biphasic solution was added EtOAc, dried over anhydrous  $\text{MgSO}_4$ , and filtered. The solution was concentrated *in vacuo* and then purified by silica gel chromatography (1:1 hexanes/EtOAc) to afford a light yellow solid in 97% yield.

$R_f = 0.3$

mp = 80–83  $^\circ\text{C}$

**<sup>1</sup>H NMR** (400 MHz, C<sub>6</sub>D<sub>6</sub>) δ: 6.28 (t, J = 2.1 Hz, 1H), 6.21 (dd, J = 3.9, 1.7 Hz, 1H), 6.10 (dd, J = 3.8, 2.6 Hz, 1H), 3.47 (s, 3H), 3.43 (dd, J = 5.6, 4.0 Hz, 4H), 3.27 – 3.19 (m, 4H).

**<sup>13</sup>C NMR** (101 MHz, CDCl<sub>3</sub>) δ: 163.21, 126.75, 124.77, 113.25, 107.13, 67.25, 45.87, 35.94.

**IR:** ν 2968, 2930, 2863, 1602, 1534.

**HRMS** (ESI-TOF) *m/z*: [M+H<sup>+</sup>] calculated for C<sub>12</sub>H<sub>13</sub>N<sub>2</sub>O<sub>2</sub>, 195.1134; found, 195.1131.

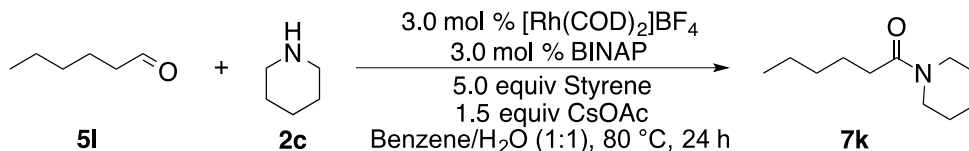

**1-(piperidin-1-yl)hexan-1-one (Table 3, 7k):** [Rh(COD)<sub>2</sub>]<sub>2</sub>BF<sub>4</sub> (3.1 mg, 0.0075 mmol, 3.0 mol %), BINAP (4.7 mg, 0.0075 mmol, 3.0 mol %), and CsOAc (72 mg, 0.38 mmol, 1.5 equiv) were added to a 4 mL vial equipped with a stir bar. After purging with nitrogen, to the vial was added sequentially benzene (0.2 mL), piperidine (74 μL, 0.75 mmol, 3.0 equiv), styrene (145 μL, 1.25 mmol, 5.0 equiv), hexanal (34 μL, 0.25 mmol, 1.0 equiv) and DI water (0.2 mL). The resulting solution was allowed to stir for 24 h at 80 °C. Then, the reaction vial was cooled to room temperature followed by the addition of diphenylmethane as an internal standard for analysis of the crude reaction mixture. The biphasic solution was added EtOAc, dried over anhydrous MgSO<sub>4</sub>, and filtered. The solution was concentrated *in vacuo* and then purified by silica gel chromatography (3:1 hexanes/EtOAc) to afford a light yellow liquid in 63% yield.

**R<sub>f</sub>** = 0.2

**<sup>1</sup>H NMR** (400 MHz, CDCl<sub>3</sub>) δ: 6.54 – 6.39 (m, 4H), 2.30 (td, J = 7.8, 1.5 Hz, 2H), 1.66 – 1.57 (m, 4H), 1.57 – 1.48 (m, 4H), 1.39 – 1.26 (m, 4H), 0.88 (t, J = 6.8 Hz, 3H).

**<sup>13</sup>C NMR** (126 MHz, CDCl<sub>3</sub>) δ: 171.66, 46.84, 42.70, 33.58, 31.84, 26.70, 25.72, 25.32, 24.72, 22.62, 14.10.

**IR:** ν 2934, 2857, 2960, 1641, 1435.

**HRMS** (ESI-TOF) *m/z*: [M+H<sup>+</sup>] calculated for C<sub>11</sub>H<sub>22</sub>NO, 184.1701; found, 184.1705.

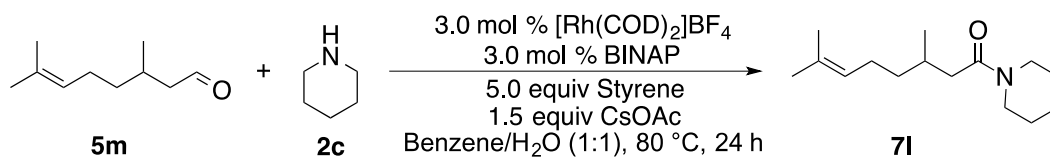

**3,7-dimethyl-1-(piperidin-1-yl)oct-6-en-1-one (Table 3, 7l):** [Rh(COD)<sub>2</sub>]<sub>2</sub>BF<sub>4</sub> (3.1 mg, 0.0075 mmol, 3.0 mol %), BINAP (4.7 mg, 0.0075 mmol, 3.0 mol %), and CsOAc (72 mg, 0.38 mmol, 1.5 equiv) were added to a 4 mL vial equipped with a stir bar. After purging with nitrogen, to the vial was added sequentially benzene (0.2 mL), piperidine (74 μL, 0.75 mmol, 3.0 equiv), styrene (145 μL, 1.25 mmol, 5.0 equiv), 3,7-dimethyloct-6-enal (45 μL, 0.25 mmol, 1.0 equiv) and DI water (0.2 mL). The resulting solution was allowed to stir for 24 h at 80 °C. Then, the reaction vial was cooled to room temperature followed by the addition of diphenylmethane as an internal standard for analysis of the crude reaction mixture. The biphasic solution was added EtOAc, dried over anhydrous MgSO<sub>4</sub>, and filtered. The solution was concentrated *in vacuo* and then purified by silica gel chromatography (4:1 hexanes/EtOAc) to afford a colorless liquid in 78% yield.

**R<sub>f</sub>** = 0.35

**<sup>1</sup>H NMR** (400 MHz, CDCl<sub>3</sub>) δ: 5.23 – 4.88 (m, 1H), 3.55 (br, 2H), 3.39 (br, 2H), 2.32 (dd, J = 14.3, 5.9 Hz, 1H), 2.12 (dd, J = 14.3, 8.4 Hz, 1H), 2.08 – 1.90 (m, 3H), 1.67 (t, J = 1.3 Hz, 3H), 1.65 – 1.61 (m, 1H), 1.60 (d, J = 1.3 Hz, 3H), 1.57 – 1.48 (m, 4H), 1.38 (dddd, J = 13.4, 9.3, 6.5, 5.4 Hz, 1H), 1.21 (dddd, J = 13.6, 9.3, 7.9, 5.8 Hz, 1H), 0.94 (d, J = 6.5 Hz, 3H).

**<sup>13</sup>C NMR** (101 MHz, CDCl<sub>3</sub>) δ: 171.07, 131.51, 124.65, 47.09, 42.79, 40.85, 37.27, 30.26, 29.83, 26.76, 25.83, 25.66, 24.75, 19.95, 17.82.

**IR:** ν 2929, 2856, 1642, 1443.

**HRMS** (ESI-TOF) *m/z*: [M+H<sup>+</sup>] calculated for C<sub>15</sub>H<sub>28</sub>NO, 238.2171; found, 238.2179.

## H. Reference:

- (1) Chiang, P.-C.; Kim, Y.; Bode, J. W. *Chem. Commun.* **2009**, 45, 4566-4568.
- (2) Allen, C. L.; Chhatwal, R.; Williams, J. M. J. *Chem. Commun.* **2012**, 48, 666-668.
- (3) Funasaka, S.; Mukaiyama, T. *Bull. Chem. Soc. Jpn.* **2008**, 81, 148-159.
- (4) Ohshima, T.; Iwasaki, T.; Maegawa, Y.; Yoshiyama, A.; Mashima, K. *J. Am. Chem. Soc.* **2008**, 130, 2944-2945.
- (5) Liu, H.; Laurenczy, G.; Yan, N.; Dyson, P. J. *Chem. Commun.* **2014**, 50, 341-343.
- (6) Badr, M. Z. A.; Aly, M. M.; Abdel-Latif, F. F. *J. Org. Chem.* **1979**, 44, 3244-3247.
- (7) Hanada, S.; Tsutsumi, E.; Motoyama, Y.; Nagashima, H. *J. Am. Chem. Soc.* **2009**, 131, 15032-15040.
- (8) Tamura, M.; Murase, D.; Komura, K. *Synthesis*, **2015**, 47, 769-776.
- (9) Szostak, M.; Spain, M.; Eberhart, A. J.; Procter, D. J. *J. Am. Chem. Soc.* **2014**, 136, 2268-2271.
- (10) Watson, A. J. A.; Wakeham, R. J.; Maxwell, A. C. Williams, J. M. J. *Tetrahedron*, **2014**, 70, 3683-3690.
- (11) Morlino, V. J.; Martin, R. B. *J. Am. Chem. Soc.* **1967**, 89, 3107-3111.
- (12) Shiina, I.; Suenaga, Y.; Nakano, M.; Mukaiyama, T. *Bull. Chem. Soc. Jpn.* **2000**, 73, 2811-2818.
- (13) Davies, S. G.; Dixon, D. J. *J. Chem. Soc., Perkin Trans.* **2002**, 1, 1869-1876.
- (14) Saito, Y.; Ouchi, H.; Takahata, H. *Tetrahedron*, **2008**, 64, 11129-11135.
- (15) Brodney, M. A.; Padwa, A. *J. Org. Chem.* **1999**, 64, 556-565.
- (16) Tamaru, Y.; Yamada, Y.; Yoshida, Z.-i. *Synthesis*, **1983**, 474-476.
- (17) Sidhu, G. S.; Sattur, P. B.; Sadanandam, Y. S. *Arch. Pharmaz.* **1972**, 54-57.
- (18) Davies, S. G.; Dixon, D. J. *J. Chem. Soc., Perkin, Trans. I*, **2002**, 1869-1876.
